# Supplementary material for: Heparin-Binding Protein: A Novel Biomarker Linking Four Different Cardiovascular Diseases
Source: Hindawi journal article supplement (doi:10.1155/2020/9575373), 2020-06-15
Supplement: f1 [file 9575373.f1.pdf]

## Supplementary Table 1:

### Lists of genes of HBPs, myocardial Ischemia, myocardial infarction, myocarditis and atherosclerosis

| HBP       | Myocardial Ischemia | Myocardial infarction | Myocarditis | Atherosclerosis |
|-----------|---------------------|-----------------------|-------------|-----------------|
| 1-Oct     | HMGCR               | PLG                   | ABCD1       | PCSK9           |
| A-152E5.1 | SCN5A               | P2RY12                | ACAT2       | ABCA1           |
| A-152E5.2 | CACNA1D             | F2                    | ACE         | PTGS2           |
| A1BG      | CACNA1C             | NR3C2                 | ACE2        | NDUFB9          |
| A2M       | SLC6A4              | DPP4                  | ACHE        | VDR             |
| A2MRAP    | CACNA1F             | ADRB2                 | ACLY        | PPARA           |
| A4        | CACNA1S             | ACE                   | ACP5        | PTGS1           |
| AACT      | SCN4A               | TNF                   | ADAM17      | NDUFV2          |
| AAG4      | PTGS2               | HMGCR                 | ADAM9       | ACE             |
| AAMP      | PTGS1               | PPARG                 | ADAMTS1     | HMGCR           |
| AAT       | PPARA               | PPARA                 | ADAR        | P2RY12          |
| ABCB1     | GUCY1B2             | PTGS2                 | ADRB1       | ABCG5           |
| ABCB11    | GUCY1B1             | AGTR1                 | ADRB2       | F2R             |
| ABCB4     | ACE                 | ITGA2B                | AFP         | NPC1L1          |
| ABCC6     | ADRB1               | ITGB3                 | AGTR1       | NR3C1           |
| ABCG2     | ESR1                | PPARD                 | AHR         | NR3C2           |
| ABCG5     | ESR2                | ADRB1                 | AIM2        | ABCG8           |
| ABCP      | PDE5A               | SERPINC1              | AKT1        | CNR1            |
| ABP1      | ITGA2B              | GLP1R                 | AKTIP       | PTGIR           |
| AD1       | ITGB3               | F2R                   | ALB         | ADRB2           |
| AD3       | PDE7A               | PTGS1                 | ALOX5       | VKORC1          |
| ADAMTS1   | PDE2A               | INSR                  | ALPK1       | PDE3A           |
| ADAMTS11  | PDE6G               | LRP8                  | ANG         | NDUFC2          |
| ADAMTS3   | PDE4B               | CSF3R                 | ANGPT1      | MT-ND2          |
| ADAMTS5   | PDE3A               | ADRA1D                | ANPEP       | GRIN2A          |
| ADAMTS8   | PDE7B               | TRPV1                 | ANXA5       | XDH             |
| ADAMTS9   | VKORC1              | ADRB3                 | ANXA6       | ADRB1           |
| ADCP2     | PDE9A               | FKBP1A                | APEX1       | MT-ND5          |
| ADMLX     | PDE6D               | SLC12A3               | APLN        | GPD2            |
| ADMP2     | PDE1C               | GUCY1B1               | APLNR       | MT-ND1          |
| ADMR      | PDE3B               | OPRM1                 | APOE        | MT-ND6          |
| ADRA1B    | THRB                | CACNA1D               | AQP4        | ADORA3          |
| AE1       | PDE6H               | CACNA1C               | AR          | GRIN2B          |
| AGRP      | PDE6B               | GABRB3                | ARSA        | NDUFA7          |
| AGRT      | PDE6A               | GABRQ                 | ASGR1       | NDUFS3          |
| AGT       | THRA                | TUBB8                 | ATF4        | MT-ND4L         |
| AGTI      | PDE1B               | TUBB3                 | ATP2A2      | MT-ND4          |
| AGTIL     | PDE1A               | TUBB                  | AVP         | MT-ND3          |
| AIGF      | PDE4D               | TUBB4B                | B2M         | GRIN3A          |
| AIMP1     | PDE8B               | GABRD                 | BAG3        | NDUFA4          |
| AKR1B1    | SLC29A1             | KCNK18                | BCHE        | NDUFA13         |

|         |           |         |         |          |
|---------|-----------|---------|---------|----------|
| ALDR1   | PDE10A    | GABRA5  | BCKDK   | NDUFA4L2 |
| AMBP    | PDE4C     | GABRG3  | BCL2L12 | NDUFA6   |
| ANG     | PDE6C     | TUBB6   | BCL6    | NDUFA12  |
| ANX1    | PDE8A     | PDE3A   | BMP2    | NDUFB1   |
| ANX2    | PDE4A     | KCNK3   | BMPR2   | NDUFAF3  |
| ANX2L4  | FGF21     | ADRA1B  | BTG3    | GRIN1    |
| ANX3    | TFPI      | KCNK9   | C3      | NDUFA11  |
| ANX5    | GSK3B     | HTR3A   | C5      | PAH      |
| ANX6    | MPO       | HTR4    | C5orf38 | NDUFA3   |
| ANXA1   | AREG      | GABRB1  | CA4     | ADORA2B  |
| ANXA2   | CIRBP     | GABRG1  | CABIN1  | NDUFS5   |
| ANXA3   | TNFRSF11B | PTGER1  | CADM1   | NDUFV1   |
| ANXA5   | ALDH2     | GABRA2  | CALCR   | NDUFB8   |
| ANXA6   | SAA1      | DRD2    | CALU    | NDUFB6   |
| AOC1    | CSF3      | GLRA1   | CASP1   | NDUFS4   |
| APCS    | PIK3CG    | GABRB2  | CASP3   | NDUFAF2  |
| APLP1   | EPAS1     | GABRA6  | CASP8   | ADORA1   |
| APLP2   | HIF1A     | TUBB2B  | CASP9   | GRIN2C   |
| APOA5   | TLR2      | TUBB2A  | CAST    | NDUFV3   |
| APOB    | TLR4      | PTGER2  | CAT     | NDUFS2   |
| APOE    | HMGB1     | GUCY1B2 | CAV1    | NDUFB11  |
| APOH    | FADD      | ADRA1A  | CCL11   | NDUFS6   |
| APOJ    | FABP3     | FAAH    | CCL2    | NDUFB10  |
| APP     | PTEN      | GABRG2  | CCL20   | NDUFA9   |
| APPL2   | UNC5B     | GABRA4  | CCL26   | NDUFAF1  |
| APRIL   | HMOX1     | TUBB4A  | CCL27   | NDUFB5   |
| AQP1    | FGF2      | GABRE   | CCL3    | NDUFA2   |
| ARA     | HGF       | CACNA1F | CCL4    | NDUFA10  |
| ARG1    | SELP      | TUBB1   | CCL5    | NDUFA5   |
| ART     | GJA1      | KCNK10  | CCL7    | ADORA2A  |
| ARTN    | VEGFA     | GABRP   | CCN1    | F10      |
| ASIP    | NOS3      | KCNK2   | CCN2    | NDUFA1   |
| ASP     | TNF       | CACNA1S | CCR1    | NDUFAF4  |
| AT3     | DPP4      | GABRA1  | CCR2    | NDUFA8   |
| ATA3    | LEP       | NPC1L1  | CCR3    | NDUFB3   |
| ATP1A1  | MB        | GABRA3  | CCR4    | GRIN3B   |
| ATP1B   | CRP       | PPIA    | CCR5    | NDUFS7   |
| ATP1B1  | IL10      | F10     | CCR7    | NDUFS8   |
| ATP1B3  | PPARG     | EPOR    | CCR8    | NDUFC1   |
| ATP2B1  | AGTR2     | ADORA2B | CD14    | GRIN2D   |
| ATP5A   | FGFR1     | ADORA3  | CD163   | NDUFB7   |
| ATP5A1  | MMP1      | ADORA1  | CD19    | NDUFB2   |
| ATP5AL2 | CXCL12    | ADORA2A | CD2     | NDUFB4   |
| ATP7B   | TNNI3     | VKORC1  | CD209   | NDUFS1   |
| ATPM    | RYR2      | CELSR2  | CD27    | NDUFAB1  |
| ATRC2   | HRH3      | PHACTR1 | CD274   | TUBB4B   |
| ATRN    | CXCR4     | IL1R1   | CD276   | TUBB8    |

|           |         |           |         |         |
|-----------|---------|-----------|---------|---------|
| AZU1      | PLA2G1B | GUCY1A1   | CD28    | TUBB3   |
| B2G1      | UCN3    | REN       | CD34    | TUBB    |
| B2M       | EDN1    | CDKN2B    | CD38    | TUBB6   |
| BACE      | APLN    | TNNI3     | CD3D    | TUBB2B  |
| BACE1     | CASP3   | TNNT2     | CD4     | TUBB2A  |
| BAL       | CCL2    | ESR1      | CD40    | TUBB4A  |
| BCA1      | INS     | ESR2      | CD40LG  | TUBB1   |
| BCRP      | OLR1    | MME       | CD44    | PLA2G7  |
| BCRP1     | PCSK5   | C5        | CD55    | IL1B    |
| BDK       | ST3GAL4 | VDR       | CD68    | PDE5A   |
| BEK       | EPHB2   | THRA      | CD69    | PPARG   |
| BF        | NLRP3   | PDE3B     | CD70    | AGTR1   |
| BFD       | STAT3   | THRB      | CD72    | KCNJ11  |
| BGN       | TXN     | SLC5A2    | CD80    | ABCC8   |
| BLC       | TGFB1   | TNNC1     | CD83    | EDNRA   |
| BMP2      | SLC33A1 | SLC12A1   | CD86    | PIK3CG  |
| BMP2A     | TNNT2   | LPA       | CDK9    | IPO5    |
| BMP2B     | REN     | MEF2A     | CDKN2A  | ZHX2    |
| BMP3      | SOAT1   | BRAP      | CEACAM5 | LDLR    |
| BMP3A     | PLAT    | MIA3      | CEBPA   | PINX1   |
| BMP4      | TET1    | KCNE2     | CEBPB   | PINX1   |
| BMP6      | MMP9    | LIPA      | CENPA   | HDAC9   |
| BMP7      | CXCL8   | CCT7      | CFD     | SLC17A4 |
| BP2       | BECN1   | CLCN1     | CFLAR   | APOE    |
| BRI       | PARP1   | RNF13     | CFP     | ESR1    |
| BRI2      | JAK2    | SMARCA4   | CGAS    | FGF21   |
| BSEP      | SIRT3   | ATXN2     | CHST15  | ATXN2   |
| BTC       | TAB1    | PSRC1     | CHUK    | MAPK10  |
| BWR1A     | TMSB4X  | PDZD2     | CIITA   | DKK3    |
| BWSCR1A   | SELE    | IRX1      | CISH    | CSMD3   |
| C10orf13  | TRPV1   | C10orf142 | CLU     | MAPK14  |
| C10orf58  | ICAM1   | MAT2A     | CMA1    | CX3CL1  |
| C1IN      | BSG     | PLPP3     | CNOT7   | SCARB1  |
| C1NH      | ZGLP1   | PLCL2     | CNP     | REN     |
| C1QA      | SOD1    | AP3D1     | CNR1    | NLRP3   |
| C1QB      | VPS51   | MORF4L1   | CNR2    | CD40    |
| C1QC      | ALB     | JCAD      | CORT    | ANGPTL4 |
| C1QG      | MTOR    | ATP2B1    | CP      | MAPK11  |
| C2        | IL6     | WDR12     | CPE     | CCR2    |
| C20orf182 | NPPA    | IL6R      | CR1     | ALOX5   |
| C3        | GRK2    | YTHDF3    | CR2     | LRIG1   |
| C4A       | NOS2    | PCSK9     | CRP     | SIRT1   |
| C4BP      | HTRA2   | ZC3HC1    | CSDE1   | ACE2    |
| C4BPA     | S100A6  | SMAD3     | CSF1    | OSBPL10 |
| C4orf31   | IL18    | COL4A2    | CSF1R   | ANGPTL8 |
| C5        | EPO     | APOC1     | CSF2    | LPA     |
| C6        | IFNG    | FES       | CSF3    | IL32    |

|           |          |           |          |           |
|-----------|----------|-----------|----------|-----------|
| C6orf15   | MMP2     | SERPINA5  | CSRP3    | PGR       |
| C6orf25   | ITGB2    | TENM3     | CTF1     | ADAMTS4   |
| C7        | FGF1     | DDI1      | CTH      | TLR4      |
| C8A       | CYCS     | SPECC1L   | CTLA4    | CSF2RA    |
| C8B       | NOD2     | ZNF536    | CTSB     | SORBS3    |
| C8G       | TFF3     | QKI       | CTSK     | IL37      |
| C9        | SELL     | EIF4A3    | CX3CL1   | CSF3      |
| CACH1     | CD34     | CEACAM6   | CX3CR1   | LRRTM4    |
| CACN1     | AQP1     | SAYSD1    | CXADR    | APOA1     |
| CACNA1S   | FXYD1    | DHFR      | CXCL1    | CCN3      |
| CACNL1A3  | CAST     | DGKB      | CXCL10   | CNR2      |
| CAL1H     | SERPINE1 | COL4A1    | CXCL12   | ALG1      |
| CAT2      | P2RX3    | SMG6      | CXCL13   | MAP4K4    |
| CBG       | DSE      | VEGFA     | CXCL8    | TREM1     |
| CCC6      | ATF6     | NPR1      | CXCL9    | CCDC57    |
| CCDC134   | ADAMTS13 | DCLK2     | CXCR3    | CDKN1A    |
| CCDC80    | TNC      | PRKCD     | CXCR5    | IGLL1     |
| CCL1      | CX3CL1   | EDNRA     | CYBB     | IL6       |
| CCL11     | SLC2A1   | HHIPL1    | CYCS     | TNFRSF9   |
| CCL13     | MAPK3    | BCAS3     | CYP11B2  | INS       |
| CCL15     | TAGLN    | CXCR4     | DDIT3    | CD4       |
| CCL17     | EDNRB    | MMP1      | DDX53    | MAP6      |
| CCL19     | VDAC1    | SELP      | DES      | RARRES2   |
| CCL2      | NOC2L    | MMP8      | DHX58    | OLR1      |
| CCL21     | AVPR2    | MMP7      | DLD      | OSMR      |
| CCL22     | TLX2     | NR3C1     | DMD      | MACF1     |
| CCL23     | P2RX7    | OXTR      | DNTT     | RBP4      |
| CCL24     | ITLN1    | SLC6A4    | DSP      | PDCD4     |
| CCL25     | F2R      | TRIB1     | DYSF     | CCL2      |
| CCL27     | PER2     | MMP13     | EBI3     | STAT3     |
| CCL28     | SMC2     | ADAMTS7   | EDN1     | HAMP      |
| CCL3      | FCER1G   | TRPA1     | EDNRA    | TRPA1     |
| CCL4      | COMT     | TTC32     | EIF2AK2  | SERP2     |
| CCL5      | CD180    | GP6       | EIF4E    | WWOX      |
| CCL7      | SIRT1    | GIP       | EIF4EBP1 | CORT      |
| CCL8      | VWF      | CCN2      | EMB      | PPARGC1A  |
| CCN1      | NGF      | ACADS     | EMP1     | ELN       |
| CCN2      | ANXA5    | FOXL1     | EPAS1    | TSLP      |
| CD11B     | S100A12  | ZEB2      | EPHA3    | TLR7      |
| CD1D      | UCN      | CSF3      | EPHB2    | TNFRSF13C |
| CD26      | ASIC2    | IL1F10    | EPO      | ANPEP     |
| CD36      | CASP1    | MMP12     | ESR1     | IFNG      |
| CD45      | SSB      | PAPPA2    | ESR2     | IKBKB     |
| CD47      | F3       | SEC24D    | F2       | TNFSF13B  |
| CDA08     | CMA1     | APLN      | F2R      | PAQR8     |
| CDABP0092 | CAT      | TNFRSF11B | F2RL1    | NES       |
| CDH8      | PHLPP1   | SERPINE1  | F3       | KLF4      |

|          |          |          |          |           |
|----------|----------|----------|----------|-----------|
| CEL      | IGF1     | LTA      | F8       | TFEB      |
| CFB      | CNP      | ALDH2    | FASLG    | VWF       |
| CFD      | APLNR    | KITLG    | FGF2     | BSG       |
| CFH      | FGF4     | LGALS3   | FGF23    | BMP8A     |
| CFI      | ADRB2    | MSC      | FGL2     | C10orf113 |
| CFP      | GLP1R    | UCP3     | FIP1L1   | ABCA7     |
| CGI-55   | ALOX5    | FN1      | FLNA     | CD14      |
| CHIP28   | CHI3L1   | APOA1    | FLT3LG   | GPBR1     |
| CHRD     | XPR1     | TIMP1    | FN1      | FEZ1      |
| CIP1     | FN1      | CYP2C19  | FOS      | SELE      |
| CLG4A    | DNM1L    | MPI      | FOXP3    | CD47      |
| CLG4B    | IL1A     | TGFB1    | FUT4     | NSMCE1    |
| CLI      | ANGPT1   | LCN2     | FUT7     | NOS3      |
| CLU      | MAP3K5   | TXN      | FYN      | LYST      |
| CMA1     | GOT2     | NGF      | G6PD     | SAA1      |
| CO4      | CXCR2    | CD14     | GAPDH    | NAMPT     |
| COL11A1  | PRH1     | GH1      | GBP1     | ZYG11B    |
| COL11A2  | SETD2    | FABP3    | GDNF     | TNF       |
| COL12A1  | CNR2     | HIF1A    | GH1      | EGFR      |
| COL12A1L | FABP4    | CETP     | GJA1     | TLR10     |
| COL13A1  | VEGFC    | DES      | GJC1     | NEGR1     |
| COL14A1  | VEGFB    | RARRES2  | GLB1     | LCN2      |
| COL18A1  | SLC9A1   | PIK3CG   | GOLGA2   | PLEKHO1   |
| COL19A1  | PGAM5    | GCH1     | GP5      | PTEN      |
| COL1A1   | ASIC3    | IL6      | GPI      | ZC3H12A   |
| COL1A2   | IL17A    | PPARGC1A | GPX1     | MTHFD1L   |
| COL23A1  | HDAC4    | AHSG     | GSK3B    | CNOT4     |
| COL25A1  | MBL2     | S100A1   | GZMB     | TGFB1     |
| COL2A1   | TXNIP    | CCR7     | HAMP     | CXCR4     |
| COL3A1   | APOE     | PIK3CD   | HBEGF    | MC1R      |
| COL4A1   | TTN      | ATM      | HDAC11   | CNNM1     |
| COL4A2   | MSC      | APOE     | HDAC2    | PIAS3     |
| COL5A1   | SERPINA4 | MMP9     | HECA     | EVPL      |
| COL5A3   | SERPINA5 | VCAM1    | HGF      | UTRN      |
| COL6A3   | CTSL     | PIIF     | HIF1A    | EFHC1     |
| COL9A1   | TYMP     | HDAC4    | HIST1H4L | MSC       |
| COLEC1   | IL1B     | INS      | HLA-DQB1 | LINC00305 |
| COLL6    | OSM      | VPS51    | HMGB1    | HMOX1     |
| COLQ     | CSF2     | MYOCD    | HMGCR    | PDZD8     |
| COMP     | KLK1     | ADAMTS13 | HMGXB3   | PLA2G1B   |
| COMT     | NF2      | FGF23    | HMOX1    | SELPLG    |
| CP       | PLD1     | PAPPA    | HNF1A    | TLR2      |
| CPAMD1   | FASLG    | ENG      | HPRT1    | PLTP      |
| CPAMD2   | UCP2     | HGF      | HRH1     | PTH       |
| CPAMD4   | LOX      | ST13     | HSF1     | TRAF6     |
| CPAMD5   | S100A1   | IL33     | HSP90B1  | NAV2      |
| CPB2     | CCN2     | GDF15    | HSPA5    | PNKD      |

|          |           |           |         |           |
|----------|-----------|-----------|---------|-----------|
| CPD      | VASP      | PLA2G1B   | HTR3A   | HMGB1     |
| CPSB     | CASC1     | PTEN      | HTT     | RBFOX1    |
| CR3A     | SERPINA1  | GHRH      | HUNK    | NR1I2     |
| CRACM1   | LPL       | TNFSF11   | ICAM1   | SIRT6     |
| CRISP11  | RIPK1     | NOS3      | ICOS    | VIT       |
| CRISPLD2 | NOS1      | CCL2      | ICOSLG  | GABRG2    |
| CSF2     | SERPING1  | CST3      | IDO1    | RGL1      |
| CTAP3    | CAV1      | DRAM2     | IDS     | MPO       |
| CTGF     | AKR1B1    | LIPG      | IFIH1   | TANK      |
| CTSB     | PPARGC1A  | CD34      | IFNA1   | DUSP1     |
| CTSG     | RACK1     | GJA1      | IFNA2   | TGFB2     |
| CX32     | AQP4      | TLR4      | IFNA6   | SELP      |
| CX3CL1   | MIF       | GPI       | IFNB1   | RETN      |
| CXCL1    | KITLG     | CRP       | IFNG    | RILPL2    |
| CXCL10   | EIF5A     | ATF3      | IFNL2   | CD36      |
| CXCL11   | SMAD3     | IDO1      | IL10    | DST       |
| CXCL12   | TRPA1     | CYP2J2    | IL12RB1 | IL13      |
| CXCL12   | PF4       | ISL1      | IL13    | TRAM2     |
| CXCL13   | CAV3      | LEP       | IL15    | BRCA1     |
| CXCL16   | TLR9      | HMGB1     | IL17A   | CETP      |
| CXCL2    | CTSD      | IGFBP4    | IL17D   | NTM       |
| CXCL4    | HPGDS     | SESN2     | IL17RA  | ACSM3     |
| CXCL4V1  | IL33      | MBL2      | IL18    | ASAH2     |
| CXCL6    | NPY       | MB        | IL18BP  | CHI3L1    |
| CXCL7    | RIPK3     | RXRA      | IL1A    | PPP4R2    |
| CXCL8    | AGTR1     | ENHO      | IL1B    | DNMT1     |
| CYC      | PI3       | FGF2      | IL1R1   | PKN2      |
| CYCS     | IRF9      | SOD3      | IL1RN   | CLU       |
| CYH      | ABCC8     | SMAD9     | IL2     | TNIK      |
| CYM      | RETN      | MPO       | IL21    | UBAC2     |
| CYPB     | CYBB      | VWF       | IL21R   | PPP2R2C   |
| CYR61    | LDLR      | HMOX1     | IL22    | ACTL7B    |
| D17S136E | SERPINA12 | CD4       | IL3     | CX3CR1    |
| DAO1     | SENP3     | CXCL12    | IL32    | HSD11B1   |
| DCC      | KL        | CXCL8     | IL33    | VLDLR     |
| DF       | CPB1      | SERPINA12 | IL37    | TNFRSF11B |
| DHRS8    | BNIP3     | SDC1      | IL4     | SMAD3     |
| DI       | BDNF      | PF4       | IL5     | ADIPOQ    |
| DPP4     | MTHFR     | IL10      | IL6     | TRIM5     |
| DRO1     | GP6       | CYP2C9    | IL9     | OPN4      |
| DTR      | SLCO6A1   | NES       | ILK     | GOT1      |
| DTS      | PTAFR     | MTHFR     | INS     | CNTN3     |
| DUTT1    | ANXA1     | C3AR1     | IRAK1   | CXCL12    |
| DVR4     | STK11     | MFAP4     | IRAK4   | PTPN1     |
| ECE1     | APOA1     | MMP3      | IRF1    | BGLAP     |
| ECM2     | NAMPT     | CP        | IRF3    | IL17A     |
| EFL2     | HYOU1     | CMA1      | IRF4    | NCAM2     |

|        |          |         |          |                |
|--------|----------|---------|----------|----------------|
| EFNA1  | LY86     | POSTN   | IRF7     | ST3GAL4        |
| EFNA3  | AKT1     | APOH    | IRF9     | PON1           |
| EFNA5  | ENTPD1   | SIRT3   | ISG15    | LRP1           |
| ELA2   | MRC1     | NR1H3   | ITGA1    | PCDH8          |
| ELANE  | CREG1    | PRH1    | ITGA6    | SLC16A3        |
| ELC    | GDF11    | HAMP    | ITK      | FPR2           |
| ELN    | ACE2     | OSM     | IVNS1ABP | MACROD2        |
| EMAP2  | SERPINF1 | TFPI    | JAK1     | HABP2          |
| ENO1   | CD40LG   | UCN3    | JAK2     | MBTPS1         |
| ENO1L1 | EPOR     | CXCL16  | JAK3     | HSPG2          |
| ENPP1  | IFI44    | F3      | JUN      | CCDC7          |
| ENPP3  | KCNH2    | GSTM1   | KCNN4    | DLGAP2         |
| ENX2   | P2RY12   | CLU     | KLF2     | MCTP1          |
| EPB3   | ILF2     | STC2    | KLKB1    | NBEA           |
| EPLG1  | TXN2     | SFRP2   | KLRD1    | IL16           |
| EPLG3  | AVP      | ACE2    | KLRK1    | SLC39A12       |
| EPLG7  | PTPRC    | AGT     | KMO      | PELI2          |
| ERBA2L | NTRK1    | SIRT1   | LAG3     | EPB41L4B       |
| ERBB2  | P2RX4    | IL1B    | LCN2     | PRKD1          |
| ERP5   | TGFB3    | HSPB3   | LDB3     | GLO1           |
| EVN    | EEF2     | ZGLP1   | LDHA     | PLAU           |
| F10    | AGT      | MIF     | LEP      | PDGFRB         |
| F11    | ADM2     | NAMPT   | LEPR     | CD34           |
| F12    | HSPD1    | PON1    | LGALS1   | GDF15          |
| F2     | SRY      | CX3CL1  | LGALS3   | CD55           |
| F8VWF  | SCG2     | FGF21   | LGALS9   | MTOR           |
| F9     | WDR26    | ARSA    | LRPAP1   | CD160          |
| FAM55A | HDAC5    | TXNL1   | LTA      | AHSG           |
| FBLN7  | FAP      | RETN    | LY6E     | CACNA1C        |
| FBN    | SPP1     | PINK1   | MAEA     | NR1H2          |
| FBN1   | PIIF     | HPR     | MALT1    | NR4A1          |
| FBN2   | PBK      | HTRA2   | MAPK3    | MMP9           |
| FBRS   | GZMK     | IL37    | MATN1    | TFPI           |
| FBS    | OPHN1    | TNC     | MB       | TAC1           |
| FBS1   | VCL      | EPO     | MBL2     | MSANTD3-TMEFF1 |
| FCGRT  | LTA      | SLC17A5 | MBP      | TMEFF1         |
| FCRN   | PGF      | RAPGEF5 | MBTPS1   | LRBA           |
| FEEL2  | PLIN5    | PECAM1  | MCIDAS   | TAF3           |
| FELL   | STEAP4   | BDNF    | MDK      | VWA8           |
| FETUB  | TFEB     | EDN1    | MEFV     | KERA           |
| FEX2   | NFKBIA   | CSF2    | MIF      | NOD2           |
| FGA    | MSTN     | MMP2    | MLYCD    | FBP2           |
| FGB    | SERPINF2 | NOS2    | MMP1     | OGG1           |
| FGF1   | CXCL1    | CD151   | MMP12    | LEP            |
| FGF10  | NPR2     | ABO     | MMP2     | EPC2           |
| FGF12  | IL6ST    | FLRT2   | MMP3     | SERPINF1       |

|        |           |          |         |         |
|--------|-----------|----------|---------|---------|
| FGF12B | ATF4      | PRL      | MMP8    | LCAT    |
| FGF14  | C5AR1     | CORIN    | MMP9    | GRM3    |
| FGF16  | PECAM1    | SERPINF1 | MMRN1   | TSHZ3   |
| FGF17  | MAPKAPK2  | AGTR2    | MMUT    | PYGB    |
| FGF18  | MMP14     | GDA      | MOG     | TXNDC16 |
| FGF2   | EIF2S1    | UTS2     | MPG     | PFN1    |
| FGF20  | ABO       | CILP     | MPI     | PTPRC   |
| FGF22  | VCAM1     | GJA5     | MPO     | ICAM1   |
| FGF3   | LIPC      | SCARB1   | MS4A1   | CDKN2A  |
| FGF4   | EGLN1     | TLR3     | MSC     | OXR1    |
| FGF5   | ARSA      | ATXN7L3B | MSN     | PTPRG   |
| FGF6   | PRDX2     | CCR2     | MTOR    | IMPA2   |
| FGF7   | TNFAIP8L2 | ELN      | MYH6    | AKAP12  |
| FGF8   | ACR       | BSG      | MYH7    | ITPR2   |
| FGF9   | CR1       | CHGA     | MYL3    | GABRA5  |
| FGFA   | ZC3H12A   | ADM2     | MYLK    | GABRG3  |
| FGFB   | LGALS3    | NLRP3    | MYOM2   | GABRG1  |
| FGFBP  | MFN2      | CCS      | NCAM1   | CACNA1D |
| FGFBP1 | HTR2A     | SLC2A4   | NCR1    | GABRA2  |
| FGFBP3 | TLR3      | TFF3     | NELFCD  | CSF3R   |
| FGFBR  | MMP3      | CHIC2    | NFAT5   | CACNA1F |
| FGFR1  | BRD1      | SPP1     | NGF     | CACNA1S |
| FGFR2  | GRAP2     | TNFSF4   | NLRP3   | GABRA1  |
| FGFR3  | NR1H3     | IL17A    | NMT1    | GABRA3  |
| FGFR4  | PPARD     | PLAT     | NOD2    | IL33    |
| FGG    | NPPC      | IGF1     | NOS2    | HNF4A   |
| FHF1   | MT-RNR2   | AQP1     | NOS3    | XRCC4   |
| FHF4   | NLRP1     | MMD      | NPM1    | SPOPL   |
| FKN    | HSP90AB1  | MICA     | NPPA    | TRIM38  |
| FLG    | BMP2      | THBD     | NPPC    | NOXA1   |
| FLK1   | CTNNB1    | PDZK1    | NR3C1   | FOXP1   |
| FLT    | CLEC7A    | GSTA1    | NR3C2   | VCAM1   |
| FLT1   | CASP8     | PCYT1A   | NTF4    | IRGM    |
| FLT2   | PIK3CB    | GPER1    | OGN     | SOCS1   |
| FN     | PAPPA     | STAT3    | P2RX7   | SPATA13 |
| FN1    | GLRX3     | ALCAM    | PCNA    | ABCE1   |
| FNRA   | SLC2A4    | ANXA5    | PDCD1   | FRMD4A  |
| FNRB   | HSPA12B   | VASP     | PDCD4   | STXBP5L |
| FRP    | LCN2      | DBH      | PDGFC   | AHI1    |
| FRP    | JUN       | CTF1     | PDGFRA  | RIMS1   |
| FRP1   | PRDX5     | MTOR     | PDLIM7  | PLAUR   |
| FRT    | S1PR3     | B2M      | PI3     | HSH2D   |
| FST    | OPA1      | IL18     | PIK3CG  | CCL22   |
| FSTL1  | HRH2      | ICAM1    | PKP2    | PAPPA   |
| FUR    | MEFV      | PIK3CA   | PLA2G1B | IL1A    |
| FURIN  | S1PR2     | APEX1    | PLAU    | NPY     |
| FWP007 | EGR1      | NPPA     | PLP1    | GPR137C |



|          |         |         |          |         |
|----------|---------|---------|----------|---------|
| G0S19-1  | CRYAB   | AIDA    | PNKD     | IQSEC1  |
| G17      | KRT1    | HTR2A   | POR      | COG6    |
| G6B      | HTR3A   | CHI3L1  | POSTN    | HPCAL1  |
| GC       | NDRG2   | CREM    | PPARA    | CCL5    |
| GCP2     | ABCA1   | CAT     | PPARG    | P2RY6   |
| GDNF     | AGGF1   | HP      | PPIA     | ENG     |
| GGF      | JAK1    | ETV2    | PPP1R15A | CD40LG  |
| GHR      | DTNA    | SAA1    | PPP5C    | NFAT5   |
| GIG1     | CEBPZ   | HFE     | PRH1     | FGF23   |
| GIG24    | NLRX1   | TRPV2   | PRKCA    | MIR6792 |
| GIG25    | HSPA8   | PSMA6   | PRKCB    | XAB2    |
| GIG29    | TIMP3   | FURIN   | PRL      | CAMSAP3 |
| GJB1     | CFTR    | S100A12 | PROM1    | TANC2   |
| GLIF     | ANPEP   | SELE    | PRSS2    | CISD1   |
| GLUT2    | DNASE1  | KDR     | PRYP4    | RGN     |
| GLVR2    | GATA4   | MVD     | PSMB8    | SORT1   |
| GMCSF    | F2RL1   | INSRR   | PSME1    | NTN1    |
| GMRP     | MBTPS1  | GOT2    | PSME2    | MAF     |
| GOK      | CXCR6   | TXNIP   | PTEN     | LUZP2   |
| GP3A     | HMGB2   | SMAD7   | PTGS2    | SOST    |
| GP3B     | MAPK8   | VEGFB   | PTPRC    | ARID5B  |
| GP4      | NOD1    | SLC19A1 | PVR      | AP5Z1   |
| GPNMB    | MAMLD1  | ALOX5   | RAG1     | MUTYH   |
| GPR182   | PARK7   | IL6ST   | RAPGEF5  | CA6     |
| GPR48    | SLC22A4 | ADA     | RBM38    | STC2    |
| GRMP     | SOX7    | IGFBP1  | REN      | APOC3   |
| GRO      | MAPK7   | CYCS    | RHD      | TET2    |
| GRO1     | ALOX15  | SULT1E1 | RIPK1    | PF4     |
| GRO2     | ENPEP   | CDK9    | RIPK3    | IL6ST   |
| GROA     | RAMP2   | KIF6    | RNASE3   | NF2     |
| GROB     | MICU1   | PCNA    | RNPC3    | CRISP2  |
| GSN      | GLA     | GSK3B   | RPL17    | SFTPD   |
| HARE     | MAPK1   | F12     | RPTOR    | UTS2    |
| HBE245   | TRPM7   | CASP3   | RYR2     | DKK1    |
| HBEGF    | MAVS    | MUC16   | S100A8   | APOM    |
| HBNF1    | CETP    | ERCC8   | S100A9   | CMKLR1  |
| HBP17    | POR     | MDK     | SARS     | CD59    |
| HCF2     | BCL2A1  | LDLR    | SCARA3   | SLC17A3 |
| HCP      | SLC6A2  | GRK2    | SCD      | PLPP2   |
| HCP1     | CNPY2   | BCL2A1  | SELE     | P2RX7   |
| HCS24    | HSPB2   | CPB2    | SELL     | SPP1    |
| HDCMA22P | CCR2    | S100A6  | SEMA4A   | MMP12   |
| HDGF     | TRPM6   | SPARC   | SEMA7A   | MAS1    |
| HEGFL    | RIPOR2  | PTH     | SERPINA5 | BGN     |
| HELAD1   | HSPB1   | ADAM8   | SERPINC1 | MBL2    |
| HER2     | KIF2A   | EDNRB   | SERPINE1 | CST3    |
| HET      | MAP2K3  | SLC33A1 | SGCD     | TLR9    |

|          |         |            |           |           |
|----------|---------|------------|-----------|-----------|
| HF       | GAPDH   | CD36       | SLC17A5   | CPEB2     |
| HF1      | POSTN   | ALOX5AP    | SLC25A10  | C6orf118  |
| HF2      | PTPN1   | MMP19      | SLC25A4   | ABO       |
| HFE      | C5orf38 | SUV39H1    | SLC33A1   | SERPINA12 |
| HGF      | YES1    | CD59       | SLC7A11   | PDZK1     |
| HGFIN    | ATG3    | APOC3      | SMAD2     | SOAT2     |
| HGL      | SIRT5   | CFTR       | SMAD3     | TRIB3     |
| HLAH     | NUDT1   | ITLN1      | SOAT1     | LGALS3    |
| HMFN0376 | IKBKB   | SERPINA1   | SOCS1     | ZGLP1     |
| HMG1     | PLA2G10 | THBS4      | SOCS3     | FABP4     |
| HMG1L2   | AHSP    | ELANE      | SORBS1    | ANGPTL2   |
| HMGB1    | SPRR3   | APP        | SPARC     | S1PR1     |
| HP       | ATF3    | DNASE1     | SPP1      | MCIDAS    |
| HPTA     | RIT1    | DCN        | SPX       | SOD2      |
| HRG      | OGG1    | ADIPOQ     | SRSF2     | PHACTR1   |
| HRGA     | CD40    | CD40LG     | SSB       | AOC3      |
| HSD17B11 | CCS     | AOC1       | SST       | KCNJ3     |
| HSD17B12 | PCSK7   | CDKN2B-AS1 | STAT1     | PDYN      |
| HSD17B13 | DLL1    | AZU1       | STAT2     | CXCL16    |
| HSD17B7  | PADI4   | MMP14      | STAT3     | IL10      |
| HSMBPC   | NOX1    | TP53INP2   | STAT4     | STAT1     |
| HSPG2    | CASP9   | PLAU       | STAT6     | CD44      |
| HST      | MME     | ANG        | SULT1E1   | EDA       |
| HST2     | PPIA    | GLB1       | TACR1     | FABP3     |
| HSTF1    | NGB     | TMSB4X     | TACR3     | EDN1      |
| HSTF2    | FDPS    | COMT       | TBCA      | ELANE     |
| HTGL     | STOM    | ADAM17     | TDP2      | CBL       |
| HXB      | PLA2G7  | APOA5      | TFPI      | ANXA7     |
| HXBL     | SMAD4   | MBTPS1     | TG        | GSTM1     |
| IAPP     | HTR1B   | GPR4       | TGFB1     | F11R      |
| IBP2     | NR1H2   | TIMP3      | TGM2      | MAPK8     |
| IBP3     | CDK2    | MAPK3      | THBS1     | IL5       |
| IBP4     | AHR     | POR        | THBS2     | CCN1      |
| IBP5     | GSDMD   | ESM1       | TICAM1    | CYP1B1    |
| IBP6     | MSLN    | NFKBIL1    | TIMP1     | IL18      |
| IF       | CTSG    | CCN1       | TLR2      | LRP6      |
| IFNB2    | ACHE    | CPB1       | TLR3      | FGF2      |
| IFNG     | KCNQ1   | GJA4       | TLR4      | IRF5      |
| IGDCC1   | MMRN1   | ABCB1      | TLR7      | AGTR2     |
| IGFBP10  | ADRB3   | CTSD       | TLR9      | CASP1     |
| IGFBP2   | P2RX2   | ALB        | TMPRSS2   | LECT2     |
| IGFBP3   | KLKB1   | PDGFRA     | TNC       | TRPV1     |
| IGFBP4   | CYSLTR2 | GSN        | TNF       | TIGIT     |
| IGFBP5   | FAM168B | PTPRC      | TNFAIP3   | IL4       |
| IGFBP6   | EDNRA   | TTR        | TNFRSF11B | DPP4      |
| IGFBP8   | NOX4    | CFH        | TNFRSF14  | APOB      |
| IHH      | PNPLA2  | SLC9A1     | TNFRSF18  | ADAMTS5   |

|          |         |          |          |          |
|----------|---------|----------|----------|----------|
| IIGP5    | PNOC    | CRLS1    | TNFRSF1A | ENHO     |
| IL10     | STAT6   | NTN1     | TNFRSF1B | TRPC3    |
| IL12B    | STAT5A  | S100A8   | TNFRSF25 | EFNA5    |
| IL2      | SGK1    | LGALS1   | TNFRSF8  | ANO3     |
| IL3      | KARS    | S100B    | TNFSF11  | NUTM2F   |
| IL4      | LPA     | BGN      | TNFSF4   | ERICH1   |
| IL5      | TXNL1   | PARP1    | TNFSF8   | RCAN1    |
| IL6      | SULT1E1 | CA3      | TNFSF9   | SOCS3    |
| IL7      | VIP     | CTSS     | TNNI3    | UMOD     |
| IL8      | CDK9    | SCUBE1   | TNNT2    | CRP      |
| ILC      | GAST    | RNASE3   | TOR1A    | SMAD2    |
| IMPG2    | CPA1    | ACSM3    | TRAF6    | TLR5     |
| IMPT1    | SOCS3   | HSPB1    | TREX1    | HGF      |
| INHBA    | ATP5F1  | LPL      | TRIM21   | SLC10A2  |
| INP10    | KCNMA1  | SERPINF2 | TRIM63   | SEMA4D   |
| INSR     | CPOX    | SOAT1    | TSPO     | FMO3     |
| INT1     | TCP1    | IFNG     | TTN      | MTHFR    |
| INT2     | ST8SIA4 | ITGA2    | TTR      | NR1H4    |
| IPM200   | SLC17A5 | FASLG    | TXN      | MMP10    |
| IRGC     | SCD     | OLR1     | UCHL1    | VEGFA    |
| IRGC1    | HDGF    | SCN5A    | VCAM1    | ZEB1     |
| ITAC     | GPX1    | BAG3     | VCL      | SAT1     |
| ITFG1    | CTH     | TLR2     | VDR      | MMP2     |
| ITGA1    | PXDN    | CTNNB1   | VEGFA    | MMP8     |
| ITGA5    | NCL     | ADM      | VIM      | PRKAA1   |
| ITGAM    | SOD3    | GNB3     | VIP      | KL       |
| ITGAV    | EFNA1   | THBS1    | XCL1     | PRKCB    |
| ITGB1    | TRIM63  | PTGIS    | XPR1     | FAM49A   |
| ITGB3    | CA1     | CHAT     | ZBTB12   | ACER1    |
| ITIH3    | CALR    | FGF1     | ZC3H12A  | SHH      |
| ITIL     | HDAC6   | GAP43    | ZC3HAV1  | ISOC1    |
| ITM      | BCLAF1  | AOPEP    |          | TNFSF11  |
| ITM2B    | PON1    | DMD      |          | ALB      |
| JTK2     | NKX2-5  | BRD1     |          | HMBS     |
| JTK4     | SLN     | SCD      |          | GPR132   |
| KAL      | HPS1    | SLC5A5   |          | ADARB2   |
| KAL1     | CD151   | KLK1     |          | PPARD    |
| KALIG1   | DDAH1   | F7       |          | SERPINE1 |
| KDR      | NFAT5   | CCNA2    |          | DCN      |
| KGF      | CASR    | KLF4     |          | BDNF     |
| KGFLP1   | FGF23   | GUSB     |          | ATF3     |
| KGFLP2   | DAXX    | IL18BP   |          | GJA1     |
| KGFR     | ARC     | TIMP2    |          | ABCG1    |
| KIAA0253 | DYSF    | CASP1    |          | APOC1    |
| KIAA0366 | MASP2   | ITGB2    |          | TPT1     |
| KIAA0533 | GPI     | LEPR     |          | PADI4    |
| KIAA0548 | IGFBP4  | CYP4F2   |          | TIMP1    |

|          |          |          |          |
|----------|----------|----------|----------|
| KIAA0786 | SLPI     | IL2      | GPX1     |
| KIAA0813 | CLU      | RYR1     | PON2     |
| KIAA1149 | SLC5A5   | PGF      | HSPD1    |
| KIAA1312 | TNFRSF1A | HMBS     | DLK1     |
| KIAA1346 | HSPA5    | NOS1     | FAM174A  |
| KIAA1419 | IGF2     | PIM1     | SETBP1   |
| KIAA1445 | FSTL1    | CYP19A1  | ZFHX4    |
| KIAA1907 | CYP2E1   | RIPK3    | S100A9   |
| KNG      | TICAM1   | MRTFA    | FABP5    |
| KNG1     | PIAS1    | CADM1    | CD69     |
| KS3      | EMP1     | MGP      | IL17D    |
| KSAM     | EPRS     | ADAMTS1  | TES      |
| KUB1     | IL2      | OGN      | IL2      |
| LACI     | KDR      | LIPC     | CSF2     |
| LAG1     | EMD      | MRC1     | QDPR     |
| LAMA     | PRL      | APOB     | MCPH1    |
| LAMA1    | AHSG     | ABCC9    | CCR5     |
| LAMA2    | DIAPH1   | CKLF     | MAPK7    |
| LAMA3    | SLC25A1  | ANGPT1   | PHLDA1   |
| LAMA4    | MPI      | BCHE     | PLIN2    |
| LAMA5    | NR1H4    | SFRP5    | CTLA4    |
| LAMB2T   | IRAK1    | DPT      | POMC     |
| LAMBR    | TNFRSF1B | A2M      | VIM      |
| LAMC2    | DES      | NR1H2    | NOTCH1   |
| LAMM     | HAMP     | SDC4     | CXCR6    |
| LAMNA    | DNAH5    | ALOX15   | NPPA     |
| LAMNB2   | PBRM1    | GSTP1    | FN1      |
| LAMR1    | SELENOP  | KLKB1    | SREBF1   |
| LCRISP2  | P2RY11   | TREM1    | HIF1A    |
| LDLR     | DST      | SOD2     | RASEF    |
| LEC1     | APAF1    | HSPD1    | TRPS1    |
| LERK1    | PRDX1    | LAG3     | HIVEP2   |
| LERK3    | GPB1     | ABCA1    | FOLR2    |
| LERK7    | GDF15    | PFN1     | SPON2    |
| LF       | CCL5     | FLT1     | MMP1     |
| LGALS9   | TIMP1    | CCL11    | PARP1    |
| LGR4     | F2       | CYP11B2  | CMA1     |
| LIFR     | HSPB3    | LRP1     | MFGE8    |
| LIPC     | ANG      | GP1BA    | TNC      |
| LIPD     | SUCNR1   | PI3      | TIMP3    |
| LIPG     | AKIP1    | LPP      | JAM3     |
| LIS1     | SMPD1    | S100A4   | HHIP     |
| LNHR     | CFB      | PRKCA    | INF2     |
| LNPEP    | RNLS     | BRINP3   | KIF20B   |
| LPC1     | DDIT3    | HSPG2    | GLRX3    |
| LPC2D    | PCBD1    | TNFRSF1A | LIPG     |
| LPHH1    | CDS1     | CCR5     | ARHGEF26 |

|        |          |          |          |
|--------|----------|----------|----------|
| LPHN2  | GHRL     | IL11     | APOD     |
| LPL    | PLG      | HSPB8    | IRS2     |
| LRPAP1 | FGFR3    | NEIL3    | SMPD3    |
| LST3   | NTS      | RFLNA    | OVOL2    |
| LTBP1  | NFE2L2   | MAZ      | CDH10    |
| LTF    | PSMA2    | MAPKAPK5 | AIF1     |
| LTN    | CCR5     | TF       | IGF1     |
| LYAM1  | SESN2    | F8       | GJB5     |
| M6S1   | SULT4A1  | CYBA     | MMRN2    |
| MAPT   | PKN1     | CAST     | MMP16    |
| MAPTL  | TPO      | PDE5A    | NPVF     |
| MBL    | MAP2K1   | DEGS1    | CBLN1    |
| MBL2   | OPN1LW   | GHSR     | ADAM8    |
| MBP    | LPO      | PLA2G4A  | IGF2     |
| MBPB1  | SELPLG   | LGALS2   | APOA4    |
| MCP1   | IRAK4    | ENPEP    | APP      |
| MCP2   | MRTFA    | IL4      | PON3     |
| MCP3   | F8       | NPY      | CFP      |
| MCP4   | CTSB     | CYP1A2   | LIPC     |
| MCT1   | FGF19    | OGA      | ST13     |
| MCT8   | SKIL     | CNR2     | LTA      |
| MDC    | ANO1     | HRG      | DGAT1    |
| MDCR   | NDRG4    | CENPJ    | FOXP3    |
| MDF2   | KLF5     | F2RL1    | VEGFC    |
| MDK    | TSPO     | HPGDS    | ALOX15   |
| MDR1   | PVR      | CCDC88A  | RYR3     |
| MDR3   | UCP3     | ATP2A2   | LPAR1    |
| MDS    | NUP43    | C4B      | RHOF     |
| MDU1   | OGA      | PROCR    | TNFRSF1A |
| MEGF4  | S100A4   | AQP4     | ESR2     |
| MER6   | NTRK2    | CD40     | ADAM17   |
| MET    | CCN1     | FABP2    | NISCH    |
| METH1  | FGF5     | ADD1     | SCD      |
| METH2  | CASZ1    | ANXA1    | VNN1     |
| MGCA   | CDKN1A   | IRF3     | GJA5     |
| MGSA   | HIF3A    | TIMP4    | COG2     |
| MIF    | TNNI3K   | LBP      | CD163    |
| MIP1A  | STAT1    | CX3CR1   | LIPE     |
| MIP1B  | VDR      | UGT1A1   | CYP7A1   |
| MIP2A  | ST13     | ALAS2    | ELAVL1   |
| MIP3   | SIRT6    | ERAL1    | PTPN22   |
| MIP3B  | LRP1     | MTR      | SHBG     |
| MIP5   | SLC22A12 | MYL3     | CCR6     |
| MK1    | ADI1     | SOCS3    | HSP90AB1 |
| MLC2   | G6PD     | P2RX7    | SLC33A1  |
| MLN19  | SETD7    | AIRE     | EZH2     |
| MMIF   | S100A8   | IL15     | NTRK2    |

|       |          |          |          |
|-------|----------|----------|----------|
| MMP14 | NES      | PLAUR    | KDM5D    |
| MMP2  | TWSG1    | GATA4    | NOS2     |
| MMP7  | GHSR     | MTTP     | CD80     |
| MMP9  | SERPINC1 | CR1      | AQP1     |
| MPB1  | ACVR2B   | IL1RN    | FCGR2B   |
| MPIF1 | SPARC    | ITGB1BP2 | CCL15    |
| MPIF2 | PON2     | RBP1     | GOT2     |
| MPO   | ANGPT2   | PLA2G7   | GSK3A    |
| MPSL1 | PSEN1    | VCAN     | PLPP3    |
| MRLC1 | TNS1     | CREG1    | KDR      |
| MRP6  | SIRT2    | FST      | SERPIND1 |
| MSK12 | FOS      | GZMB     | CSF1     |
| MSK8  | CLEC6A   | STS      | VAMP8    |
| MTBT1 | TGM2     | SCG2     | APLN     |
| MXR   | C1QTNF1  | DDAH1    | FASLG    |
| MYL9  | ELOVL6   | ADI1     | NAXE     |
| MYRL2 | STOML2   | IL23R    | TERT     |
| NACP  | MANF     | EPHB2    | IL9      |
| NAT1  | FHL2     | TET1     | CORIN    |
| NAT3  | TRPV4    | ENPP1    | BMP4     |
| NAV2  | SP4      | KL       | LTB4R    |
| NBC   | ABCC6    | FTO      | HPSE     |
| NBC1  | LRP6     | LIF      | APLNR    |
| NBCE1 | RALA     | BID      | RAPGEF5  |
| NCAM  | SULT1A3  | DENR     | TNFSF4   |
| NCAM1 | CPSF4    | IGF2     | LOX      |
| NCC1  | ADM      | CAV1     | CTSS     |
| NCC3  | MRRF     | CXCL10   | GPBAR1   |
| NCSTN | CDKN2A   | CTSB     | MS4A1    |
| NDF   | DKK1     | F5       | CYP2C9   |
| NEGF1 | SULT2A1  | NDNF     | MMP13    |
| NEGF2 | STS      | NR0B1    | CAV1     |
| NEU   | MAEA     | FCGR2A   | NOX1     |
| NGL   | SLC25A3  | FAIM2    | MAPK9    |
| NKSF2 | S1PR1    | P2RY2    | PPIA     |
| NLT   | STH      | KNG1     | ALDH2    |
| NMB   | FZD2     | HDAC5    | MAFB     |
| NOG   | PIK3CD   | CEACAM5  | STAT4    |
| NPPS  | CRH      | KCNE1    | SLC17A5  |
| NRG1  | TBCD     | NFKB1    | GJA4     |
| NRP   | IL18BP   | TP53     | OGN      |
| NRP1  | GSC      | ARG1     | S100A12  |
| NRTN  | EGLN3    | PTPN1    | ARG2     |
| NT5   | RNF146   | SERPINA4 | MTHFD2   |
| NT5E  | CNR1     | FKBP1B   | ITLN1    |
| NTCP  | CCL7     | BBOX1    | GPI      |
| NTE   | AIF1     | BRCA1    | KLK1     |

|          |          |         |          |
|----------|----------|---------|----------|
| NTN1     | CCL19    | PCBD1   | PRL      |
| NTN1L    | RRM1     | LRG1    | FLT1     |
| NTT      | KLF15    | CDH2    | KLF2     |
| OAT2     | IHH      | CD69    | AEBP1    |
| OCIF     | NOTCH1   | LOX     | ACKR3    |
| OCLN     | MCF2L    | NRG1    | SLC9A1   |
| ODZ1     | SMAD7    | F11     | CYBA     |
| OP1      | FGFR2    | VAMP8   | BMP7     |
| OPG      | TIMP2    | FGF9    | PNPLA2   |
| ORAI1    | PCYT1A   | CYP2C8  | IDO1     |
| ORCTL2   | CCL18    | ERBB4   | GLP1R    |
| OSF2     | HBD      | NPPC    | TAGLN    |
| OTASE    | ULK1     | UCN     | SELL     |
| OZF      | AGXT     | UMOD    | S1PR2    |
| P4HB     | PRKCB    | CCL21   | XPR1     |
| P5       | RUNX1    | LYST    | P4HB     |
| PACE     | RTCA     | LPAR3   | ACSL1    |
| PACE4    | RAF1     | IL13    | CD68     |
| PAFAH1B1 | AOC3     | DYRK1A  | ADK      |
| PAFAHA   | INHBA    | CSF1    | SERPINA5 |
| PAI1     | CD274    | JUN     | ADAMTS7  |
| PAIRBP1  | CRBN     | BTN2A1  | PTK2     |
| PALB     | RHEB     | STC1    | LEPR     |
| PAN1B    | PTN      | ANGPT2  | ESAM     |
| PARK1    | TJP1     | CNR1    | PLAT     |
| PBP      | MLYCD    | ACR     | XBP1     |
| PC1      | HGS      | LTA4H   | LPL      |
| PC5      | DMD      | NPY4R   | TIMP2    |
| PC6      | WT1      | ENO3    | PGF      |
| PCFT     | BDKRB2   | CDKN2A  | CDH13    |
| PCI      | STC1     | NNT     | SORL1    |
| PCOLCE2  | NCAM1    | TGFB3   | CDK9     |
| PCPE2    | HRC      | RECQL5  | TXN      |
| PCSK3    | SH3BP4   | ADAMTS4 | SYK      |
| PCSK5    | BMP4     | EFNA1   | APOA2    |
| PCSK6    | MC3R     | HBD     | ROCK1    |
| PDCD5    | MPG      | CIITA   | P2RY13   |
| PDGF1    | MCAT     | ABCG2   | PLIN1    |
| PDGF2    | TP53INP2 | FABP4   | KLRK1    |
| PDGFA    | ACADV1   | E2F1    | CYP2J2   |
| PDGFB    | NTN1     | NOX5    | OSM      |
| PDI      | VIM      | IGFBP3  | TXNL1    |
| PDIA1    | RNH1     | EDA     | PECAM1   |
| PDIA6    | CD47     | GPR17   | COMT     |
| PDNP1    | ADA      | MCIDAS  | SGMS2    |
| PDNP3    | EPHB4    | PLK3    | SOAT1    |
| PEBP     | SPHK1    | LAIR1   | LBP      |

|         |         |          |           |
|---------|---------|----------|-----------|
| PEBP1   | COMMD1  | STIM1    | LILRB4    |
| PECAM1  | ADORA2B | HMGB2    | LGMN      |
| PEDF    | MVD     | NRDC     | THBD      |
| PF4     | BCL2L11 | PON2     | DDX58     |
| PF4V1   | TMEFF2  | AKT1     | SMAD7     |
| PFC     | TPT1    | DCTD     | ADM2      |
| PFD     | GFAP    | HCN4     | CRH       |
| PGF     | ITPR2   | SORBS3   | CD248     |
| PGFL    | TF      | C3       | POSTN     |
| PGY1    | NOTCH3  | MMP28    | NOS1      |
| PGY3    | ELANE   | IRAK3    | CXCR2     |
| PI      | CDH5    | AMY1C    | KCNN4     |
| PI7     | SMAD2   | TFAM     | PCSK7     |
| PIG35   | ITGAM   | HSD11B1  | MMRN1     |
| PIGR    | STIM1   | ZNF627   | ICOS      |
| PIT2    | ASGR2   | HSPA12B  | TNNT2     |
| PLA2B   | SST     | CD180    | APOA5     |
| PLA2G2A | PTH     | PEAR1    | LDB2      |
| PLA2G5  | AOPEP   | POU2F3   | IL22      |
| PLA2L   | KRAS    | DPYSL2   | APOL1     |
| PLANH1  | STIL    | MYDGF    | F3        |
| PLANH3  | PLA2G4A | CD163    | GSTO1     |
| PLAT    | MMD     | CYP3A4   | CHUK      |
| PLAU    | TNNT1   | SGCA     | CCL11     |
| PLBD1   | HMOX2   | SERPING1 | ST6GAL1   |
| PLG     | BAMBI   | SERPINA6 | TNFAIP8L2 |
| PLGF    | PTHLH   | MTAP     | FUT7      |
| PMCA1   | EIF2AK1 | MAPK7    | HCAR2     |
| PN1     | RAPGEF3 | APOD     | MYOCD     |
| PO4DB   | NTHL1   | SERPINH1 | FCGR2A    |
| POMFIL2 | FOXP3   | EGFR     | CTSK      |
| PON     | ANK1    | TTL      | NOX4      |
| PON1    | GH1     | GAPDH    | IFNB1     |
| PON2    | CHUK    | VTN      | CD27      |
| PON3    | MT-ND2  | TBXA2R   | NAT2      |
| POSTN   | ANXA6   | JAK2     | EPHB2     |
| PP4     | NPY2R   | SYT1     | TF        |
| PPBP    | CADM1   | CYBB     | RPS3A     |
| PIIB    | PLD6    | SH2B1    | CD38      |
| PRDX4   | BCL2    | CLEC3B   | ATG5      |
| PRELP   | FPR2    | SPHK1    | HRH1      |
| PRG2    | GLB1    | CXCL9    | LIPA      |
| PRIP    | GUSB    | CNP      | CD6       |
| PRL     | PTK2    | SETD2    | MVP       |
| PRNP    | PRKAA2  | IL9      | PTAFR     |
| PRO0309 | AIFM1   | IMMT     | FURIN     |
| PRO0684 | AK3     | PPY      | IGF1R     |



|          |         |           |          |
|----------|---------|-----------|----------|
| PRO1400  | TP53    | HSPA5     | JUP      |
| PRO2061  | ASGR1   | F11R      | TWIST1   |
| PRO2209  | ESD     | TNFSF18   | TRPV4    |
| PRO2290  | TCHP    | ADRA2B    | AHSP     |
| PROC     | CD36    | FSTL1     | TRAF1    |
| PROCI    | UBQLN1  | FGB       | ADAMTS1  |
| PRP      | CYP2J2  | KLK3      | CCL17    |
| PRSS1    | FGL2    | TNFRSF10B | CLEC5A   |
| PS1      | TCF21   | FLNA      | ADAM10   |
| PSEC0029 | ETV3    | GSTCD     | CXCL8    |
| PSEC0101 | PLEK    | XRCC3     | GSK3B    |
| PSEC0139 | TACR1   | KBTBD7    | S100A8   |
| PSEN1    | CCL20   | ADIPOR2   | EMP1     |
| PSNL1    | IL4     | CDKN1A    | IGFBP3   |
| PTCH     | OPRM1   | MAEA      | TICAM1   |
| PTCH1    | LPCAT3  | MMRN1     | JAK2     |
| PTN      | CREB3   | NOX4      | CD28     |
| PTPRC    | RARRES2 | CD28      | PCYT1B   |
| PTX2     | CASP2   | GCLM      | MEFV     |
| PUMP1    | MET     | BECN1     | IL19     |
| PWD      | UBR5    | SDC2      | PRH1     |
| PWTSR    | CABIN1  | FADS2     | GZMB     |
| RAINB1   | CD59    | SGK1      | LGALS1   |
| RAP3     | APOB    | HPS1      | SMPD1    |
| RASF-A   | SYT1    | APOA4     | CDKN2B   |
| RNASE5   | CALCRL  | RRS1      | CLSTN2   |
| ROBO1    | F7      | MARCKS    | MMP14    |
| RPL22    | EIF2AK2 | P3H3      | CD180    |
| RPL29    | ELN     | PTK2      | ITGA5    |
| RPSA     | GRN     | SULT2A1   | PRDX4    |
| RSPO1    | TBXA2R  | UCN2      | RPL17    |
| RSPO2    | CD38    | TNNT1     | SRY      |
| RSPO3    | AK2     | GCLC      | CCL4     |
| RSPO4    | VCP     | EPHX1     | CPB2     |
| SAA1     | NUCB2   | MAP2K1    | RGCC     |
| SAA2     | GCH1    | TCP1      | CASP3    |
| SARP2    | IL37    | CCL5      | GH1      |
| SCDR9    | CXCL17  | PRDX2     | CD86     |
| SCN5A    | DRD2    | THPO      | IGFBP1   |
| SCYA1    | APP     | ACKR3     | ENPEP    |
| SCYA10   | CXCL16  | FBLN2     | ARSA     |
| SCYA11   | MYC     | WIF1      | TNFRSF25 |
| SCYA13   | PGAM2   | DKK3      | SPARC    |
| SCYA15   | CBFA2T2 | AZIN2     | ECE1     |
| SCYA17   | SRC     | NTS       | STEAP4   |
| SCYA19   | SAT1    | NOC2L     | FTO      |
| SCYA2    | LTB4R   | AK1       | ANGPTL3  |

|           |         |          |          |
|-----------|---------|----------|----------|
| SCYA21    | NR3C2   | SLCO1B1  | BSCL2    |
| SCYA22    | MYOCD   | ST3GAL4  | MAP3K5   |
| SCYA23    | TTR     | TXNL4B   | MAEA     |
| SCYA24    | PGRMC1  | MSTN     | GHSR     |
| SCYA25    | ADORA1  | TCFL5    | INSR     |
| SCYA27    | ANGPTL3 | SERPIND1 | LPCAT3   |
| SCYA28    | XBP1    | CCL4     | CAT      |
| SCYA3     | SYNE1   | SHBG     | SREBF2   |
| SCYA4     | TLX1NB  | LGALS9   | PSRC1    |
| SCYA5     | CLCN2   | OTOR     | PXDN     |
| SCYA6     | TRPC1   | XIAP     | CADM1    |
| SCYA7     | SHH     | SCAI     | PSD      |
| SCYA8     | HSPG2   | PDE4D    | MYRF     |
| SCYB1     | HSF1    | SUMO1    | MTTP     |
| SCYB10    | TNS3    | ELAVL1   | AHRR     |
| SCYB11    | IFIT2   | IL1A     | MAPK3    |
| SCYB13    | SHD     | MATN1    | EDNRB    |
| SCYB16    | TPR     | SORT1    | S100A7   |
| SCYB2     | CFI     | ACP5     | IRS1     |
| SCYB4     | FGFR4   | SLC22A4  | IRF2BP2  |
| SCYB4V1   | TRPM4   | RAMP1    | CCL19    |
| SCYB6     | HSPB8   | SARS     | C1QL3    |
| SCYB7     | CMKLR1  | IL32     | NCEH1    |
| SCYB9B    | MFN1    | SRF      | CP       |
| SCYC1     | ILK     | CCL16    | GSS      |
| SCYD1     | S100B   | ABCD1    | PGLYRP1  |
| SCYE1     | GSN     | ITGB1    | F2       |
| SDF1      | ARID3A  | PHGDH    | ADAM33   |
| SDF1A     | BCHE    | ARC      | CCR7     |
| SDF1B     | MAPK14  | DEFA1    | MMP3     |
| SELL      | TFAM    | BGLAP    | SH2B3    |
| SELP      | LDHB    | TLR9     | ZNF202   |
| SEMA5A    | CD4     | IL17D    | CTSL     |
| SEMA5B    | PDC     | FBXO32   | LRP2     |
| SEMAF     | PICALM  | CCL3     | IL23R    |
| SEMAG     |         | BMP2     | CD70     |
| SERBP1    |         | TLR7     | DDR1     |
| SERPINA1  |         | OSTN     | TBXAS1   |
| SERPINA10 |         | SST      | NOD1     |
| SERPINA3  |         | TRPC4    | GNMT     |
| SERPINA5  |         | GC       | GATA4    |
| SERPINA6  |         | CAV3     | SLC25A1  |
| SERPINA8  |         | CCL20    | CES1     |
| SERPINC1  |         | SLC25A3  | IL17RA   |
| SERPIND1  |         | DCD      | MGLL     |
| SERPINE1  |         | ILF3     | SERPINC1 |
| SERPINE2  |         | DCC      | TCF7L2   |

|          |  |          |  |           |
|----------|--|----------|--|-----------|
| SERPINF1 |  | SLC25A10 |  | ANXA5     |
| SERPING1 |  | LPO      |  | CD99      |
| SFRP1    |  | IRS1     |  | MIF       |
| SHH      |  | KCNMA1   |  | CYP27A1   |
| SIAT1    |  | MAP3K3   |  | RELN      |
| SIS      |  | STAT1    |  | PSMA7     |
| SLC10A1  |  | FOXP3    |  | CAPN10    |
| SLC12A9  |  | BMP10    |  | HBEGF     |
| SLC16A1  |  | HUNK     |  | TLR6      |
| SLC16A2  |  | ARRB1    |  | CXCR3     |
| SLC20A2  |  | GOSR2    |  | FGF1      |
| SLC22A1  |  | CSF1R    |  | CYP19A1   |
| SLC22A18 |  | CCR1     |  | PRLR      |
| SLC22A1L |  | MAPKAPK2 |  | CDH5      |
| SLC22A7  |  | SRI      |  | CXCL1     |
| SLC2A2   |  | TNFAIP6  |  | CISH      |
| SLC30A1  |  | CASP8    |  | IGHD      |
| SLC38A3  |  | LCAT     |  | ITCH      |
| SLC38A4  |  | NFATC3   |  | B2M       |
| SLC39A4  |  | FLT3     |  | ACR       |
| SLC3A2   |  | CD2      |  | ADAMTS13  |
| SLC46A1  |  | ADRA2A   |  | NFE2L2    |
| SLC4A1   |  | FETUB    |  | TFAP2A    |
| SLC4A4   |  | FXYD1    |  | GET4      |
| SLC7A2   |  | HABP2    |  | CXCL10    |
| SLCO1A2  |  | SPRR3    |  | APOH      |
| SLIL1    |  | KRT75    |  | LRP5      |
| SLIL3    |  | CIART    |  | TEK       |
| SLIT1    |  | CELF1    |  | F11       |
| SLIT2    |  | TNNI3K   |  | ABCA2     |
| SLPI     |  | PIK3C2A  |  | SCAI      |
| SLRR1A   |  | GHRL     |  | ZG16B     |
| SLRR2A   |  | HSF1     |  | NCF1      |
| SMDF     |  | CHP1     |  | USF1      |
| SN1      |  | PRKD1    |  | SERPINA1  |
| SNAT3    |  | XPR1     |  | TNFRSF13B |
| SNAT4    |  | SELL     |  | ECSCR     |
| SNCA     |  | KRT76    |  | NEXN      |
| SOD1     |  | MAF      |  | JAML      |
| SOD3     |  | ADAM15   |  | HSD11B2   |
| SORT1    |  | GRAP2    |  | TNFSF8    |
| SOST     |  | CXCR3    |  | NR0B2     |
| SRPSOX   |  | IGF1R    |  | LSS       |
| ST6GAL1  |  | VLDLR    |  | GPBP1     |
| STAB2    |  | APOM     |  | CYP26B1   |
| STAMP2   |  | FAP      |  | STK11     |
| STEAP4   |  | KLRK1    |  | NR1H3     |

|           |  |          |  |          |
|-----------|--|----------|--|----------|
| STEERIN2  |  | SLC22A5  |  | NR2F2    |
| STG       |  | SMTN     |  | RGS1     |
| STIM1     |  | BRD4     |  | CYP2C8   |
| SYNGR1    |  | SLPI     |  | CCL21    |
| TALL2     |  | KDM1A    |  | CIC      |
| TARC      |  | CTSK     |  | LGALS3BP |
| TAU       |  | BTG3     |  | JAZF1    |
| TECK      |  | CYP2D6   |  | IRF3     |
| TF        |  | CD68     |  | CCL24    |
| TFAR19    |  | ILK      |  | PLA2G15  |
| TFPI      |  | CYP4A11  |  | CRY1     |
| TFPI1     |  | CSAD     |  | MAPKAPK2 |
| TFR2      |  | ACVR1B   |  | IL15     |
| TFRC      |  | ENTPD1   |  | GP6      |
| TG        |  | PSD4     |  | P2RY2    |
| TGB1      |  | HRH3     |  | AKT1     |
| TGFB      |  | KCNQ1    |  | NPC1     |
| TGFB1     |  | GP5      |  | PREX1    |
| TGFB2     |  | CD27     |  | RIPK3    |
| TGFBR3    |  | RNLS     |  | TGFB111  |
| TGM2      |  | MTHFD1   |  | ANGPTL6  |
| THBGB1    |  | HSP90AB1 |  | BECN1    |
| THBS1     |  | ABCG1    |  | SEC14L2  |
| THBS2     |  | TTN      |  | SSB      |
| THBS3     |  | ACHE     |  | HDAC3    |
| THBS4     |  | MAP3K5   |  | F2RL1    |
| THSD2     |  | TRIM63   |  | HSPA1A   |
| TIMP3     |  | ANXA13   |  | RNF5     |
| TIP       |  | ADH1C    |  | SCUBE2   |
| TKF       |  | WT1      |  | CREB3L3  |
| TM14      |  | SMAD2    |  | PNPLA3   |
| TMEM142A  |  | CPOX     |  | GYPC     |
| TNC       |  | DRD1     |  | HAVCR1   |
| TNF       |  | ALPI     |  | AHR      |
| TNFA      |  | PEPD     |  | CD81     |
| TNFAIP4   |  | AMPD1    |  | TNFRSF8  |
| TNFAIP6   |  | CCL22    |  | PRDX6    |
| TNFAIP9   |  | HCN2     |  | CYP1A1   |
| TNFRSF11B |  | ADAMTS2  |  | ROCK2    |
| TNFSF13   |  | ANPEP    |  | GUSB     |
| TNFSF2    |  | PDCD4    |  | EEF2K    |
| TNM1      |  | NOD2     |  | SERPINF2 |
| TNX       |  | BCL2L11  |  | C5AR1    |
| TNXB      |  | PXDN     |  | TTC39B   |
| TNXB1     |  | NUCB2    |  | MGP      |
| TNXB2     |  | RYR2     |  | GPX4     |
| TPS1      |  | GCGR     |  | CBS      |

|                         |  |         |  |          |
|-------------------------|--|---------|--|----------|
| TPS2                    |  | CD63    |  | PTHLH    |
| TPS2                    |  | PDCD1   |  | AOPEP    |
| TPSAB1                  |  | CCR4    |  | PKM      |
| TPSB1                   |  | CXCR2   |  | BCHE     |
| TPSB2                   |  | AXL     |  | EPHB1    |
| TRDX                    |  | SLC6A18 |  | FLNA     |
| TRP1                    |  | ABCG5   |  | FUT4     |
| TRX                     |  | KCNN4   |  | GPR55    |
| TRX1                    |  | TYMP    |  | VEGFD    |
| TRY1                    |  | APOA2   |  | MAZ      |
| TRYP1                   |  | ATF6    |  | TFPI2    |
| TSG6                    |  | SSB     |  | HSPA5    |
| TSP                     |  | EGLN1   |  | PRDX2    |
| TSP1                    |  | PCSK5   |  | STS      |
| TSP2                    |  | AVP     |  | CEBPB    |
| TSP3                    |  | ANGPTL3 |  | TAP1     |
| TSP4                    |  | AGER    |  | TFF3     |
| TSSC5                   |  | SORBS2  |  | LTA4H    |
| TTR                     |  | QDPR    |  | COPS5    |
| TXN                     |  | INSIG2  |  | GRK5     |
| TXNDC7                  |  | GLI1    |  | NOS1AP   |
| UND                     |  | PKM     |  | EPO      |
| UNQ161/PRO187           |  | MET     |  | HFE      |
| UNQ1725/PRO9925         |  | NPAT    |  | AR       |
| UNQ1840/PRO3566         |  | NTRK2   |  | LPAR4    |
| UNQ1874/PRO4317         |  | IL19    |  | CYP2C19  |
| UNQ207/PRO233           |  | FPR1    |  | ADD1     |
| UNQ217/PRO243           |  | SLC8A1  |  | SGCA     |
| UNQ250/PRO287           |  | CHRNA5  |  | TNFRSF18 |
| UNQ2500/PRO5800         |  | CDA     |  | TSPYL2   |
| UNQ2563/PRO6243         |  | DGKZ    |  | ERN2     |
| UNQ2748/PRO6487         |  | PRDX5   |  | GPLD1    |
| UNQ2759/PRO6714         |  | CTSA    |  | SIGLEC1  |
| UNQ2914/PRO1156/PRO9783 |  | C5orf38 |  | CTF1     |
| UNQ2976/PRO7455/PRO7476 |  | ICOS    |  | PLG      |
| UNQ383/PRO715           |  | RUNX1   |  | CDH1     |
| UNQ387/PRO719           |  | KLF2    |  | MTRR     |
| UNQ411/PRO773           |  | PTHLH   |  | GCH1     |
| UNQ420/PRO856           |  | NTRK1   |  | PRDX1    |
| UNQ497/PRO1014          |  | NAAA    |  | HP       |
| UNQ5867/PRO34001        |  | GJC1    |  | DES      |
| UNQ611/PRO1198          |  | MAMLD1  |  | LMNA     |
| UNQ707/PRO1358          |  | MAP2K3  |  | CCL7     |
| UNQ784/PRO1600          |  | LTB     |  | TNFAIP6  |
| UNQ9384/PRO34209        |  | SEMA3A  |  | HRH2     |
| URB                     |  | ADIPOR1 |  | ATM      |
| VEGF                    |  | PCTP    |  | ABCB1    |

|          |  |          |  |          |
|----------|--|----------|--|----------|
| VEGF165R |  | TOLLIP   |  | ADAM15   |
| VEGFA    |  | AMELX    |  | COL15A1  |
| VEGFB    |  | SERPINB2 |  | F8       |
| VGR      |  | PYCARD   |  | PCNA     |
| VNRA     |  | IRAK1    |  | BMP2     |
| VRF      |  | HAVCR1   |  | USP20    |
| VTN      |  | MASP2    |  | SULT1E1  |
| VWF      |  | UCP2     |  | SASH1    |
| WAP4     |  | ECM1     |  | RPS6KB1  |
| WC1      |  | CRYAB    |  | ALOX5AP  |
| WFDC4    |  | TGFBR1   |  | NEU1     |
| WND      |  | GSK3A    |  | AOC2     |
| WNT1     |  | HPSE     |  | MDK      |
| XB       |  | SMPD2    |  | APOF     |
| XCL1     |  | AREG     |  | DNASE1   |
| XDH      |  | MRPS6    |  | MAP4K5   |
| XDHA     |  | SLC5A3   |  | TFAM     |
| XPCT     |  | IL12B    |  | CFTR     |
| ZIP4     |  | THBS2    |  | ANG      |
| ZNF146   |  | PRKN     |  | LPIN1    |
| ZNT1     |  | COL1A1   |  | CEL      |
| ZPI      |  | TBXAS1   |  | PPL      |
| ZTNF2    |  | SREBF2   |  | TLR3     |
|          |  | ANXA3    |  | BMPR2    |
|          |  | PZP      |  | IL1F10   |
|          |  | SRY      |  | ENPP1    |
|          |  | LCT      |  | PALLD    |
|          |  | ROCK1    |  | PCYT1A   |
|          |  | PDX1     |  | ITGA2B   |
|          |  | ANK2     |  | STAB1    |
|          |  | P2RY11   |  | GNB3     |
|          |  | GFAP     |  | ANGPT2   |
|          |  | HRC      |  | SLC25A22 |
|          |  | SNX17    |  | ST14     |
|          |  | MCF2L    |  | TGFB3    |
|          |  | IL22     |  | RNLS     |
|          |  | RHOJ     |  | CR1      |
|          |  | TYR      |  | SELENOS  |
|          |  | PROKR1   |  | FST      |
|          |  | S1PR2    |  | CD276    |
|          |  | IRAK4    |  | ADA      |
|          |  | CYP2R1   |  | RSAD2    |
|          |  | BMP1     |  | IFIH1    |
|          |  | TSC22D3  |  | TRAF5    |
|          |  | RASA1    |  | SPDEF    |
|          |  | SELPLG   |  | CXCL13   |
|          |  | NR1H4    |  | ITGB3    |

|  |          |           |
|--|----------|-----------|
|  | CXCR1    | KITLG     |
|  | TM6SF2   | CARD16    |
|  | SMAD4    | CERS5     |
|  | DST      | OGA       |
|  | CSRP3    | EPHX2     |
|  | GPR65    | SERPINA10 |
|  | LAMA3    | COL14A1   |
|  | KLF10    | LIAS      |
|  | IL4I1    | CLEC7A    |
|  | SLC25A4  | AGT       |
|  | ATG7     | LIF       |
|  | FLOT2    | SOD3      |
|  | GPX1     | TRPC1     |
|  | GJB1     | UCP2      |
|  | TES      | CCS       |
|  | APCS     | LTB       |
|  | NMI      | MSR1      |
|  | MAP4K5   | SFRP5     |
|  | KCNJ11   | CYBB      |
|  | CLEC6A   | G6PD      |
|  | NELFCD   | ETV3      |
|  | BMP7     | CXCL5     |
|  | GPKOW    | AIM2      |
|  | CD274    | FFAR4     |
|  | SKAP2    | CHST11    |
|  | PDLIM7   | TPP2      |
|  | SIRT2    | TMEM98    |
|  | S100P    | VEGFB     |
|  | SIRT5    | HPGDS     |
|  | CPNE3    | VTN       |
|  | TAPBP    | ADRB3     |
|  | UGCG     | MLKL      |
|  | APOL1    | GCK       |
|  | CDH1     | TTR       |
|  | RBP4     | LSR       |
|  | P2RY4    | MTX1      |
|  | PPIP5K1  | RBM45     |
|  | CHD1L    | DHCR7     |
|  | CALD1    | UTS2R     |
|  | PTGR1    | NEXN-AS1  |
|  | TRAF3IP2 | MMP17     |
|  | STAB1    | SERPINA9  |
|  | SCN4A    | NQO1      |
|  | DSE      | MYLIP     |
|  | TYRO3    | SMPD2     |
|  | DDIT3    | RNF213    |
|  | GNLY     | NLRP1     |

|  |  |          |  |          |
|--|--|----------|--|----------|
|  |  | TBPL1    |  | ITGB2    |
|  |  | TBX1     |  | TYMP     |
|  |  | SOX7     |  | GLA      |
|  |  | CYP7A1   |  | RORA     |
|  |  | RCAN1    |  | FHL2     |
|  |  | TNS3     |  | AKR1B1   |
|  |  | CD70     |  | FGF19    |
|  |  | DVL1     |  | SQSTM1   |
|  |  | SGSM3    |  | HACD4    |
|  |  | ITCH     |  | AMOT     |
|  |  | PTK2B    |  | ATF2     |
|  |  | HK1      |  | CNN2     |
|  |  | STK11    |  | LTBR     |
|  |  | CIC      |  | IL3      |
|  |  | DPYS     |  | JAK1     |
|  |  | TLX1NB   |  | PCSK5    |
|  |  | CCL18    |  | SETD2    |
|  |  | GPX3     |  | PIK3CD   |
|  |  | CPT1B    |  | PEBP1    |
|  |  | RGS7     |  | THBS2    |
|  |  | P2RY6    |  | PRMT3    |
|  |  | KRT74    |  | LGALS9   |
|  |  | SMPD1    |  | LMOD1    |
|  |  | CPT2     |  | IVD      |
|  |  | JPH2     |  | CR2      |
|  |  | LIMD1    |  | KDM4A    |
|  |  | NIBAN2   |  | CCL20    |
|  |  | SAA2     |  | A2M      |
|  |  | DPP6     |  | CCL27    |
|  |  | RHBDF2   |  | MAOA     |
|  |  | SLC25A16 |  | LPP      |
|  |  | CORO1A   |  | CYP11B2  |
|  |  | SIRT6    |  | LTF      |
|  |  | GIPR     |  | RIPK2    |
|  |  | FCN2     |  | CCR1     |
|  |  | DDAH2    |  | PVR      |
|  |  | AGPAT1   |  | TNFRSF1B |
|  |  | ARSI     |  | ANXA1    |
|  |  | LCK      |  | CHGA     |
|  |  | ITIH3    |  | ARNTL    |
|  |  | UCHL1    |  | PI3      |
|  |  | HMGA1    |  | SPN      |
|  |  | CDKN1C   |  | SEN2     |
|  |  | PKN1     |  | PRKG1    |
|  |  | ALMS1    |  | DHRS2    |
|  |  | UNC5B    |  | JUN      |
|  |  | PRORP    |  | MME      |



|  |  |          |  |         |
|--|--|----------|--|---------|
|  |  | HDAC9    |  | GP1BA   |
|  |  | NCF1     |  | C3      |
|  |  | SOD1     |  | GIP     |
|  |  | ACTA2    |  | INPP5K  |
|  |  | FCAR     |  | GRAP2   |
|  |  | TXNRD2   |  | GC      |
|  |  | TRAF6    |  | POU2F1  |
|  |  | RBPJ     |  | TSPO    |
|  |  | CXCL1    |  | CCR3    |
|  |  | LRP5     |  | AGXT    |
|  |  | CANX     |  | TAS1R3  |
|  |  | JAG1     |  | HTR2A   |
|  |  | RNH1     |  | ADAM9   |
|  |  | CYP3A5   |  | OSBPL8  |
|  |  | MAP9     |  | CEBPA   |
|  |  | ARID3A   |  | TTPA    |
|  |  | DNAJC5   |  | FDFT1   |
|  |  | EGF      |  | LPO     |
|  |  | CD93     |  | YBX1    |
|  |  | CORT     |  | LPXN    |
|  |  | ATP6AP2  |  | HSF1    |
|  |  | EMC10    |  | MNDA    |
|  |  | PCSK2    |  | RGS5    |
|  |  | IL17F    |  | PODXL   |
|  |  | HNRNPUL1 |  | ORMDL3  |
|  |  | SF3A2    |  | KLF5    |
|  |  | DOT1L    |  | MALT1   |
|  |  | CLEC16A  |  | CCL3    |
|  |  | SEMA3F   |  | PDE4D   |
|  |  | KAT8     |  | HDAC1   |
|  |  | PNOC     |  | THBS1   |
|  |  | ACTB     |  | TCFL5   |
|  |  | MVP      |  | CWC22   |
|  |  | SELENOP  |  | QKI     |
|  |  | DDRGK1   |  | CPB1    |
|  |  | PELI1    |  | PPP1R3B |
|  |  | NPY2R    |  | CREG1   |
|  |  | GREM2    |  | ABCD2   |
|  |  | CITED4   |  | EGF     |
|  |  | CEBPB    |  | CAST    |
|  |  | AR       |  | GDF2    |
|  |  | COL3A1   |  | RHBDF2  |
|  |  | PTGDR    |  | HDLBP   |
|  |  | DIS3L    |  | TBXA2R  |
|  |  | PRDX3    |  | PTGDS   |
|  |  | GYG1     |  | CEACAM5 |
|  |  | PDPK1    |  | APEX1   |

|  |            |         |
|--|------------|---------|
|  | MAP2K5     | SIRPA   |
|  | KMT2A      | HRAS    |
|  | NFE2L2     | PSMB8   |
|  | KRT18      | ADCY9   |
|  | LGALS3BP   | ABCA5   |
|  | OXT        | CARHSP1 |
|  | NRP1       | PTGES   |
|  | ST6GALNAC1 | MMP11   |
|  | SULT4A1    | ERCC8   |
|  | PAEP       | MYD88   |
|  | TSN        | IRF8    |
|  | ADCY10     | RTN3    |
|  | SMS        | MT2A    |
|  | PLK4       | CCN2    |
|  | FEV        | FASN    |
|  | FOXG1      | S1PR3   |
|  | CASP9      | INVS    |
|  | SMC3       | TCF21   |
|  | CFB        | HPX     |
|  | ITGA1      | HNF1A   |
|  | ACTG1      | PCOLCE2 |
|  | GPR132     | NPR2    |
|  | MYEOV      | SEMA7A  |
|  | MTNR1A     | FA2H    |
|  | KLK6       | NINJ2   |
|  | TKT        | CNP     |
|  | TTPA       | GATA2   |
|  | TPH1       | GCKR    |
|  | CFP        | TET1    |
|  | IL10RA     | ALOX15B |
|  | DKK1       | TXNL4B  |
|  | CUL7       | FOS     |
|  | CACNA2D2   | FABP2   |
|  | CAMKK1     | SLC16A8 |
|  | PARK7      | TRPC6   |
|  | FLT4       | SDC1    |
|  | S100A9     | CD209   |
|  | PTGIR      | ARG1    |
|  | BNIP3      | CTH     |
|  | EMP1       | PTPN11  |
|  | NANOS1     | NCOR1   |
|  | P2RY13     | TGM2    |
|  | MRS2       | CCL28   |
|  | SFRP4      | HTRA2   |
|  | STXBP2     | C1QTNF5 |
|  | ROS1       | IL34    |
|  | CCAR1      | MFN2    |

|  |          |          |
|--|----------|----------|
|  | NEDD4L   | BCL2A1   |
|  | APLNR    | ADAM12   |
|  | TPO      | CD274    |
|  | PTS      | MSTN     |
|  | EGLN3    | ANGPT1   |
|  | P4HB     | CYCS     |
|  | ATF7IP   | CTSB     |
|  | LPAL2    | STIM1    |
|  | TBC1D10C | NME1     |
|  | KRT1     | PTPN2    |
|  | SLC22A3  | SAMD1    |
|  | RPL17    | SLPI     |
|  | CFI      | MBTPS2   |
|  | SERHL    | SIRT3    |
|  | DSG3     | APOC2    |
|  | AKIP1    | NOX5     |
|  | FABP1    | CTSD     |
|  | TAS2R50  | NAP1L4   |
|  | RNASE1   | ACTG1    |
|  | SH3BP4   | NR1I3    |
|  | NFKBIA   | PYY      |
|  | TERT     | ID3      |
|  | HGS      | PLCB3    |
|  | S1PR1    | SRD5A1   |
|  | PLTP     | SRGN     |
|  | HNF1A    | FOXO3    |
|  | FZD1     | SMS      |
|  | NR4A2    | GALNT3   |
|  | HM13     | ILK      |
|  | SLC5A1   | PPP2R2A  |
|  | REG1A    | F12      |
|  | IFNB1    | MCF2L    |
|  | TBP      | EFNB1    |
|  | CBS      | LRG1     |
|  | JDP2     | GUCY1A1  |
|  | TLX2     | MUC16    |
|  | GAD1     | KISS1R   |
|  | GLA      | MB       |
|  | CDH5     | CLIC1    |
|  | F13A1    | CDKN1C   |
|  | MPG      | NR5A2    |
|  | COG2     | SRF      |
|  | PML      | ERCC1    |
|  | GPR35    | MAPK1    |
|  | NRF1     | MMP7     |
|  | GSDMD    | SERPINE2 |
|  | CD44     | CARD10   |

|  |  |         |  |          |
|--|--|---------|--|----------|
|  |  | NF2     |  | PHGDH    |
|  |  | CCK     |  | FBLN1    |
|  |  | CD19    |  | IRAK1    |
|  |  | AHSP    |  | RBPJ     |
|  |  | CLEC7A  |  | RP9      |
|  |  | SFTPB   |  | EPHA1    |
|  |  | G6PD    |  | CD63     |
|  |  | BDKRB1  |  | DOCK4    |
|  |  | VIP     |  | IGFBP2   |
|  |  | AMH     |  | TYROBP   |
|  |  | SPESP1  |  | NEFL     |
|  |  | FAM111B |  | NPPC     |
|  |  | ACOX1   |  | CCAR1    |
|  |  | AIFM1   |  | CFD      |
|  |  | DBT     |  | DDIT3    |
|  |  | SAT1    |  | CYGB     |
|  |  | PDC     |  | FADS1    |
|  |  | RASA4   |  | CHIT1    |
|  |  | CA1     |  | NECTIN1  |
|  |  | DCTN3   |  | RHOA     |
|  |  | MTRR    |  | RALBP1   |
|  |  | GAST    |  | SPRTN    |
|  |  | ERFE    |  | PDLIM7   |
|  |  | C1QTNF3 |  | ADM      |
|  |  | XRCC1   |  | CCL23    |
|  |  | CCL19   |  | POR      |
|  |  | AOC2    |  | SERPINA4 |
|  |  | OGG1    |  | TP53     |
|  |  | CREB3L1 |  | TNFSF10  |
|  |  | CARD8   |  | CTSG     |
|  |  | GDF11   |  | DDAH1    |
|  |  | CDH13   |  | PEMT     |
|  |  | LMNA    |  | NEIL3    |
|  |  | FNDC5   |  | CCDC80   |
|  |  | SORD    |  | IRF1     |
|  |  | IGF2R   |  | TNNI3    |
|  |  | MANF    |  | IL1RL1   |
|  |  | CFD     |  | ACKR1    |
|  |  | AGRN    |  | GDNF     |
|  |  | NPR3    |  | GHRL     |
|  |  | ACD     |  | CAMP     |
|  |  | MTX1    |  | RB1      |
|  |  | FCGR3A  |  | FBXO3    |
|  |  | TLR1    |  | IL21R    |
|  |  | FCGR3B  |  | STAT6    |
|  |  | FCGR1A  |  | IL7      |
|  |  | TCF7L2  |  | S100A6   |

|  |  |         |  |          |
|--|--|---------|--|----------|
|  |  | KLRG1   |  | ENPP2    |
|  |  | TRPC3   |  | CYLD     |
|  |  | FCGR2B  |  | FLCN     |
|  |  | PTPRU   |  | TWSG1    |
|  |  | SH2B3   |  | MT-CYB   |
|  |  | TRIT1   |  | MDM2     |
|  |  | IL5     |  | AAMP     |
|  |  | TCN1    |  | SPHK1    |
|  |  | ACADM   |  | FADS2    |
|  |  | ETV3    |  | NAAA     |
|  |  | TPI1    |  | NFATC1   |
|  |  | AGXT    |  | MIA3     |
|  |  | NAP1L4  |  | C1QTNF3  |
|  |  | CARD17  |  | NPR3     |
|  |  | DIPK2A  |  | PNLIP    |
|  |  | C1QTNF1 |  | IL21     |
|  |  | IGFBP7  |  | ENTPD1   |
|  |  | FADS1   |  | IL1R1    |
|  |  | EFNB2   |  | AVP      |
|  |  | ECD     |  | MICA     |
|  |  | LYVE1   |  | CSTB     |
|  |  | AVPR1A  |  | PLN      |
|  |  | VIM     |  | SYNPO2   |
|  |  | ECE1    |  | FABP1    |
|  |  | ENO2    |  | PROX1    |
|  |  | PSMA7   |  | SUMO1    |
|  |  | FAIM    |  | MRC1     |
|  |  | AGXT2   |  | THBS4    |
|  |  | SS18L1  |  | AOC1     |
|  |  | BDKRB2  |  | DEFA1    |
|  |  | IRF5    |  | SLCO6A1  |
|  |  | MAP6    |  | CALR     |
|  |  | ACPP    |  | SELENOP  |
|  |  | SLCO6A1 |  | FADD     |
|  |  | MT-ND2  |  | SERPING1 |
|  |  | HIGD1A  |  | IRAK3    |
|  |  | HSPB7   |  | RHD      |
|  |  | IHH     |  | FOSL1    |
|  |  | TRIM54  |  | SCARF1   |
|  |  | UBD     |  | IARS     |
|  |  | FGA     |  | SPRY1    |
|  |  | ASGR1   |  | RTN4     |
|  |  | HTR1B   |  | CARD8    |
|  |  | CASR    |  | SLC12A3  |
|  |  | CLSTN2  |  | VIP      |
|  |  | PTN     |  | DCD      |
|  |  | DMRTA1  |  | CRLF2    |

|  |  |          |  |          |
|--|--|----------|--|----------|
|  |  | VEGFD    |  | GAS6     |
|  |  | TBC1D4   |  | CLEC4C   |
|  |  | ARNTL    |  | ARRB2    |
|  |  | CA6      |  | INTS6    |
|  |  | CUEDC2   |  | NGF      |
|  |  | TNRC6B   |  | BCR      |
|  |  | FGFR1    |  | ABL1     |
|  |  | LRP6     |  | NCOA6    |
|  |  | C4BPA    |  | AQP7     |
|  |  | CD55     |  | ADGRE5   |
|  |  | ADCY3    |  | BCL3     |
|  |  | URI1     |  | NPR1     |
|  |  | MYL2     |  | SERPINB2 |
|  |  | CCN4     |  | APOBR    |
|  |  | TIGAR    |  | KALRN    |
|  |  | EPRS     |  | TLX2     |
|  |  | C4A      |  | DOCK7    |
|  |  | NKX2-5   |  | ZGPAT    |
|  |  | ANGPTL4  |  | ROR2     |
|  |  | MAT2B    |  | BDKRB2   |
|  |  | VEGFC    |  | TNFSF13  |
|  |  | PGAM5    |  | ASCL1    |
|  |  | CCL28    |  | CPE      |
|  |  | PLN      |  | SALL1    |
|  |  | CARD9    |  | FTL      |
|  |  | TNFRSF4  |  | MYLK     |
|  |  | PCSK7    |  | PDE3B    |
|  |  | PDIA6    |  | CD9      |
|  |  | SLC11A1  |  | FMOD     |
|  |  | RIPK2    |  | SLC2A1   |
|  |  | KRT3     |  | PARK7    |
|  |  | ALPK1    |  | PANX1    |
|  |  | GDF10    |  | TARDBP   |
|  |  | EDN3     |  | FCN2     |
|  |  | WLS      |  | ICOSLG   |
|  |  | JUP      |  | TRIP12   |
|  |  | PPARGC1B |  | ADHFE1   |
|  |  | HDGF     |  | UNK      |
|  |  | PALLD    |  | ADGRE2   |
|  |  | NDP      |  | DSTN     |
|  |  | PTPN22   |  | TMSB10   |
|  |  | SERPINA7 |  | CFH      |
|  |  | DUSP4    |  | TXNIP    |
|  |  | EMD      |  | PCBD1    |
|  |  | ABCC8    |  | SGMS1    |
|  |  | FGF16    |  | UCN3     |
|  |  | SREBF1   |  | PARP14   |

|  |  |          |  |            |
|--|--|----------|--|------------|
|  |  | BIN1     |  | LEF1       |
|  |  | NPY6R    |  | INO80D     |
|  |  | PPP1R10  |  | NNT        |
|  |  | OR13G1   |  | LILRB1     |
|  |  | IVL      |  | SAMHD1     |
|  |  | BTG2     |  | HS3ST1     |
|  |  | TMEM123  |  | ADTRP      |
|  |  | PHLDA1   |  | RAG2       |
|  |  | DNMT3A   |  | IL1RN      |
|  |  | MEFV     |  | EIF2S1     |
|  |  | GATA3    |  | NUCB2      |
|  |  | MAG      |  | DDR2       |
|  |  | ALG1     |  | WRN        |
|  |  | CASP12   |  | APH1B      |
|  |  | MT-CYB   |  | MERTK      |
|  |  | IFIT1    |  | MTRNR2L8   |
|  |  | SSTR2    |  | CIDEC      |
|  |  | JMJD1C   |  | NBL1       |
|  |  | FGG      |  | SLC5A10    |
|  |  | DDR2     |  | ABCA12     |
|  |  | OGT      |  | MASP1      |
|  |  | CTSL     |  | MASP2      |
|  |  | PRDM2    |  | HSPB3      |
|  |  | CRX      |  | NNMT       |
|  |  | TRIB3    |  | IRAK4      |
|  |  | ELOVL5   |  | SH3BP4     |
|  |  | PGLYRP1  |  | RBPM5      |
|  |  | SERPINA3 |  | PLXNB2     |
|  |  | STH      |  | CPSF4      |
|  |  | SMAD1    |  | SOX6       |
|  |  | EGR1     |  | VAMP3      |
|  |  | PRSS27   |  | CUL3       |
|  |  | DRAM1    |  | IL1R2      |
|  |  | LPXN     |  | CTNNB1     |
|  |  | CTSG     |  | GRK2       |
|  |  | PLD1     |  | CLEC6A     |
|  |  | GRK5     |  | FCGR3A     |
|  |  | COL1A2   |  | SYNM       |
|  |  | PLA2R1   |  | CCR9       |
|  |  | TLN1     |  | CSGALNACT2 |
|  |  | DAO      |  | DFFB       |
|  |  | GYS1     |  | TPM4       |
|  |  | PIAS1    |  | AIRE       |
|  |  | PER2     |  | ADIPOR1    |
|  |  | SERPINB6 |  | CIART      |
|  |  | SFRP1    |  | ITGAD      |
|  |  | P2RY1    |  | SORD       |

|  |  |          |  |          |
|--|--|----------|--|----------|
|  |  | NCAM1    |  | DSC1     |
|  |  | LDHB     |  | ZFP36    |
|  |  | APOC2    |  | IDE      |
|  |  | LDHA     |  | SCP2     |
|  |  | SH3BP5   |  | DSE      |
|  |  | APOBEC3G |  | P3H3     |
|  |  | IRF9     |  | PITRM1   |
|  |  | IGHM     |  | METRN    |
|  |  | MT-CO1   |  | AHCY     |
|  |  | C5AR1    |  | SH2D3C   |
|  |  | ZGPAT    |  | ACHE     |
|  |  | KRT77    |  | CHI3L2   |
|  |  | DPPA3    |  | RUNX3    |
|  |  | PMCH     |  | ADIPOR2  |
|  |  | RBM10    |  | CPN1     |
|  |  | IFNL1    |  | TLR1     |
|  |  | SYNM     |  | NR1D2    |
|  |  | NR1D2    |  | ACVRL1   |
|  |  | GLRX     |  | DDAH2    |
|  |  | NPTX1    |  | UCP1     |
|  |  | ALK      |  | CASR     |
|  |  | MRAP     |  | MUC5AC   |
|  |  | AQP3     |  | GP5      |
|  |  | ATP7A    |  | PATE1    |
|  |  | CDS1     |  | GSTA4    |
|  |  | SQSTM1   |  | SERPINA6 |
|  |  | DFFA     |  | PMPCA    |
|  |  | GJD2     |  | RETNLB   |
|  |  | UBE2Z    |  | NIFK     |
|  |  | DDX4     |  | ARHGAP18 |
|  |  | CGN      |  | ADCYAP1  |
|  |  | ESD      |  | NEUROD4  |
|  |  | ETV6     |  | ZMYM2    |
|  |  | OPN1SW   |  | LYPLA1   |
|  |  | AVPR2    |  | WIPF1    |
|  |  | MYOG     |  | VIPR1    |
|  |  | IVNS1ABP |  | SELENOK  |
|  |  | GHRHR    |  | NBN      |
|  |  | COPE     |  | EPN1     |
|  |  | NBN      |  | IDS      |
|  |  | CBY1     |  | NR0B1    |
|  |  | CPA1     |  | CD74     |
|  |  | CD5L     |  | PDE1C    |
|  |  | MXD1     |  | SFRP4    |
|  |  | TKTL1    |  | YME1L1   |
|  |  | ERBB2    |  | TGFBR2   |
|  |  | PRKCB    |  | GAD1     |



|  |  |          |  |         |
|--|--|----------|--|---------|
|  |  | ITPRID2  |  | MVD     |
|  |  | CCND2    |  | ABCG4   |
|  |  | FBN1     |  | NELFCD  |
|  |  | IL1RL1   |  | COL4A1  |
|  |  | CCL7     |  | C5AR2   |
|  |  | GLRA2    |  | ALOX12  |
|  |  | GCFC2    |  | HLA-DMB |
|  |  | CYP1A1   |  | EIF2AK1 |
|  |  | NF1      |  | QPCTL   |
|  |  | BNIP3L   |  | MLXIPL  |
|  |  | CD38     |  | PROCR   |
|  |  | SLURP1   |  | CA1     |
|  |  | BNC1     |  | NR6A1   |
|  |  | GPNMB    |  | PRKCA   |
|  |  | EPHX2    |  | LYVE1   |
|  |  | DGUOK    |  | COLEC12 |
|  |  | PSD      |  | HDAC6   |
|  |  | NPR2     |  | LUM     |
|  |  | MFGE8    |  | BIRC2   |
|  |  | INPP5K   |  | CLCN3   |
|  |  | MAPK8    |  | ANK1    |
|  |  | ABCC6    |  | NANOS1  |
|  |  | CHGB     |  | PCTP    |
|  |  | LTF      |  | CASP9   |
|  |  | DBI      |  | MIA     |
|  |  | BAX      |  | DLAT    |
|  |  | TNFRSF1B |  | RARA    |
|  |  | TRIM72   |  | ACPI    |
|  |  | CAVIN4   |  | UGCG    |
|  |  | ITGA5    |  | PSME3   |
|  |  | SMC2     |  | PDGFRA  |
|  |  | SFTPD    |  | CENPJ   |
|  |  | VNN3     |  | MATN1   |
|  |  | AKR1B1   |  | CCN4    |
|  |  | TXNDC9   |  | RNASE3  |
|  |  | BMP4     |  | EGR1    |
|  |  | RIPK1    |  | DMD     |
|  |  | TMEFF1   |  | SAA2    |
|  |  | HBEGF    |  | PDGFD   |
|  |  | FDFT1    |  | SGK1    |
|  |  | PTPN11   |  | CYP1A2  |
|  |  | CRIP1    |  | LRIT1   |
|  |  | ZBTB12   |  | PIAS1   |
|  |  | NOS1AP   |  | C5orf38 |
|  |  | TRH      |  | SMAD1   |
|  |  | SLN      |  | TBP     |
|  |  | ANK3     |  | CARD9   |

|  |  |          |  |          |
|--|--|----------|--|----------|
|  |  | DLAT     |  | CDK5     |
|  |  | DOCK11   |  | JAG1     |
|  |  | MDM2     |  | HYOU1    |
|  |  | GDF1     |  | RTCA     |
|  |  | EDN2     |  | MAPK6    |
|  |  | MYRF     |  | PITX2    |
|  |  | CACYBP   |  | SMTN     |
|  |  | PDGFRB   |  | SPRR3    |
|  |  | IKBKB    |  | ABR      |
|  |  | RASL12   |  | REG1A    |
|  |  | SENP1    |  | TNFRSF6B |
|  |  | RCN1     |  | SOX18    |
|  |  | GOPC     |  | BTC      |
|  |  | GRN      |  | CCAR2    |
|  |  | E2F2     |  | EGLN3    |
|  |  | PTCRA    |  | GATA1    |
|  |  | MLKL     |  | GTPBP1   |
|  |  | RRM1     |  | GDF10    |
|  |  | ARIH1    |  | NR4A3    |
|  |  | AGL      |  | PDC      |
|  |  | PIGF     |  | MTAP     |
|  |  | HYOU1    |  | ANXA2    |
|  |  | TNFSF10  |  | TYRO3    |
|  |  | CD80     |  | CBFA2T2  |
|  |  | UTP25    |  | SEPHS1   |
|  |  | SKP1     |  | TP53INP2 |
|  |  | ST8SIA4  |  | HOXA11   |
|  |  | SLC29A1  |  | MMD      |
|  |  | TNFSF13B |  | HPS1     |
|  |  | SEC14L2  |  | NF1      |
|  |  | BLVRB    |  | CCL8     |
|  |  | TNS1     |  | KCNE2    |
|  |  | UBE2K    |  | MT-RNR2  |
|  |  | ICAM3    |  | CKLF     |
|  |  | EVC      |  | HHIPL1   |
|  |  | LMCD1    |  | SRR      |
|  |  | BCLAF1   |  | BTG3     |
|  |  | DPEP1    |  | STRIP2   |
|  |  | CFLAR    |  | LAG3     |
|  |  | IFNGR2   |  | CDC42    |
|  |  | OPN1MW   |  | ACADS    |
|  |  | ERAS     |  | CD5L     |
|  |  | GAS6     |  | KLF10    |
|  |  | MMP10    |  | TGFBI    |
|  |  | NGB      |  | CEBPZ    |
|  |  | CRH      |  | TRPC5    |
|  |  | SLC5A6   |  | IFI44    |

|  |  |         |  |          |
|--|--|---------|--|----------|
|  |  | ADAM10  |  | NR2C2    |
|  |  | DTNA    |  | JCAD     |
|  |  | RET     |  | INPPL1   |
|  |  | TFG     |  | STC1     |
|  |  | CNPY2   |  | TNFRSF14 |
|  |  | NEU1    |  | FDX1     |
|  |  | GRK6    |  | BLVRB    |
|  |  | EPHB4   |  | PTPRU    |
|  |  | CNTN2   |  | RAPGEF3  |
|  |  | PENK    |  | PPBP     |
|  |  | THAP5   |  | MUC1     |
|  |  | CA5B    |  | PLA2G2A  |
|  |  | MRRF    |  | PEG10    |
|  |  | ARNT    |  | IGFBP7   |
|  |  | CAPN10  |  | PRSS27   |
|  |  | MMP20   |  | NFKBIA   |
|  |  | MYBL2   |  | PAGR1    |
|  |  | SLC4A4  |  | MT-CO1   |
|  |  | DGKA    |  | DDX41    |
|  |  | PGRMC1  |  | CAV3     |
|  |  | MLXIPL  |  | AKTIP    |
|  |  | CYP17A1 |  | NGB      |
|  |  | FGFR2   |  | ATP7A    |
|  |  | RNF182  |  | EBF1     |
|  |  | ADCY5   |  | KLF15    |
|  |  | TNXB    |  | PRMT2    |
|  |  | FADD    |  | OGT      |
|  |  | CXCR5   |  | DBT      |
|  |  | DKK2    |  | PTK2B    |
|  |  | RGS5    |  | SRM      |
|  |  | TBCD    |  | HAL      |
|  |  | NPFF    |  | MEF2C    |
|  |  | ACVRL1  |  | SLC25A3  |
|  |  | GSC     |  | ESM1     |
|  |  | RAF1    |  | TXNRD2   |
|  |  | DNMT1   |  | MAP2K1   |
|  |  | PLD2    |  | ACP5     |
|  |  | PODXL   |  | SLC2A10  |
|  |  | EZH1    |  | CD151    |
|  |  | NOD1    |  | SERPINB9 |
|  |  | SHD     |  | RGS3     |
|  |  | TLE5    |  | TOR1A    |
|  |  | OAZ1    |  | PTN      |
|  |  | HAS3    |  | PDCD5    |
|  |  | TAB1    |  | CXCL9    |
|  |  | HDAC6   |  | MYH11    |
|  |  | DGCR2   |  | MPI      |

|  |  |          |  |          |
|--|--|----------|--|----------|
|  |  | TBC1D1   |  | ZC3HC1   |
|  |  | VCL      |  | OMP      |
|  |  | CGAS     |  | ACLY     |
|  |  | EXOSC4   |  | GDF11    |
|  |  | MUC5AC   |  | COL4A2   |
|  |  | LRRK2    |  | INHBA    |
|  |  | PRKG1    |  | SERPINA3 |
|  |  | FZD2     |  | SERHL    |
|  |  | HTR1D    |  | GREM1    |
|  |  | GBA      |  | FBLN2    |
|  |  | CCR9     |  | TIMP4    |
|  |  | MFF      |  | SLC39A8  |
|  |  | NDUFS4   |  | NOC2L    |
|  |  | PTH1R    |  | VCL      |
|  |  | ADK      |  | PLA2G3   |
|  |  | OBSCN    |  | NFIA     |
|  |  | RPIA     |  | FGB      |
|  |  | MERTK    |  | DCTN3    |
|  |  | GPR180   |  | CXCL11   |
|  |  | AMIGO2   |  | FOXO1    |
|  |  | SLCO1C1  |  | E2F1     |
|  |  | SKIL     |  | DPP9     |
|  |  | PAPOLG   |  | ARRB1    |
|  |  | CTSC     |  | SLC2A4RG |
|  |  | STAG2    |  | HDAC5    |
|  |  | PITX1    |  | DNM1     |
|  |  | MATK     |  | AURKA    |
|  |  | AGGF1    |  | SLAMF7   |
|  |  | SLC2A4RG |  | AGER     |
|  |  | EGLN2    |  | MRPS6    |
|  |  | MIA      |  | ADCY8    |
|  |  | APELA    |  | IFNAR1   |
|  |  | ASIC3    |  | RPA2     |
|  |  | ONECUT3  |  | FGFR1    |
|  |  | NMS      |  | CEBPD    |
|  |  | OPA1     |  | AMD1     |
|  |  | EXOSC10  |  | CSHL1    |
|  |  | LIMS1    |  | FAM168B  |
|  |  | EVPL     |  | CCL18    |
|  |  | ZNF202   |  | IGFBP4   |
|  |  | MCU      |  | SFTPB    |
|  |  | SMPD4    |  | PLXNB1   |
|  |  | ADAMTS8  |  | PAK1     |
|  |  | MASP1    |  | EDN3     |
|  |  | GRK4     |  | BAX      |
|  |  | INHBA    |  | CEACAM6  |
|  |  | RIPOR2   |  | C1QTNF1  |

|  |  |          |  |          |
|--|--|----------|--|----------|
|  |  | MAP2K6   |  | ADCY10   |
|  |  | EZH2     |  | UBE2K    |
|  |  | AKT2     |  | PLA2G10  |
|  |  | NDRG1    |  | CELSR2   |
|  |  | SLC25A1  |  | NANOS3   |
|  |  | LRP2     |  | FBN1     |
|  |  | LIMS2    |  | DPEP1    |
|  |  | ITIH4    |  | KIF6     |
|  |  | LAP3     |  | C4BPA    |
|  |  | ATP10D   |  | IL6R     |
|  |  | SRC      |  | TRPM6    |
|  |  | S1PR3    |  | MT1F     |
|  |  | CHUK     |  | NXPH4    |
|  |  | KRT10    |  | STAP2    |
|  |  | CHRM2    |  | DEFB103B |
|  |  | TBCA     |  | EFNA1    |
|  |  | TACR3    |  | PDPN     |
|  |  | TEF      |  | NR4A2    |
|  |  | HK2      |  | GPR84    |
|  |  | SPAG8    |  | NECTIN2  |
|  |  | ATP8A2   |  | RNASE1   |
|  |  | AKAP12   |  | CHKA     |
|  |  | SHC2     |  | SKAP2    |
|  |  | TST      |  | TBCA     |
|  |  | TRAP1    |  | RPE      |
|  |  | SFTPA1   |  | PLD2     |
|  |  | ONECUT2  |  | YY1      |
|  |  | TCF21    |  | MC4R     |
|  |  | MLYCD    |  | ANXA13   |
|  |  | CD209    |  | AXL      |
|  |  | GCKR     |  | C1QTNF12 |
|  |  | AFM      |  | KCNN3    |
|  |  | P4HA2    |  | TNFAIP3  |
|  |  | SCT      |  | ARSI     |
|  |  | IFNGR1   |  | FGG      |
|  |  | TRPM2    |  | PPM1D    |
|  |  | CD86     |  | VPS51    |
|  |  | LTC4S    |  | TMF1     |
|  |  | C6orf15  |  | APAF1    |
|  |  | KRTAP1-1 |  | EPAS1    |
|  |  | PSMG1    |  | HECA     |
|  |  | DDX41    |  | GNA11    |
|  |  | HCAR2    |  | ATP2B1   |
|  |  | TALDO1   |  | SCT      |
|  |  | TPPP     |  | FYN      |
|  |  | INPP5D   |  | SST      |
|  |  | CKB      |  | NTRK1    |

|  |  |         |  |           |
|--|--|---------|--|-----------|
|  |  | CLMN    |  | IL25      |
|  |  | CTLA4   |  | HAS2      |
|  |  | S100A11 |  | IGFBP5    |
|  |  | CXADR   |  | TRIM63    |
|  |  | PTGES   |  | PLA1A     |
|  |  | PDGFC   |  | ATF4      |
|  |  | MEN1    |  | RPIA      |
|  |  | FLNC    |  | UCN2      |
|  |  | LRRFIP1 |  | CDKN2A-DT |
|  |  | SRGN    |  | OCLN      |
|  |  | LAX1    |  | GYPE      |
|  |  | SLC2A1  |  | PTMA      |
|  |  | TPSG1   |  | KRT14     |
|  |  | EPHA4   |  | FGA       |
|  |  | FHL2    |  | ITGAM     |
|  |  | CDKN1B  |  | UCN       |
|  |  | IL7     |  | APPL1     |
|  |  | LIPE    |  | CNNM2     |
|  |  | NOTCH3  |  | CYP17A1   |
|  |  | CD6     |  | GNA12     |
|  |  | CLK1    |  | WDR12     |
|  |  | KDM5D   |  | APCS      |
|  |  | PAX6    |  | CAAP1     |
|  |  | NR2E3   |  | RGS4      |
|  |  | CCL27   |  | RASD1     |
|  |  | ATP10A  |  | ABCC1     |
|  |  | TRIM39  |  | MADCAM1   |
|  |  | MUC1    |  | CYP26A1   |
|  |  | CCR3    |  | ITGA6     |
|  |  | TSPAN10 |  | NT5C2     |
|  |  | MYOZ2   |  | SMG6      |
|  |  | FOS     |  | LY75      |
|  |  | RNASE2  |  | FLOT2     |
|  |  | BMPER   |  | ABCC6     |
|  |  | FOXH1   |  | DFFA      |
|  |  | MRAS    |  | CALU      |
|  |  | COMMD7  |  | MCAT      |
|  |  | TMEFF2  |  | CSF1R     |
|  |  | XCL1    |  | PDGFC     |
|  |  | VHL     |  | MYC       |
|  |  | NR4A1   |  | MTFMT     |
|  |  | NPPB    |  | CABIN1    |
|  |  | ODC1    |  | COMP      |
|  |  | POMC    |  | COL1A2    |
|  |  | HPX     |  | CNMD      |
|  |  | ALOX12  |  | MEF2A     |
|  |  | CKM     |  | GRN       |

|  |  |            |  |          |
|--|--|------------|--|----------|
|  |  | NINL       |  | TFRC     |
|  |  | ABL1       |  | PLA2G5   |
|  |  | MLN        |  | GLG1     |
|  |  | FCN1       |  | ADI1     |
|  |  | LXN        |  | APOBEC3G |
|  |  | HMMR       |  | PLAC1    |
|  |  | PAF1       |  | PTPRN2   |
|  |  | SPON1      |  | MPZL2    |
|  |  | CNTF       |  | PCSK6    |
|  |  | KIR3DL3    |  | HDC      |
|  |  | ORM2       |  | FBLN5    |
|  |  | MYBPHL     |  | G0S2     |
|  |  | LAT        |  | MMP19    |
|  |  | MT-RNR2    |  | MPL      |
|  |  | RACK1      |  | BIRC6    |
|  |  | NCR3       |  | SPIN1    |
|  |  | HSPA1A     |  | RPGRIP1L |
|  |  | HLA-DMA    |  | DNAJC5   |
|  |  | CES1       |  | CPA1     |
|  |  | GFPT1      |  | PSEN1    |
|  |  | POU3F4     |  | PLXND1   |
|  |  | IARS       |  | IL18BP   |
|  |  | H2AFX      |  | NT5C1A   |
|  |  | NANOS3     |  | ADAMTS18 |
|  |  | 1-Mar      |  | STAB2    |
|  |  | NRG3       |  | NDC80    |
|  |  | PRMT3      |  | RNF2     |
|  |  | ANXA2      |  | GCLC     |
|  |  | LRRC3B     |  | PSMG1    |
|  |  | AURKB      |  | GIPR     |
|  |  | OPLAH      |  | ALX1     |
|  |  | FLII       |  | PODN     |
|  |  | NECTIN3    |  | ITGA2    |
|  |  | RAG2       |  | LRP8     |
|  |  | ADCY6      |  | TMEM18   |
|  |  | CD7        |  | TCHP     |
|  |  | CALB2      |  | NUP43    |
|  |  | BCL2       |  | F7       |
|  |  | SGCD       |  | FLT4     |
|  |  | NRG4       |  | APEH     |
|  |  | AC010330.1 |  | SLC11A2  |
|  |  | BMI1       |  | TPO      |
|  |  | SPINT2     |  | MLN      |
|  |  | CRK        |  | CDK2     |
|  |  | MARS       |  | BTNL2    |
|  |  | CHRFAM7A   |  | STH      |
|  |  | AGBL2      |  | BACE1    |

|  |  |          |  |         |
|--|--|----------|--|---------|
|  |  | TP53INP1 |  | FEV     |
|  |  | CDCA7L   |  | HMGA1   |
|  |  | TBXT     |  | MFAP4   |
|  |  | CAMP     |  | BMPER   |
|  |  | CXCL3    |  | RSU1    |
|  |  | SLAMF6   |  | PLCB2   |
|  |  | CPSF4    |  | PRCP    |
|  |  | PDXK     |  | EGLN1   |
|  |  | PIP      |  | UFM1    |
|  |  | FGF18    |  | GNRHR   |
|  |  | ART3     |  | ACOT7   |
|  |  | CD96     |  | CXCL2   |
|  |  | MCHR2    |  | HSPB1   |
|  |  | FOXO1    |  | NPS     |
|  |  | TAOK2    |  | S100A10 |
|  |  | PAK1     |  | ABCD1   |
|  |  | ZNF185   |  | GPC1    |
|  |  | MMUT     |  | GCLM    |
|  |  | FARS2    |  | CD24    |
|  |  | BTF3     |  | SLC2A4  |
|  |  | LHFPL2   |  | CLCF1   |
|  |  | POU2F1   |  | ATG13   |
|  |  | PGD      |  | PSTPIP2 |
|  |  | IRF8     |  | CHAC1   |
|  |  | PCSK6    |  | PDE1A   |
|  |  | TCHP     |  | IL11    |
|  |  | HNRNPD   |  | RAF1    |
|  |  | STAT4    |  | TNNT1   |
|  |  | DTNB     |  | FPR1    |
|  |  | ANGPTL2  |  | IL24    |
|  |  | MDFIC    |  | ACD     |
|  |  | KLRC1    |  | ACTB    |
|  |  | KLRD1    |  | ACOX1   |
|  |  | ECHDC3   |  | CTSA    |
|  |  | RSAD2    |  | IL17RB  |
|  |  | ROCK2    |  | CCL26   |
|  |  | ADAMDEC1 |  | GJC2    |
|  |  | CKMT2    |  | NANOS2  |
|  |  | AOC3     |  | RAG1    |
|  |  | GFPT2    |  | HNRNPK  |
|  |  | KIF3A    |  | BRINP3  |
|  |  | RGN      |  | SCUBE1  |
|  |  | TIMM8A   |  | AIFM1   |
|  |  | OPRL1    |  | GSN     |
|  |  | PEX6     |  | HMBOX1  |
|  |  | EPX      |  | GPR119  |
|  |  | EPCAM    |  | SRSF1   |



|  |  |           |  |         |
|--|--|-----------|--|---------|
|  |  | PPL       |  | CSN2    |
|  |  | CASC1     |  | PRMT1   |
|  |  | TACR1     |  | MTR     |
|  |  | MAPKAPK3  |  | QSOX1   |
|  |  | C9        |  | FGF12   |
|  |  | LIFR      |  | KAT8    |
|  |  | RASGRF2   |  | PNN     |
|  |  | ARSB      |  | ITIH4   |
|  |  | IK        |  | CDH8    |
|  |  | MED23     |  | ARSB    |
|  |  | FBXL4     |  | CASP8   |
|  |  | ASF1A     |  | OSCAR   |
|  |  | KLRB1     |  | IDH2    |
|  |  | CD5       |  | CIITA   |
|  |  | DNTT      |  | PACS2   |
|  |  | RAPGEF1   |  | RRS1    |
|  |  | MYL7      |  | MTSS1   |
|  |  | CALB1     |  | GLB1    |
|  |  | ZDHHC2    |  | PLA2G2F |
|  |  | WFDC1     |  | MSN     |
|  |  | PARD6A    |  | MMUT    |
|  |  | CELF4     |  | KLK3    |
|  |  | IL2RB     |  | CBLIF   |
|  |  | FKBP5     |  | SESN2   |
|  |  | TBC1D2    |  | PRDX5   |
|  |  | ITGA6     |  | OPRL1   |
|  |  | AFP       |  | GADD45A |
|  |  | YBX1      |  | TBX18   |
|  |  | SLAMF7    |  | GHRHR   |
|  |  | NISCH     |  | PYCARD  |
|  |  | TENM1     |  | TLR8    |
|  |  | IL27      |  | SPTLC1  |
|  |  | EPHA2     |  | ITGA8   |
|  |  | TPM1      |  | PRKCH   |
|  |  | ANXA7     |  | IKBKE   |
|  |  | GLUL      |  | INSIG2  |
|  |  | ZMYM2     |  | MT-RNR1 |
|  |  | PRMT5     |  | HDAC2   |
|  |  | REM1      |  | TNFSF15 |
|  |  | CEACAM1   |  | PRNP    |
|  |  | ERBB3     |  | EGLN2   |
|  |  | MAP4      |  | VDAC1   |
|  |  | AQP2      |  | TNFRSF4 |
|  |  | CBFA2T2   |  | LRP1B   |
|  |  | PIPOX     |  | HPS3    |
|  |  | TNFRSF13C |  | TGM7    |
|  |  | RAPGEF3   |  | HPD     |

|  |  |         |  |          |
|--|--|---------|--|----------|
|  |  | PHLPP2  |  | PLK4     |
|  |  | ACSL1   |  | DENR     |
|  |  | ACKR2   |  | FGFBP1   |
|  |  | SLC6A3  |  | RNF112   |
|  |  | BBS9    |  | VASP     |
|  |  | HSPA8   |  | SLC25A19 |
|  |  | KRT25   |  | EFNB2    |
|  |  | CD47    |  | ECD      |
|  |  | RHCE    |  | NID1     |
|  |  | DAOA    |  | ZAP70    |
|  |  | KRT28   |  | TRIM14   |
|  |  | HARS    |  | PLIN3    |
|  |  | KRT86   |  | BAMBI    |
|  |  | AMN     |  | ATG16L1  |
|  |  | PPRC1   |  | YBX3     |
|  |  | AMT     |  | ACPP     |
|  |  | HEMGN   |  | BRAP     |
|  |  | KRT85   |  | DISC1    |
|  |  | ALDH1A2 |  | IFNGR2   |
|  |  | E2F3    |  | NEDD9    |
|  |  | CBX1    |  | DUSP10   |
|  |  | BMF     |  | SCG3     |
|  |  | EEF1A2  |  | CALD1    |
|  |  | TBX21   |  | CEP152   |
|  |  | IL2RA   |  | FXYD1    |
|  |  | PIR     |  | SULF2    |
|  |  | MALT1   |  | PGP      |
|  |  | FRZB    |  | ESRRA    |
|  |  | HMCN1   |  | SCARA5   |
|  |  | TFAP2A  |  | C1QTNF6  |
|  |  | ABCA7   |  | GPS2     |
|  |  | MYBPC3  |  | SIGLEC9  |
|  |  | DDC     |  | HMGXB3   |
|  |  | OXCT1   |  | GAPDH    |
|  |  | IFNLR1  |  | ZMPSTE24 |
|  |  | COL18A1 |  | LMCD1    |
|  |  | GNDF    |  | KMT2E    |
|  |  | TGFBI   |  | SCAF1    |
|  |  | XBP1    |  | WNT5A    |
|  |  | PBRM1   |  | CCL25    |
|  |  | RYR3    |  | CD2      |
|  |  | MYD88   |  | SPON1    |
|  |  | CRY2    |  | C4A      |
|  |  | MBNL1   |  | SFTA3    |
|  |  | DIAPH1  |  | MT1DP    |
|  |  | TRPM4   |  | LSAMP    |
|  |  | DLG1    |  | DEFB4B   |

|  |         |         |
|--|---------|---------|
|  | NLRP2   | SMPDL3A |
|  | RAD51D  | KISS1   |
|  | CALR    | KRT8    |
|  | PRKAR2A | ALCAM   |
|  | FBLN1   | HSP90B1 |
|  | BCR     | NDRG2   |
|  | PRNP    | AGGF1   |
|  | HCRT    | PBRM1   |
|  | EIF2S1  | NRG1    |
|  | RAD50   | SAA4    |
|  | CPM     | KCNMB1  |
|  | POFUT1  | SETD7   |
|  | DNM1L   | VAV1    |
|  | NRGN    | PPM1B   |
|  | FMN1    | CLIP1   |
|  | SLC12A8 | TNFSF14 |
|  | KRT14   | TRERF1  |
|  | HSP90B1 | IL17C   |
|  | FANCC   | DHCR24  |
|  | CACNA1B | DBN1    |
|  | NBEAL1  | SMOC2   |
|  | EMILIN1 | HSPA8   |
|  | DSP     | GOSR2   |
|  | MYH7    | CUBN    |
|  | KCNH2   | NDRG1   |
|  | DSG2    | HAS3    |
|  | TNFRSF9 | HM13    |
|  | ZFP90   | TRPM7   |
|  | ASAH2   | CAPN6   |
|  | GNRH1   | NSF     |
|  | MANSC1  | RASGRP2 |
|  | WTAP    | TRO     |
|  | CEBPZ   | EIF2AK2 |
|  | CRHR2   | STAT2   |
|  | PNPLA3  | AMH     |
|  | CALCR   | PDGFB   |
|  | DNAH11  | CD19    |
|  | SRA1    | APOBEC1 |
|  | CFL1    | CD5     |
|  | EEF2    | UGT1A1  |
|  | MC4R    | HYLS1   |
|  | PITX2   | LSM1    |
|  | CDCP1   | CTSF    |
|  | DISC1   | PNOC    |
|  | ASRGL1  | LAIR1   |
|  | PLK2    | OR2D2   |
|  | ZFHX3   | CLEC3B  |

|  |  |           |  |          |
|--|--|-----------|--|----------|
|  |  | PIK3C2G   |  | HCRT     |
|  |  | NAB1      |  | S100A1   |
|  |  | CDC73     |  | EIF4E    |
|  |  | TPT1      |  | TMX1     |
|  |  | RAN       |  | SLCO2B1  |
|  |  | SCAF1     |  | LDHA     |
|  |  | NFKBIB    |  | ITGB4    |
|  |  | ANAPC5    |  | AVPR2    |
|  |  | RGS1      |  | STK25    |
|  |  | TMEM38B   |  | CCT4     |
|  |  | AKAP1     |  | EHHADH   |
|  |  | GSR       |  | AGXT2    |
|  |  | PTPRD     |  | DUSP16   |
|  |  | CA4       |  | FOLR1    |
|  |  | ACSL6     |  | HPN      |
|  |  | DAB2IP    |  | OIP5     |
|  |  | CEPT1     |  | CELSR1   |
|  |  | IVD       |  | DPP8     |
|  |  | GRIN2B    |  | NOTCH3   |
|  |  | AXDND1    |  | IKBKG    |
|  |  | HNF1B     |  | FCGR1A   |
|  |  | PDGFD     |  | OPN1SW   |
|  |  | ADGB      |  | NFKB1    |
|  |  | SHF       |  | CCR4     |
|  |  | SKAP1     |  | OSBP     |
|  |  | WNT4      |  | CDC27    |
|  |  | DGKQ      |  | HPR      |
|  |  | SP7       |  | MYH9     |
|  |  | SPN       |  | GPIHBP1  |
|  |  | PRTN3     |  | CCL16    |
|  |  | NEB       |  | KLRC2    |
|  |  | TNFRSF10C |  | TRPV2    |
|  |  | MTSS1     |  | CCL13    |
|  |  | BRAF      |  | TMEM11   |
|  |  | NOTCH1    |  | COMMD1   |
|  |  | FBLN5     |  | NPTX1    |
|  |  | TRPC6     |  | CUL5     |
|  |  | MYH10     |  | MRAS     |
|  |  | QPCT      |  | PPARGC1B |
|  |  | PNN       |  | NUS1     |
|  |  | MCAT      |  | NCAM1    |
|  |  | KCNE4     |  | TERF1    |
|  |  | DAP       |  | SCML4    |
|  |  | SDK1      |  | OSGIN1   |
|  |  | CCDC60    |  | MED28    |
|  |  | TFEB      |  | RGS2     |
|  |  | BOK       |  | CAMKK2   |

|  |          |           |
|--|----------|-----------|
|  | CACNB3   | LRP2BP    |
|  | ILKAP    | TGFBR1    |
|  | COL5A1   | BMF       |
|  | FOXE1    | MLYCD     |
|  | MEX3B    | CTCF      |
|  | PBX2P1   | RTRAF     |
|  | SLCO3A1  | LXN       |
|  | CDKAL1   | MED17     |
|  | C4BPB    | BCLAF1    |
|  | NTNG2    | DLL4      |
|  | SPATA7   | TNFSF18   |
|  | KIAA1217 | ACTA2     |
|  | MLANA    | KLKB1     |
|  | ATP1B1   | TLX1NB    |
|  | CMIP     | CYP21A2   |
|  | PICALM   | TRIM39    |
|  | FARP2    | SUCNR1    |
|  | GFOD2    | TACR3     |
|  | IRF6     | CHAF1A    |
|  | CDK5RAP1 | VCP       |
|  | IL26     | NAPEPLD   |
|  | HLA-DRA  | FGFR4     |
|  | HLA-DQB1 | PAM       |
|  | B3GNT2   | RFX5      |
|  | CDH12    | PML       |
|  | EPHA1    | HNRNPD    |
|  | SIK3     | DUSP5     |
|  | CHRDL1   | POU2F3    |
|  | PCIF1    | CTSV      |
|  | TOPBP1   | MTHFS     |
|  | MST1     | TRIM21    |
|  | ANTXR2   | SLC5A7    |
|  | ZNF433   | UNC5B     |
|  | SLC1A7   | PTOV1     |
|  | CCDC63   | PSMA6     |
|  | KCTD2    | CDC6      |
|  | LARP6    | DNM2      |
|  | BMP6     | AFM       |
|  | WDR64    | CCN5      |
|  | CNTN4    | MAMLD1    |
|  | PRKAR2B  | THSD7A    |
|  | IL1RAP   | CFLAR     |
|  | TUSC1    | TNFRSF10A |
|  | HIP1     | DHX58     |
|  | EDC4     | SLC22A4   |
|  | BICRA    | HIST1H4L  |
|  | SPEF2    | GCGR      |

|  |  |         |  |         |
|--|--|---------|--|---------|
|  |  | SLC28A1 |  | CHIC1   |
|  |  | ATXN1   |  | PRTN3   |
|  |  | AKAP6   |  | SLC18A3 |
|  |  | GAK     |  | CHP1    |
|  |  | SP140   |  | ENPP7   |
|  |  |         |  | DAPK3   |
|  |  |         |  | S100A11 |
|  |  |         |  | CPT2    |
|  |  |         |  | BCL2L11 |
|  |  |         |  | UBC     |
|  |  |         |  | ATP10D  |
|  |  |         |  | DAB2IP  |
|  |  |         |  | CDK4    |
|  |  |         |  | EHF     |
|  |  |         |  | HILPDA  |
|  |  |         |  | DDC     |
|  |  |         |  | PTGIS   |
|  |  |         |  | AMPD1   |
|  |  |         |  | PRRX1   |
|  |  |         |  | ABCB6   |
|  |  |         |  | BCL6    |
|  |  |         |  | GHR     |
|  |  |         |  | GMNN    |
|  |  |         |  | ENO2    |
|  |  |         |  | CDKN1B  |
|  |  |         |  | TCIRG1  |
|  |  |         |  | LGII    |
|  |  |         |  | BMPRI1A |
|  |  |         |  | ACSL4   |
|  |  |         |  | PHPT1   |
|  |  |         |  | H6PD    |
|  |  |         |  | EPHA3   |
|  |  |         |  | CALCR   |
|  |  |         |  | TNFSF12 |
|  |  |         |  | DHFR    |
|  |  |         |  | ATP10A  |
|  |  |         |  | TMSB4X  |
|  |  |         |  | SAMD9   |
|  |  |         |  | PLCG2   |
|  |  |         |  | ADARB1  |
|  |  |         |  | PRELP   |
|  |  |         |  | SRSF10  |
|  |  |         |  | FPR3    |
|  |  |         |  | P2RY4   |
|  |  |         |  | INSIG1  |
|  |  |         |  | PDIA2   |
|  |  |         |  | ANKS1B  |

|  |  |  |  |          |
|--|--|--|--|----------|
|  |  |  |  | RGS7     |
|  |  |  |  | ARL6IP4  |
|  |  |  |  | CCR8     |
|  |  |  |  | PELI3    |
|  |  |  |  | HOXD4    |
|  |  |  |  | RNASE2   |
|  |  |  |  | CHRFAM7A |
|  |  |  |  | CLEC1B   |
|  |  |  |  | RAD21    |
|  |  |  |  | SLC2A2   |
|  |  |  |  | IFI16    |
|  |  |  |  | CLDN1    |
|  |  |  |  | SRSF2    |
|  |  |  |  | ZFYVE9   |
|  |  |  |  | HMGA2    |
|  |  |  |  | SLC25A25 |
|  |  |  |  | ECE2     |
|  |  |  |  | CD53     |
|  |  |  |  | GATA6    |
|  |  |  |  | ABHD2    |
|  |  |  |  | CSAD     |
|  |  |  |  | ITGB7    |
|  |  |  |  | PPCDC    |
|  |  |  |  | LCP1     |
|  |  |  |  | TSPAN2   |
|  |  |  |  | VHL      |
|  |  |  |  | RAC2     |
|  |  |  |  | OMD      |
|  |  |  |  | CRHR1    |
|  |  |  |  | GNA13    |
|  |  |  |  | RCN2     |
|  |  |  |  | PIK3R3   |
|  |  |  |  | PLA2G2D  |
|  |  |  |  | ITGA4    |
|  |  |  |  | LMNB1    |
|  |  |  |  | SLC17A2  |
|  |  |  |  | BACH2    |
|  |  |  |  | CYP27B1  |
|  |  |  |  | HGFAC    |
|  |  |  |  | PDLIM1   |
|  |  |  |  | ERCC2    |
|  |  |  |  | CD99L2   |
|  |  |  |  | LPIN2    |
|  |  |  |  | BRD1     |
|  |  |  |  | MSH2     |
|  |  |  |  | XRN2     |
|  |  |  |  | ITGB5    |

|  |  |  |  |          |
|--|--|--|--|----------|
|  |  |  |  | RARB     |
|  |  |  |  | IGF2BP2  |
|  |  |  |  | NEDD4    |
|  |  |  |  | SPI1     |
|  |  |  |  | TAB2     |
|  |  |  |  | SOD1     |
|  |  |  |  | SSTR2    |
|  |  |  |  | S100B    |
|  |  |  |  | SLC30A8  |
|  |  |  |  | SNCA     |
|  |  |  |  | APOC4    |
|  |  |  |  | GALNT4   |
|  |  |  |  | RTL1     |
|  |  |  |  | TCTN1    |
|  |  |  |  | HSPA1B   |
|  |  |  |  | F5       |
|  |  |  |  | PDGFA    |
|  |  |  |  | ANXA4    |
|  |  |  |  | S100A4   |
|  |  |  |  | LIPI     |
|  |  |  |  | PLA2G2E  |
|  |  |  |  | IFNA2    |
|  |  |  |  | SECISBP2 |
|  |  |  |  | CCK      |
|  |  |  |  | MAPT     |
|  |  |  |  | RXRA     |
|  |  |  |  | SP1      |
|  |  |  |  | HGS      |
|  |  |  |  | OSBP2    |
|  |  |  |  | PROS1    |
|  |  |  |  | LIN9     |
|  |  |  |  | GABRR3   |
|  |  |  |  | SLC25A10 |
|  |  |  |  | AP2A2    |
|  |  |  |  | TH       |
|  |  |  |  | ZBTB7A   |
|  |  |  |  | MST1     |
|  |  |  |  | RELA     |
|  |  |  |  | THEMIS   |
|  |  |  |  | KRT27    |
|  |  |  |  | CAVIN3   |
|  |  |  |  | AKAP13   |
|  |  |  |  | SEMA3E   |
|  |  |  |  | CDK1     |
|  |  |  |  | IL7R     |
|  |  |  |  | MARS     |
|  |  |  |  | RPL27A   |



|  |  |  |  |          |
|--|--|--|--|----------|
|  |  |  |  | SGPL1    |
|  |  |  |  | BRD7     |
|  |  |  |  | IL31RA   |
|  |  |  |  | HPGD     |
|  |  |  |  | MAP9     |
|  |  |  |  | CADPS    |
|  |  |  |  | CXCR1    |
|  |  |  |  | CDC42EP3 |
|  |  |  |  | SSTR5    |
|  |  |  |  | FDPS     |
|  |  |  |  | SNF8     |
|  |  |  |  | UBE2Z    |
|  |  |  |  | HTR5A    |
|  |  |  |  | DBI      |
|  |  |  |  | KCTD15   |
|  |  |  |  | HHEX     |
|  |  |  |  | SPARCL1  |
|  |  |  |  | DCLRE1C  |
|  |  |  |  | BAG3     |
|  |  |  |  | PTS      |
|  |  |  |  | DRD2     |
|  |  |  |  | IL2RG    |
|  |  |  |  | GPR6     |
|  |  |  |  | CDKAL1   |
|  |  |  |  | CXCL14   |
|  |  |  |  | MYH15    |
|  |  |  |  | TMEFF2   |
|  |  |  |  | NAT8     |
|  |  |  |  | RHOB     |
|  |  |  |  | GUK1     |
|  |  |  |  | RORC     |
|  |  |  |  | RPTOR    |
|  |  |  |  | ZFHX3    |
|  |  |  |  | CELA1    |
|  |  |  |  | KLRG1    |
|  |  |  |  | SCARB2   |
|  |  |  |  | ATIC     |
|  |  |  |  | RDX      |
|  |  |  |  | YAP1     |
|  |  |  |  | LRRC32   |
|  |  |  |  | EDAR     |
|  |  |  |  | KLRD1    |
|  |  |  |  | YWHAQ    |
|  |  |  |  | GSC      |
|  |  |  |  | LPIN3    |
|  |  |  |  | SSTR4    |
|  |  |  |  | COL5A1   |

|  |  |  |  |          |
|--|--|--|--|----------|
|  |  |  |  | UBAC1    |
|  |  |  |  | EDN2     |
|  |  |  |  | THRA     |
|  |  |  |  | RUNX2    |
|  |  |  |  | ATF1     |
|  |  |  |  | OPTN     |
|  |  |  |  | CHST3    |
|  |  |  |  | POLK     |
|  |  |  |  | PIK3CA   |
|  |  |  |  | IAPP     |
|  |  |  |  | SNX19    |
|  |  |  |  | PRG4     |
|  |  |  |  | NPHS2    |
|  |  |  |  | SOS1     |
|  |  |  |  | ODC1     |
|  |  |  |  | IL17F    |
|  |  |  |  | MVK      |
|  |  |  |  | CPT1A    |
|  |  |  |  | CTSC     |
|  |  |  |  | MPP2     |
|  |  |  |  | CPD      |
|  |  |  |  | SORCS1   |
|  |  |  |  | MICU1    |
|  |  |  |  | CREB3    |
|  |  |  |  | BLVRA    |
|  |  |  |  | NRF1     |
|  |  |  |  | PHF14    |
|  |  |  |  | CAV2     |
|  |  |  |  | SIGLEC5  |
|  |  |  |  | CD79A    |
|  |  |  |  | AKT2     |
|  |  |  |  | CD37     |
|  |  |  |  | SQLE     |
|  |  |  |  | ZDHHC2   |
|  |  |  |  | SLC35A2  |
|  |  |  |  | OPN1LW   |
|  |  |  |  | NOP56    |
|  |  |  |  | MTHFD1   |
|  |  |  |  | SLC5A1   |
|  |  |  |  | PATZ1    |
|  |  |  |  | EZR      |
|  |  |  |  | NLRC4    |
|  |  |  |  | USP48    |
|  |  |  |  | LYZ      |
|  |  |  |  | MAPKAPK5 |
|  |  |  |  | DOCK9    |
|  |  |  |  | TOLLIP   |

|  |  |  |  |           |
|--|--|--|--|-----------|
|  |  |  |  | NFKB2     |
|  |  |  |  | PAX2      |
|  |  |  |  | TCF3      |
|  |  |  |  | GPKOW     |
|  |  |  |  | HDAC4     |
|  |  |  |  | CALCRL    |
|  |  |  |  | PPP1R12A  |
|  |  |  |  | MYOC      |
|  |  |  |  | FHL1      |
|  |  |  |  | ZNF263    |
|  |  |  |  | ITGAL     |
|  |  |  |  | PK4       |
|  |  |  |  | HOXC4     |
|  |  |  |  | SIRT7     |
|  |  |  |  | HOXC5     |
|  |  |  |  | GEM       |
|  |  |  |  | CYP3A4    |
|  |  |  |  | PDE9A     |
|  |  |  |  | BRD4      |
|  |  |  |  | ERBB2     |
|  |  |  |  | SPX       |
|  |  |  |  | REEP5     |
|  |  |  |  | HOXC11    |
|  |  |  |  | TJP1      |
|  |  |  |  | PHEX      |
|  |  |  |  | BDKRB1    |
|  |  |  |  | HOXA9     |
|  |  |  |  | TNFRSF12A |
|  |  |  |  | FOXO6     |
|  |  |  |  | PTPN6     |
|  |  |  |  | UBE2D1    |
|  |  |  |  | CHRNA5    |
|  |  |  |  | TIMD4     |
|  |  |  |  | CDIPT     |
|  |  |  |  | MXD1      |
|  |  |  |  | GPX3      |
|  |  |  |  | TMEM134   |
|  |  |  |  | CDS1      |
|  |  |  |  | BMP10     |
|  |  |  |  | EBI3      |
|  |  |  |  | FUS       |
|  |  |  |  | XRCC1     |
|  |  |  |  | MMEL1     |
|  |  |  |  | HIST1H2BJ |
|  |  |  |  | SP2       |
|  |  |  |  | HSPB8     |
|  |  |  |  | SLC14A1   |

|  |  |  |  |          |
|--|--|--|--|----------|
|  |  |  |  | EMD      |
|  |  |  |  | PAEP     |
|  |  |  |  | SARS     |
|  |  |  |  | PARG     |
|  |  |  |  | BPIFB4   |
|  |  |  |  | SMC2     |
|  |  |  |  | HTR1B    |
|  |  |  |  | F13A1    |
|  |  |  |  | GSR      |
|  |  |  |  | BID      |
|  |  |  |  | HLA-DRA  |
|  |  |  |  | RXRG     |
|  |  |  |  | KLHDC3   |
|  |  |  |  | ARC      |
|  |  |  |  | PCSK1    |
|  |  |  |  | SLC25A32 |
|  |  |  |  | SLC25A14 |
|  |  |  |  | CHRNA3   |
|  |  |  |  | SRI      |
|  |  |  |  | NKAPL    |
|  |  |  |  | SNTB2    |
|  |  |  |  | MSX1     |
|  |  |  |  | NPPB     |
|  |  |  |  | CHRNB4   |
|  |  |  |  | P2RX1    |
|  |  |  |  | BIRC5    |
|  |  |  |  | CHIC2    |
|  |  |  |  | MBD2     |
|  |  |  |  | IFI30    |
|  |  |  |  | UCP3     |
|  |  |  |  | TPM1     |
|  |  |  |  | SAG      |
|  |  |  |  | EREG     |
|  |  |  |  | SSBP1    |
|  |  |  |  | JAK3     |
|  |  |  |  | PGRMC1   |
|  |  |  |  | SLC25A43 |
|  |  |  |  | LYN      |
|  |  |  |  | SERGEF   |
|  |  |  |  | SIRT5    |
|  |  |  |  | BTK      |
|  |  |  |  | CHM      |
|  |  |  |  | TNFSF9   |
|  |  |  |  | AGL      |
|  |  |  |  | DIRAS3   |
|  |  |  |  | FANCC    |
|  |  |  |  | ADAMTS12 |

|  |  |  |  |          |
|--|--|--|--|----------|
|  |  |  |  | BRCA2    |
|  |  |  |  | QPCT     |
|  |  |  |  | TFG      |
|  |  |  |  | CASP5    |
|  |  |  |  | MAP3K7   |
|  |  |  |  | MATN2    |
|  |  |  |  | KDM5B    |
|  |  |  |  | PCDH9    |
|  |  |  |  | SPTLC3   |
|  |  |  |  | AS3MT    |
|  |  |  |  | ERC2     |
|  |  |  |  | IGF2R    |
|  |  |  |  | IRF7     |
|  |  |  |  | RBM10    |
|  |  |  |  | GYPA     |
|  |  |  |  | CCNA2    |
|  |  |  |  | SLC27A2  |
|  |  |  |  | IL15RA   |
|  |  |  |  | CCNT1    |
|  |  |  |  | TCP1     |
|  |  |  |  | PLA2G4A  |
|  |  |  |  | POLR2I   |
|  |  |  |  | PIAS4    |
|  |  |  |  | HMOX2    |
|  |  |  |  | PQBP1    |
|  |  |  |  | IL2RB    |
|  |  |  |  | SHC1     |
|  |  |  |  | VSTM2B   |
|  |  |  |  | HOXA10   |
|  |  |  |  | TUBA4B   |
|  |  |  |  | FHIT     |
|  |  |  |  | ZNF609   |
|  |  |  |  | GPR35    |
|  |  |  |  | SUMO4    |
|  |  |  |  | MGMT     |
|  |  |  |  | P2RY1    |
|  |  |  |  | RNASE6   |
|  |  |  |  | TBX20    |
|  |  |  |  | NPHS1    |
|  |  |  |  | GDF6     |
|  |  |  |  | G3BP1    |
|  |  |  |  | PIK3R1   |
|  |  |  |  | CCDC62   |
|  |  |  |  | TUBA4A   |
|  |  |  |  | SERPINA7 |
|  |  |  |  | GJA3     |
|  |  |  |  | HOXA6    |

|  |  |  |  |            |
|--|--|--|--|------------|
|  |  |  |  | USF2       |
|  |  |  |  | LACTB      |
|  |  |  |  | WNT8B      |
|  |  |  |  | MYOM2      |
|  |  |  |  | IL23A      |
|  |  |  |  | CYP3A5     |
|  |  |  |  | PPM1A      |
|  |  |  |  | NGFR       |
|  |  |  |  | CXCR5      |
|  |  |  |  | TBC1D30    |
|  |  |  |  | BMP1       |
|  |  |  |  | ATP2B4     |
|  |  |  |  | ANKS1A     |
|  |  |  |  | TSBP1      |
|  |  |  |  | STIM2      |
|  |  |  |  | ALPK1      |
|  |  |  |  | HSD17B6    |
|  |  |  |  | ATG7       |
|  |  |  |  | NTF3       |
|  |  |  |  | AC010330.1 |
|  |  |  |  | MECP2      |
|  |  |  |  | SAMSN1     |
|  |  |  |  | XCL1       |
|  |  |  |  | ITGAX      |
|  |  |  |  | PDX1       |
|  |  |  |  | CCNG2      |
|  |  |  |  | CCNA1      |
|  |  |  |  | CD93       |
|  |  |  |  | TNFRSF10B  |
|  |  |  |  | UBR5       |
|  |  |  |  | CERK       |
|  |  |  |  | PES1       |
|  |  |  |  | IL4R       |
|  |  |  |  | SCN5A      |
|  |  |  |  | CCDC88B    |
|  |  |  |  | SLC2A9     |
|  |  |  |  | CSMD1      |
|  |  |  |  | CDKN2B-AS1 |
|  |  |  |  | DYRK1A     |
|  |  |  |  | TTC3       |
|  |  |  |  | APELA      |
|  |  |  |  | IL10RB     |
|  |  |  |  | TRIM31     |
|  |  |  |  | FCAR       |
|  |  |  |  | GBP6       |
|  |  |  |  | ABRA       |
|  |  |  |  | ATF7IP     |

|  |  |  |  |           |
|--|--|--|--|-----------|
|  |  |  |  | IFT122    |
|  |  |  |  | MORC3     |
|  |  |  |  | CBR1      |
|  |  |  |  | TMEM50B   |
|  |  |  |  | HSPA12B   |
|  |  |  |  | PF4V1     |
|  |  |  |  | RELB      |
|  |  |  |  | TTN       |
|  |  |  |  | HLA-DRB1  |
|  |  |  |  | PRRC2A    |
|  |  |  |  | NBPF3     |
|  |  |  |  | TYR       |
|  |  |  |  | MLANA     |
|  |  |  |  | GPC5      |
|  |  |  |  | FGFR2     |
|  |  |  |  | DOCK3     |
|  |  |  |  | C1GALT1   |
|  |  |  |  | ABCB11    |
|  |  |  |  | G6PC2     |
|  |  |  |  | ERN1      |
|  |  |  |  | THADA     |
|  |  |  |  | LBH       |
|  |  |  |  | RYR2      |
|  |  |  |  | TMPRSS6   |
|  |  |  |  | NRDE2     |
|  |  |  |  | CTSH      |
|  |  |  |  | BIN2      |
|  |  |  |  | PRIM1     |
|  |  |  |  | 1-Mar     |
|  |  |  |  | SPESP1    |
|  |  |  |  | LPAR3     |
|  |  |  |  | GJB1      |
|  |  |  |  | DMTN      |
|  |  |  |  | KCNMA1    |
|  |  |  |  | TRPM8     |
|  |  |  |  | SNRPG     |
|  |  |  |  | POLG      |
|  |  |  |  | SKIL      |
|  |  |  |  | TTLL5     |
|  |  |  |  | ABCB4     |
|  |  |  |  | EXTL2     |
|  |  |  |  | BTD       |
|  |  |  |  | TNFRSF11A |
|  |  |  |  | EPDR1     |
|  |  |  |  | ADGRL3    |
|  |  |  |  | REST      |
|  |  |  |  | RFTN1     |

|  |  |  |  |          |
|--|--|--|--|----------|
|  |  |  |  | DSG1     |
|  |  |  |  | IL26     |
|  |  |  |  | PRKG2    |
|  |  |  |  | SLC28A1  |
|  |  |  |  | POLR1D   |
|  |  |  |  | CDH12    |
|  |  |  |  | KCNQ1    |
|  |  |  |  | ANTXR2   |
|  |  |  |  | GLIS3    |
|  |  |  |  | RGS6     |
|  |  |  |  | BAG6     |
|  |  |  |  | SF3B4    |
|  |  |  |  | CRACR2A  |
|  |  |  |  | SLC45A2  |
|  |  |  |  | CHEK2    |
|  |  |  |  | SLC46A3  |
|  |  |  |  | NUBPL    |
|  |  |  |  | RTEL1    |
|  |  |  |  | BCL11A   |
|  |  |  |  | POP1     |
|  |  |  |  | MIR137   |
|  |  |  |  | PZP      |
|  |  |  |  | ZNF433   |
|  |  |  |  | SLC6A1   |
|  |  |  |  | OCM2     |
|  |  |  |  | SDK2     |
|  |  |  |  | TSEN15   |
|  |  |  |  | HLA-DOA  |
|  |  |  |  | HLA-DQB1 |
|  |  |  |  | ZFP64    |
|  |  |  |  | CDKL1    |
|  |  |  |  | NHEJ1    |
|  |  |  |  | DLEU7    |
|  |  |  |  | SLC14A2  |
|  |  |  |  | MROH2A   |
|  |  |  |  | LMX1B    |
|  |  |  |  | TTL7     |
|  |  |  |  | ATL1     |
|  |  |  |  | ARL5B    |
|  |  |  |  | HMG20A   |
|  |  |  |  | SLC22A11 |
|  |  |  |  | TP53INP1 |
|  |  |  |  | DGKD     |
|  |  |  |  | FRMD6    |
|  |  |  |  | CLEC16A  |
|  |  |  |  | ADGRL1   |
|  |  |  |  | C15orf32 |



|  |  |  |  |          |
|--|--|--|--|----------|
|  |  |  |  | CENPC    |
|  |  |  |  | JMD1C    |
|  |  |  |  | CEP85L   |
|  |  |  |  | NLRP11   |
|  |  |  |  | PRB2     |
|  |  |  |  | STARD3NL |
|  |  |  |  | PBX2P1   |
|  |  |  |  | OR5H2    |
|  |  |  |  | SLC22A1  |
|  |  |  |  | TNPO3    |
|  |  |  |  | NUP205   |
|  |  |  |  | MPC2     |
|  |  |  |  | RNU7-62P |
|  |  |  |  | CMIP     |
|  |  |  |  | MTCH2    |
|  |  |  |  | ELMO1    |
|  |  |  |  | DCC      |
|  |  |  |  | ZNF330   |
|  |  |  |  | CACNB2   |
|  |  |  |  | KCNC4    |
|  |  |  |  | SOCS6    |
|  |  |  |  | C1QTNF7  |
|  |  |  |  | ILKAP    |
|  |  |  |  | BARD1    |
|  |  |  |  | CDC42BPB |
|  |  |  |  | TCHHL1   |
|  |  |  |  | KRT18P32 |
|  |  |  |  | POLR2A   |
|  |  |  |  | C5orf56  |
|  |  |  |  | TAB1     |
|  |  |  |  | DCP1B    |
|  |  |  |  | PKNOX2   |
|  |  |  |  | DUSP14   |
|  |  |  |  | TNRC6B   |
|  |  |  |  | FADS3    |
|  |  |  |  | IKZF2    |
|  |  |  |  | TIMM23   |
|  |  |  |  | CMTM8    |
|  |  |  |  | IRX4     |
|  |  |  |  | ANKLE1   |
|  |  |  |  | SHISA9   |
|  |  |  |  | ACSM1    |
|  |  |  |  | RAB37    |
|  |  |  |  | SEMA3C   |
|  |  |  |  | RBM38    |
|  |  |  |  | CDCA7L   |
|  |  |  |  | CASC15   |

|  |  |  |  |          |
|--|--|--|--|----------|
|  |  |  |  | MAP2K5   |
|  |  |  |  | MCCC1    |
|  |  |  |  | TGM5     |
|  |  |  |  | SLTM     |
|  |  |  |  | CTNND2   |
|  |  |  |  | ADH7     |
|  |  |  |  | CD58     |
|  |  |  |  | IL12A    |
|  |  |  |  | MICAL3   |
|  |  |  |  | LINGO1   |
|  |  |  |  | KLHDC8B  |
|  |  |  |  | HLA-DQA2 |
|  |  |  |  | MSH5     |
|  |  |  |  | AK4      |
|  |  |  |  | CHL1     |
|  |  |  |  | CRTC1    |
|  |  |  |  | CDK10    |
|  |  |  |  | UNC13C   |
|  |  |  |  | SYT17    |
|  |  |  |  | TFF1     |
|  |  |  |  | API5     |
|  |  |  |  | ZNF385D  |
|  |  |  |  | CPVL     |
|  |  |  |  | GLYATL3  |
|  |  |  |  | OSBPL1A  |
|  |  |  |  | KIRREL3  |
|  |  |  |  | MYH7B    |
|  |  |  |  | TNNT3    |
|  |  |  |  | HNF1B    |
|  |  |  |  | HTR4     |
|  |  |  |  | XPO7     |
|  |  |  |  | ADAMTS20 |
|  |  |  |  | KCTD2    |
|  |  |  |  | MICU3    |
|  |  |  |  | ANKRD55  |
|  |  |  |  | MTMR3    |
|  |  |  |  | BAZ1B    |
|  |  |  |  | BTBD9    |
|  |  |  |  | BCAP29   |
|  |  |  |  | OR2M7    |
|  |  |  |  | HLA-A    |
|  |  |  |  | DPP6     |
|  |  |  |  | ZNF536   |
|  |  |  |  | LMO4     |
|  |  |  |  | PHF21A   |
|  |  |  |  | SLC22A12 |
|  |  |  |  | TAGAP    |

|  |  |  |  |         |
|--|--|--|--|---------|
|  |  |  |  | PRC1    |
|  |  |  |  | BEST1   |
|  |  |  |  | PDE2A   |
|  |  |  |  | BCO1    |
|  |  |  |  | CEP112  |
|  |  |  |  | DCSTAMP |
|  |  |  |  | HLA-C   |
|  |  |  |  | MPPED2  |
|  |  |  |  | CGNL1   |
|  |  |  |  | ZNF462  |
|  |  |  |  | RFC3    |
|  |  |  |  | IBSP    |

## Supplementary Table 2:

### Lists of genes that HBPs associated with myocardial Ischemia, myocardial infarction, myocarditis and atherosclerosis

| Myocardial Ischemia | Myocardial infarction | Myocarditis | Atherosclerosis |
|---------------------|-----------------------|-------------|-----------------|
| TIMP3               | VTN                   | TGM2        | VTN             |
| TGM2                | TIMP3                 | TG          | TIMP3           |
| SOD3                | SORT1                 | PRL         | TGM2            |
| SOD1                | SOD3                  | PLAU        | TGFB2           |
| SHH                 | SOD1                  | MPO         | TFRC            |
| SCN5A               | SCN5A                 | MBP         | SORT1           |
| SAA1                | SAA2                  | LGALS9      | SOD3            |
| PRL                 | SAA1                  | ITGA1       | SHH             |
| PON2                | PRL                   | IL5         | SAA2            |
| PLG                 | PON2                  | IL4         | SAA1            |
| PLAT                | PLG                   | IL3         | PRL             |
| PECAM1              | PLAU                  | IL2         | PRDX4           |
| MPO                 | PLAT                  | IL10        | PON3            |
| MMP14               | PECAM1                | IFNG        | PON2            |
| MET                 | MPO                   | HMGB1       | PLG             |
| LDLR                | MMP14                 | GDNF        | PLAU            |
| INHBA               | MET                   | F2          | PLAT            |
| IL4                 | LIFR                  | CXCL8       | PLA2G5          |
| IL2                 | LGALS9                | CXCL12      | PECAM1          |
| IL10                | LDLR                  | CP          | OCN             |
| IHH                 | LAMA3                 | APOE        | MPO             |
| IFNG                | ITIH3                 |             | MMP14           |
| HSPG2               | ITGA1                 |             | LGALS9          |
| HMGB1               | INSR                  |             | LDLR            |
| GSN                 | INHBA                 |             | INSR            |
| FGF5                | IL7                   |             | INHBA           |
| F2                  | IL5                   |             | IL7             |
| ELN                 | IL4                   |             | IL5             |
| CXCL8               | IL2                   |             | IL4             |
| CXCL12              | IL10                  |             | IL3             |
| CTSG                | IHH                   |             | IL2             |
| COMT                | IFNG                  |             | IL10            |
| APOE                | HSPG2                 |             | IFNG            |
| APOB                | HRG                   |             | HSPG2           |
|                     | HP                    |             | HP              |
|                     | HMGB1                 |             | HMGB1           |
|                     | GSN                   |             | GSN             |
|                     | GDNF                  |             | GDNF            |
|                     | GC                    |             | GC              |
|                     | FST                   |             | FST             |

|  |         |  |        |
|--|---------|--|--------|
|  | FGF9    |  | FGB    |
|  | FGF16   |  | FGA    |
|  | FGB     |  | F2     |
|  | FGA     |  | F12    |
|  | FETUB   |  | F11    |
|  | F2      |  | F10    |
|  | F12     |  | ELN    |
|  | F11     |  | ECE1   |
|  | F10     |  | CXCL8  |
|  | ELN     |  | CXCL12 |
|  | ECE1    |  | CTSG   |
|  | CXCL8   |  | CPB2   |
|  | CXCL12  |  | CP     |
|  | CTSG    |  | COMT   |
|  | CPB2    |  | COMP   |
|  | CP      |  | COL4A2 |
|  | COMT    |  | COL4A1 |
|  | COL5A1  |  | COL1A2 |
|  | COL4A2  |  | CDH8   |
|  | COL4A1  |  | BTC    |
|  | COL3A1  |  | ARG1   |
|  | COL1A2  |  | APOE   |
|  | COL1A1  |  | APOB   |
|  | COL18A1 |  | ABCG5  |
|  | C9      |  | AAMP   |
|  | AZU1    |  |        |
|  | ARG1    |  |        |
|  | APOE    |  |        |
|  | APOB    |  |        |
|  | ADRA1B  |  |        |
|  | ABCG5   |  |        |

### Supplementary Table 3:

#### Lists of genes of non-HBPs associated with myocardial Ischemia, myocardial infarction, myocarditis and atherosclerosis

| Myocardial Ischemia | Myocardial infarction | Myocarditis | Atherosclerosis |
|---------------------|-----------------------|-------------|-----------------|
| ABCA1               | 1-Mar                 | ABCD1       | 1-Mar           |
| ABCC6               | A2M                   | ACAT2       | A2M             |
| ABCC8               | ABCA1                 | ACE         | ABCA1           |
| ABO                 | ABCA7                 | ACE2        | ABCA12          |
| ACADVL              | ABCB1                 | ACHE        | ABCA2           |
| ACE                 | ABCC6                 | ACLY        | ABCA5           |
| ACE2                | ABCC8                 | ACP5        | ABCA7           |
| ACHE                | ABCC9                 | ADAM17      | ABCB1           |
| ACR                 | ABCD1                 | ADAM9       | ABCB11          |
| ACVR2B              | ABCG1                 | ADAMTS1     | ABCB4           |
| ADA                 | ABCG2                 | ADAR        | ABCB6           |
| ADAMTS13            | ABL1                  | ADRB1       | ABCC1           |
| ADI1                | ABO                   | ADRB2       | ABCC6           |
| ADM                 | AC010330.1            | AFP         | ABCC8           |
| ADM2                | ACADM                 | AGTR1       | ABCD1           |
| ADORA1              | ACADS                 | AHR         | ABCD2           |
| ADORA2B             | ACD                   | AIM2        | ABCE1           |
| ADRB1               | ACE                   | AKT1        | ABCG1           |
| ADRB2               | ACE2                  | AKTIP       | ABCG4           |
| ADRB3               | ACHE                  | ALB         | ABCG8           |
| AGGF1               | ACKR2                 | ALOX5       | ABHD2           |
| AGT                 | ACKR3                 | ALPK1       | ABL1            |
| AGTR1               | ACOX1                 | ANG         | ABO             |
| AGTR2               | ACP5                  | ANGPT1      | ABR             |
| AGXT                | ACPP                  | ANPEP       | ABRA            |
| AHR                 | ACR                   | ANXA5       | AC010330.1      |
| AHSG                | ACSL1                 | ANXA6       | ACADS           |
| AHSP                | ACSL6                 | APEX1       | ACD             |
| AIF1                | ACSM3                 | APLN        | ACE             |
| AIFM1               | ACTA2                 | APLNR       | ACE2            |
| AK2                 | ACTB                  | AQP4        | ACER1           |
| AK3                 | ACTG1                 | AR          | ACHE            |
| AKIP1               | ACVR1B                | ARSA        | ACKR1           |
| AKR1B1              | ACVRL1                | ASGR1       | ACKR3           |
| AKT1                | ADA                   | ATF4        | ACLY            |
| ALB                 | ADAM10                | ATP2A2      | ACOT7           |
| ALDH2               | ADAM15                | AVP         | ACOX1           |
| ALOX15              | ADAM17                | B2M         | ACP1            |
| ALOX5               | ADAM8                 | BAG3        | ACP5            |
| ANG                 | ADAMDEC1              | BCHE        | ACPP            |
| ANGPT1              | ADAMTS1               | BCKDK       | ACR             |
| ANGPT2              | ADAMTS13              | BCL2L12     | ACSL1           |

|         |         |         |          |
|---------|---------|---------|----------|
| ANGPTL3 | ADAMTS2 | BCL6    | ACSL4    |
| ANK1    | ADAMTS4 | BMP2    | ACSM1    |
| ANO1    | ADAMTS7 | BMPR2   | ACSM3    |
| ANPEP   | ADAMTS8 | BTG3    | ACTA2    |
| ANXA1   | ADCY10  | C3      | ACTB     |
| ANXA5   | ADCY3   | C5      | ACTG1    |
| ANXA6   | ADCY5   | C5orf38 | ACTL7B   |
| AOC3    | ADCY6   | CA4     | ACVRL1   |
| AOPEP   | ADD1    | CABIN1  | ADA      |
| APAF1   | ADGB    | CADM1   | ADAM10   |
| APLN    | ADH1C   | CALCR   | ADAM12   |
| APLNR   | ADI1    | CALU    | ADAM15   |
| APOA1   | ADIPOQ  | CASP1   | ADAM17   |
| APP     | ADIPOR1 | CASP3   | ADAM33   |
| AQP1    | ADIPOR2 | CASP8   | ADAM8    |
| AQP4    | ADK     | CASP9   | ADAM9    |
| ARC     | ADM     | CAST    | ADAMTS1  |
| AREG    | ADM2    | CAT     | ADAMTS12 |
| ARID3A  | ADORA1  | CAV1    | ADAMTS13 |
| ARSA    | ADORA2A | CCL11   | ADAMTS18 |
| ASGR1   | ADORA2B | CCL2    | ADAMTS20 |
| ASGR2   | ADORA3  | CCL20   | ADAMTS4  |
| ASIC2   | ADRA1A  | CCL26   | ADAMTS5  |
| ASIC3   | ADRA1D  | CCL27   | ADAMTS7  |
| ATF3    | ADRA2A  | CCL3    | ADARB1   |
| ATF4    | ADRA2B  | CCL4    | ADARB2   |
| ATF6    | ADRB1   | CCL5    | ADCY10   |
| ATG3    | ADRB2   | CCL7    | ADCY8    |
| ATP5IF1 | ADRB3   | CCN1    | ADCY9    |
| AVP     | AFM     | CCN2    | ADCYAP1  |
| AVPR2   | AFP     | CCR1    | ADD1     |
| BAMBI   | AGBL2   | CCR2    | ADGRE2   |
| BCHE    | AGER    | CCR3    | ADGRE5   |
| BCL2    | AGGF1   | CCR4    | ADGRL1   |
| BCL2A1  | AGL     | CCR5    | ADGRL3   |
| BCL2L11 | AGPAT1  | CCR7    | ADH7     |
| BCLAF1  | AGRN    | CCR8    | ADHFE1   |
| BDKRB2  | AGT     | CD14    | ADI1     |
| BDNF    | AGTR1   | CD163   | ADIPOQ   |
| BECN1   | AGTR2   | CD19    | ADIPOR1  |
| BMP2    | AGXT    | CD2     | ADIPOR2  |
| BMP4    | AGXT2   | CD209   | ADK      |
| BNIP3   | AHSG    | CD27    | ADM      |
| BRD1    | AHSP    | CD274   | ADM2     |
| BSG     | AIDA    | CD276   | ADORA1   |
| C1QTNF1 | AIFM1   | CD28    | ADORA2A  |
| C5AR1   | AIRE    | CD34    | ADORA2B  |

|         |         |         |         |
|---------|---------|---------|---------|
| C5orf38 | AK1     | CD38    | ADORA3  |
| CA1     | AKAP1   | CD3D    | ADRB1   |
| CABIN1  | AKAP12  | CD4     | ADRB2   |
| CACNA1C | AKAP6   | CD40    | ADRB3   |
| CACNA1D | AKIP1   | CD40LG  | ADTRP   |
| CACNA1F | AKR1B1  | CD44    | AEBP1   |
| CACNA1S | AKT1    | CD55    | AFM     |
| CADM1   | AKT2    | CD68    | AGER    |
| CALCRL  | ALAS2   | CD69    | AGGF1   |
| CALR    | ALB     | CD70    | AGL     |
| CASC1   | ALCAM   | CD72    | AGT     |
| CASP1   | ALDH1A2 | CD80    | AGTR1   |
| CASP2   | ALDH2   | CD83    | AGTR2   |
| CASP3   | ALG1    | CD86    | AGXT    |
| CASP8   | ALK     | CDK9    | AGXT2   |
| CASP9   | ALMS1   | CDKN2A  | AHCY    |
| CASR    | ALOX12  | CEACAM5 | AHI1    |
| CAST    | ALOX15  | CEBPA   | AHR     |
| CASZ1   | ALOX5   | CEBPB   | AHRR    |
| CAT     | ALOX5AP | CENPA   | AHSG    |
| CAV1    | ALPI    | CFD     | AHSP    |
| CAV3    | ALPK1   | CFLAR   | AIF1    |
| CBFA2T2 | AMELX   | CFP     | AIFM1   |
| CCL18   | AMH     | CGAS    | AIM2    |
| CCL19   | AMIGO2  | CHST15  | AIRE    |
| CCL2    | AMN     | CHUK    | AK4     |
| CCL20   | AMPD1   | CIITA   | AKAP12  |
| CCL5    | AMT     | CISH    | AKAP13  |
| CCL7    | AMY1C   | CLU     | AKR1B1  |
| CCN1    | ANAPC5  | CMA1    | AKT1    |
| CCN2    | ANG     | CNOT7   | AKT2    |
| CCR2    | ANGPT1  | CNP     | AKTIP   |
| CCR5    | ANGPT2  | CNR1    | ALB     |
| CCS     | ANGPTL2 | CNR2    | ALCAM   |
| CD151   | ANGPTL3 | CORT    | ALDH2   |
| CD180   | ANGPTL4 | CPE     | ALG1    |
| CD274   | ANK2    | CR1     | ALOX12  |
| CD34    | ANK3    | CR2     | ALOX15  |
| CD36    | ANPEP   | CRP     | ALOX15B |
| CD38    | ANTXR2  | CSDE1   | ALOX5   |
| CD4     | ANXA1   | CSF1    | ALOX5AP |
| CD40    | ANXA13  | CSF1R   | ALPK1   |
| CD40LG  | ANXA2   | CSF2    | ALX1    |
| CD47    | ANXA3   | CSF3    | AMD1    |
| CD59    | ANXA5   | CSR3P3  | AMH     |
| CDH5    | ANXA7   | CTF1    | AMOT    |
| CDK2    | AOC1    | CTH     | AMPD1   |



|        |          |          |          |
|--------|----------|----------|----------|
| CDK9   | AOC2     | CTLA4    | ANG      |
| CDKN1A | AOC3     | CTSB     | ANGPT1   |
| CDKN2A | AOPEP    | CTSK     | ANGPT2   |
| CDS1   | AP3D1    | CX3CL1   | ANGPTL2  |
| CEBPZ  | APCS     | CX3CR1   | ANGPTL3  |
| CETP   | APELA    | CXADR    | ANGPTL4  |
| CFB    | APEX1    | CXCL1    | ANGPTL6  |
| CFI    | APLN     | CXCL10   | ANGPTL8  |
| CFTR   | APLNR    | CXCL13   | ANK1     |
| CHI3L1 | APOA1    | CXCL9    | ANKLE1   |
| CHUK   | APOA2    | CXCR3    | ANKRD55  |
| CIRBP  | APOA4    | CXCR5    | ANKS1A   |
| CLCN2  | APOA5    | CYBB     | ANKS1B   |
| CLEC6A | APOBEC3G | CYCS     | ANO3     |
| CLEC7A | APOC1    | CYP11B2  | ANPEP    |
| CLU    | APOC2    | DDIT3    | ANTXR2   |
| CMA1   | APOC3    | DDX53    | ANXA1    |
| CMKLR1 | APOD     | DES      | ANXA13   |
| CNP    | APOH     | DHX58    | ANXA2    |
| CNPY2  | APOL1    | DLD      | ANXA4    |
| CNR1   | APOM     | DMD      | ANXA5    |
| CNR2   | APP      | DNTT     | ANXA7    |
| COMMD1 | AQP1     | DSP      | AOC1     |
| CPA1   | AQP2     | DYSF     | AOC2     |
| CPB1   | AQP3     | EBI3     | AOC3     |
| CPOX   | AQP4     | EDN1     | AOPEP    |
| CPSF4  | AR       | EDNRA    | AP2A2    |
| CR1    | ARC      | EIF2AK2  | AP5Z1    |
| CRBN   | AREG     | EIF4E    | APAF1    |
| CREB3  | ARID3A   | EIF4EBP1 | APCS     |
| CREG1  | ARIH1    | EMB      | APEH     |
| CRH    | ARNT     | EMP1     | APELA    |
| CRP    | ARNTL    | EPAS1    | APEX1    |
| CRYAB  | ARRB1    | EPHA3    | APH1B    |
| CSF2   | ARSA     | EPHB2    | API5     |
| CSF3   | ARSB     | EPO      | APLN     |
| CTH    | ARSI     | ESR1     | APLNR    |
| CTNNB1 | ART3     | ESR2     | APOA1    |
| CTSB   | ASAH2    | F2R      | APOA2    |
| CTSD   | ASF1A    | F2RL1    | APOA4    |
| CTSL   | ASGR1    | F3       | APOA5    |
| CX3CL1 | ASIC3    | F8       | APOBEC1  |
| CXCL1  | ASRGL1   | FASLG    | APOBEC3G |
| CXCL16 | ATF3     | FGF2     | APOBR    |
| CXCL17 | ATF6     | FGF23    | APOC1    |
| CXCR2  | ATF7IP   | FGL2     | APOC2    |
| CXCR4  | ATG7     | FIP1L1   | APOC3    |

|         |          |          |          |
|---------|----------|----------|----------|
| CXCR6   | ATM      | FLNA     | APOC4    |
| CYBB    | ATP10A   | FLT3LG   | APOD     |
| CYCS    | ATP10D   | FN1      | APOF     |
| CYP2E1  | ATP1B1   | FOS      | APOH     |
| CYP2J2  | ATP2A2   | FOXP3    | APOL1    |
| CYSLTR2 | ATP2B1   | FUT4     | APOM     |
| DAXX    | ATP6AP2  | FUT7     | APP      |
| DDAH1   | ATP7A    | FYN      | APPL1    |
| DDIT3   | ATP8A2   | G6PD     | AQP1     |
| DES     | ATXN1    | GAPDH    | AQP7     |
| DIAPH1  | ATXN2    | GBP1     | AR       |
| DKK1    | ATXN7L3B | GH1      | ARC      |
| DLL1    | AURKB    | GJA1     | ARG2     |
| DMD     | AVP      | GJC1     | ARHGAP18 |
| DNAH5   | AVPR1A   | GLB1     | ARHGEF26 |
| DNASE1  | AVPR2    | GOLGA2   | ARID5B   |
| DNM1L   | AXDND1   | GP5      | ARL5B    |
| DPP4    | AXL      | GPI      | ARL6IP4  |
| DRD2    | AZIN2    | GPX1     | ARNTL    |
| DSE     | B2M      | GSK3B    | ARRB1    |
| DST     | B3GNT2   | GZMB     | ARRB2    |
| DTNA    | BAG3     | HAMP     | ARSA     |
| DYSF    | BAX      | HBEGF    | ARSB     |
| EDN1    | BBOX1    | HDAC11   | ARSI     |
| EDNRA   | BBS9     | HDAC2    | AS3MT    |
| EDNRB   | BCAS3    | HECA     | ASAH2    |
| EEF2    | BCHE     | HGF      | ASCL1    |
| EFNA1   | BCL2     | HIF1A    | ATF1     |
| EGLN1   | BCL2A1   | HIST1H4L | ATF2     |
| EGLN3   | BCL2L11  | HLA-DQB1 | ATF3     |
| EGR1    | BCLAF1   | HMGCR    | ATF4     |
| EIF2AK1 | BCR      | HMGXB3   | ATF7IP   |
| EIF2AK2 | BDKRB1   | HMOX1    | ATG13    |
| EIF2S1  | BDKRB2   | HNF1A    | ATG16L1  |
| EIF5A   | BDNF     | HPRT1    | ATG5     |
| ELANE   | BECN1    | HRH1     | ATG7     |
| ELOVL6  | BGLAP    | HSF1     | ATIC     |
| EMD     | BGN      | HSP90B1  | ATL1     |
| EMP1    | BICRA    | HSPA5    | ATM      |
| ENPEP   | BID      | HTR3A    | ATP10A   |
| ENTPD1  | BIN1     | HTT      | ATP10D   |
| EPAS1   | BLVRB    | HUNK     | ATP2B1   |
| EPHB2   | BMF      | ICAM1    | ATP2B4   |
| EPHB4   | BMI1     | ICOS     | ATP7A    |
| EPO     | BMP1     | ICOSLG   | ATXN2    |
| EPOR    | BMP10    | IDO1     | AURKA    |
| EPRS    | BMP2     | IDS      | AVP      |

|         |           |          |         |
|---------|-----------|----------|---------|
| ESD     | BMP4      | IFIH1    | AVPR2   |
| ESR1    | BMP6      | IFNA1    | AXL     |
| ESR2    | BMP7      | IFNA2    | B2M     |
| ETV3    | BMPER     | IFNA6    | BACE1   |
| F2R     | BNC1      | IFNB1    | BACH2   |
| F2RL1   | BNIP3     | IFNL2    | BAG3    |
| F3      | BNIP3L    | IL12RB1  | BAG6    |
| F7      | BOK       | IL13     | BAMBI   |
| F8      | BRAF      | IL15     | BARD1   |
| FABP3   | BRAP      | IL17A    | BAX     |
| FABP4   | BRCA1     | IL17D    | BAZ1B   |
| FADD    | BRD1      | IL17RA   | BCAP29  |
| FAM168B | BRD4      | IL18     | BCHE    |
| FAP     | BRINP3    | IL18BP   | BCL11A  |
| FASLG   | BSG       | IL1A     | BCL2A1  |
| FCER1G  | BTF3      | IL1B     | BCL2L11 |
| FDPS    | BTG2      | IL1R1    | BCL3    |
| FGF1    | BTG3      | IL1RN    | BCL6    |
| FGF19   | BTN2A1    | IL21     | BCLAF1  |
| FGF2    | C10orf142 | IL21R    | BCO1    |
| FGF21   | C1QTNF1   | IL22     | BCR     |
| FGF23   | C1QTNF3   | IL32     | BDKRB1  |
| FGF4    | C3        | IL33     | BDKRB2  |
| FGFR1   | C3AR1     | IL37     | BDNF    |
| FGFR2   | C4A       | IL6      | BECN1   |
| FGFR3   | C4B       | IL9      | BEST1   |
| FGFR4   | C4BPA     | ILK      | BGLAP   |
| FGL2    | C4BPB     | INS      | BGN     |
| FHL2    | C5        | IRAK1    | BID     |
| FN1     | C5AR1     | IRAK4    | BIN2    |
| FOS     | C5orf38   | IRF1     | BIRC2   |
| FOXP3   | C6orf15   | IRF3     | BIRC5   |
| FPR2    | CA1       | IRF4     | BIRC6   |
| FSTL1   | CA3       | IRF7     | BLVRA   |
| FXYD1   | CA4       | IRF9     | BLVRB   |
| FZD2    | CA5B      | ISG15    | BMF     |
| G6PD    | CA6       | ITGA6    | BMP1    |
| GAPDH   | CACNA1B   | ITK      | BMP10   |
| GAST    | CACNA1C   | IVNS1ABP | BMP2    |
| GATA4   | CACNA1D   | JAK1     | BMP4    |
| GCH1    | CACNA1F   | JAK2     | BMP7    |
| GDF11   | CACNA1S   | JAK3     | BMP8A   |
| GDF15   | CACNA2D2  | JUN      | BMPER   |
| GFAP    | CACNB3    | KCNN4    | BMPR1A  |
| GH1     | CACYBP    | KLF2     | BMPR2   |
| GHRL    | CADM1     | KLKB1    | BPIFB4  |
| GHSR    | CALB1     | KLRD1    | BRAP    |

|          |         |        |           |
|----------|---------|--------|-----------|
| GJA1     | CALB2   | KLRK1  | BRCA1     |
| GLA      | CALCR   | KMO    | BRCA2     |
| GLB1     | CALD1   | LAG3   | BRD1      |
| GLP1R    | CALR    | LCN2   | BRD4      |
| GLRX3    | CAMKK1  | LDB3   | BRD7      |
| GOT2     | CAMP    | LDHA   | BRINP3    |
| GP6      | CANX    | LEP    | BSCL2     |
| GPER1    | CAPN10  | LEPR   | BSG       |
| GPI      | CARD17  | LGALS1 | BTBD9     |
| GPX1     | CARD8   | LGALS3 | BTD       |
| GRAP2    | CARD9   | LRPAP1 | BTG3      |
| GRK2     | CASC1   | LTA    | BTK       |
| GRN      | CASP1   | LY6E   | BTNL2     |
| GSC      | CASP12  | MAEA   | C10orf113 |
| GSDMD    | CASP3   | MALT1  | C15orf32  |
| GSK3B    | CASP8   | MAPK3  | C1GALT1   |
| GUCY1B1  | CASP9   | MATN1  | C1QL3     |
| GUCY1B2  | CASR    | MB     | C1QTNF1   |
| GUSB     | CAST    | MBL2   | C1QTNF12  |
| GZMK     | CAT     | MBTPS1 | C1QTNF3   |
| HAMP     | CAV1    | MCIDAS | C1QTNF5   |
| HBD      | CAV3    | MDK    | C1QTNF6   |
| HDAC4    | CAVIN4  | MEFV   | C1QTNF7   |
| HDAC5    | CBFA2T2 | MIF    | C3        |
| HDAC6    | CBS     | MLYCD  | C4A       |
| HDGF     | CBX1    | MMP1   | C4BPA     |
| HGF      | CBY1    | MMP12  | C5AR1     |
| HGS      | CCAR1   | MMP2   | C5AR2     |
| HIF1A    | CCDC60  | MMP3   | C5orf38   |
| HIF3A    | CCDC63  | MMP8   | C5orf56   |
| HMGB2    | CCDC88A | MMP9   | C6orf118  |
| HMGCR    | CCK     | MMRN1  | CA1       |
| HMOX1    | CCL11   | MMUT   | CA6       |
| HMOX2    | CCL16   | MOG    | CAAP1     |
| HPGDS    | CCL18   | MPG    | CABIN1    |
| HPS1     | CCL19   | MPI    | CACNA1C   |
| HRC      | CCL2    | MS4A1  | CACNA1D   |
| HRH2     | CCL20   | MSC    | CACNA1F   |
| HRH3     | CCL21   | MSN    | CACNA1S   |
| HSF1     | CCL22   | MTOR   | CACNB2    |
| HSP90AB1 | CCL27   | MYH6   | CADM1     |
| HSPA12B  | CCL28   | MYH7   | CADPS     |
| HSPA5    | CCL3    | MYL3   | CALCR     |
| HSPA8    | CCL4    | MYLK   | CALCRL    |
| HSPB1    | CCL5    | MYOM2  | CALD1     |
| HSPB2    | CCL7    | NCAM1  | CALR      |
| HSPB3    | CCN1    | NCR1   | CALU      |

|        |        |          |         |
|--------|--------|----------|---------|
| HSPB8  | CCN2   | NELFCD   | CAMKK2  |
| HSPD1  | CCN4   | NFAT5    | CAMP    |
| HTR1B  | CCNA2  | NGF      | CAMSAP3 |
| HTR2A  | CCND2  | NLRP3    | CAPN10  |
| HTR3A  | CCR1   | NMT1     | CAPN6   |
| HTRA2  | CCR2   | NOD2     | CARD10  |
| HYOU1  | CCR3   | NOS2     | CARD16  |
| ICAM1  | CCR4   | NOS3     | CARD8   |
| IFI44  | CCR5   | NPM1     | CARD9   |
| IFIT2  | CCR7   | NPPA     | CARHSP1 |
| IGF1   | CCR9   | NPPC     | CASC15  |
| IGF2   | CCS    | NR3C1    | CASP1   |
| IGFBP4 | CCT7   | NR3C2    | CASP3   |
| IKBKB  | CD14   | NTF4     | CASP5   |
| IL17A  | CD151  | OGN      | CASP8   |
| IL18   | CD163  | P2RX7    | CASP9   |
| IL18BP | CD180  | PCNA     | CASR    |
| IL1A   | CD19   | PDCD1    | CAST    |
| IL1B   | CD2    | PDCD4    | CAT     |
| IL33   | CD209  | PDGFC    | CAV1    |
| IL37   | CD27   | PDGFRA   | CAV2    |
| IL6    | CD274  | PDLIM7   | CAV3    |
| IL6ST  | CD28   | PI3      | CAVIN3  |
| ILF2   | CD34   | PIK3CG   | CBFA2T2 |
| ILK    | CD36   | PKP2     | CBL     |
| INS    | CD38   | PLA2G1B  | CBLIF   |
| IRAK1  | CD4    | PLP1     | CBLN1   |
| IRAK4  | CD40   | PNKD     | CBR1    |
| IRF9   | CD40LG | POR      | CBS     |
| ITGA2B | CD44   | POSTN    | CCAR1   |
| ITGAM  | CD47   | PPARA    | CCAR2   |
| ITGB2  | CD5    | PPARG    | CCDC57  |
| ITGB3  | CD55   | PPIA     | CCDC62  |
| ITLN1  | CD59   | PPP1R15A | CCDC7   |
| ITPR2  | CD5L   | PPP5C    | CCDC80  |
| JAK1   | CD6    | PRH1     | CCDC88B |
| JAK2   | CD63   | PRKCA    | CCK     |
| JUN    | CD68   | PRKCB    | CCL11   |
| KARS   | CD69   | PROM1    | CCL13   |
| KCNH2  | CD7    | PRSS2    | CCL15   |
| KCNMA1 | CD70   | PRYP4    | CCL16   |
| KCNQ1  | CD80   | PSMB8    | CCL17   |
| KDR    | CD86   | PSME1    | CCL18   |
| KIF2A  | CD93   | PSME2    | CCL19   |
| KITLG  | CD96   | PTEN     | CCL2    |
| KL     | CDA    | PTGS2    | CCL20   |
| KLF15  | CDC73  | PTPRC    | CCL21   |

|          |            |          |       |
|----------|------------|----------|-------|
| KLF5     | CDCA7L     | PVR      | CCL22 |
| KLK1     | CDCP1      | RAG1     | CCL23 |
| KLKB1    | CDH1       | RAPGEF5  | CCL24 |
| KRAS     | CDH12      | RBM38    | CCL25 |
| KRT1     | CDH13      | REN      | CCL26 |
| LCN2     | CDH2       | RHD      | CCL27 |
| LDHB     | CDH5       | RIPK1    | CCL28 |
| LEP      | CDK5RAP1   | RIPK3    | CCL3  |
| LGALS3   | CDK9       | RNASE3   | CCL4  |
| LIPC     | CDKAL1     | RNPC3    | CCL5  |
| LOX      | CDKN1A     | RPL17    | CCL7  |
| LPA      | CDKN1B     | RPTOR    | CCL8  |
| LPCAT3   | CDKN1C     | RYR2     | CCN1  |
| LPL      | CDKN2A     | S100A8   | CCN2  |
| LPO      | CDKN2B     | S100A9   | CCN3  |
| LRP1     | CDKN2B-AS1 | SARS     | CCN4  |
| LRP6     | CDS1       | SCARA3   | CCN5  |
| LTA      | CEACAM1    | SCD      | CCNA1 |
| LTB4R    | CEACAM5    | SELE     | CCNA2 |
| LY86     | CEACAM6    | SELL     | CCNG2 |
| MAEA     | CEBPB      | SEMA4A   | CCNT1 |
| MAMLD1   | CEBPZ      | SEMA7A   | CCR1  |
| MANF     | CELF1      | SERPINA5 | CCR2  |
| MAP2K1   | CELF4      | SERPINC1 | CCR3  |
| MAP2K3   | CELSR2     | SERPINE1 | CCR4  |
| MAP3K5   | CENPJ      | SGCD     | CCR5  |
| MAPK1    | CEPT1      | SLC17A5  | CCR6  |
| MAPK14   | CES1       | SLC25A10 | CCR7  |
| MAPK3    | CETP       | SLC25A4  | CCR8  |
| MAPK7    | CFB        | SLC33A1  | CCR9  |
| MAPK8    | CFD        | SLC7A11  | CCS   |
| MAPKAPK2 | CFH        | SMAD2    | CCT4  |
| MASP2    | CFI        | SMAD3    | CD14  |
| MAVS     | CFL1       | SOAT1    | CD151 |
| MB       | CFLAR      | SOCS1    | CD160 |
| MBL2     | CFP        | SOCS3    | CD163 |
| MBTPS1   | CFTR       | SORBS1   | CD180 |
| MC3R     | CGAS       | SPARC    | CD19  |
| MCAT     | CGN        | SPP1     | CD2   |
| MCF2L    | CHAT       | SPX      | CD209 |
| MEFV     | CHD1L      | SRSF2    | CD24  |
| MFN1     | CHGA       | SSB      | CD248 |
| MFN2     | CHGB       | SST      | CD27  |
| MICU1    | CHI3L1     | STAT1    | CD274 |
| MIF      | CHIC2      | STAT2    | CD276 |
| MLYCD    | CHP1       | STAT3    | CD28  |
| MMD      | CHRDL1     | STAT4    | CD34  |

|         |          |           |          |
|---------|----------|-----------|----------|
| MME     | CHRFAM7A | STAT6     | CD36     |
| MMP1    | CHRM2    | SULT1E1   | CD37     |
| MMP2    | CHRNA5   | TACR1     | CD38     |
| MMP3    | CHUK     | TACR3     | CD4      |
| MMP9    | CIART    | TBCA      | CD40     |
| MMRN1   | CIC      | TDP2      | CD40LG   |
| MPG     | CIITA    | TFPI      | CD44     |
| MPI     | CILP     | TGFB1     | CD47     |
| MRC1    | CITED4   | THBS1     | CD5      |
| MRRF    | CKB      | THBS2     | CD53     |
| MRTFA   | CKLF     | TICAM1    | CD55     |
| MSC     | CKM      | TIMP1     | CD58     |
| MSLN    | CKMT2    | TLR2      | CD59     |
| MSTN    | CLCN1    | TLR3      | CD5L     |
| MTHFR   | CLEC16A  | TLR4      | CD6      |
| MT-ND2  | CLEC3B   | TLR7      | CD63     |
| MTOR    | CLEC6A   | TLR9      | CD68     |
| MT-RNR2 | CLEC7A   | TMPRSS2   | CD69     |
| MVD     | CLK1     | TNC       | CD70     |
| MYC     | CLMN     | TNF       | CD74     |
| MYOCD   | CLSTN2   | TNFAIP3   | CD79A    |
| NAMPT   | CLU      | TNFRSF11B | CD80     |
| NCAM1   | CMA1     | TNFRSF14  | CD81     |
| NCL     | CMIP     | TNFRSF18  | CD86     |
| NDRG2   | CNP      | TNFRSF1A  | CD9      |
| NDRG4   | CNPY2    | TNFRSF1B  | CD93     |
| NES     | CNR1     | TNFRSF25  | CD99     |
| NF2     | CNR2     | TNFRSF8   | CD99L2   |
| NFAT5   | CNTF     | TNFSF11   | CDC27    |
| NFE2L2  | CNTN2    | TNFSF4    | CDC42    |
| NFKBIA  | CNTN4    | TNFSF8    | CDC42BPB |
| NGB     | COG2     | TNFSF9    | CDC42EP3 |
| NGF     | COMMD7   | TNNI3     | CDC6     |
| NKX2-5  | COPE     | TNNT2     | CDCA7L   |
| NLRP1   | CORIN    | TOR1A     | CDH1     |
| NLRP3   | CORO1A   | TRAF6     | CDH10    |
| NLRX1   | CORT     | TREX1     | CDH12    |
| NOC2L   | CPA1     | TRIM21    | CDH13    |
| NOD1    | CPB1     | TRIM63    | CDH5     |
| NOD2    | CPM      | TSPO      | CDIPT    |
| NOS1    | CPNE3    | TTN       | CDK1     |
| NOS2    | CPOX     | TTR       | CDK10    |
| NOS3    | CPSF4    | TXN       | CDK2     |
| NOTCH1  | CPT1B    | UCHL1     | CDK4     |
| NOTCH3  | CPT2     | VCAM1     | CDK5     |
| NOX1    | CR1      | VCL       | CDK9     |
| NOX4    | CREB3L1  | VDR       | CDKAL1   |

|        |        |         |            |
|--------|--------|---------|------------|
| NPPA   | CREG1  | VEGFA   | CDKL1      |
| NPPC   | CREM   | VIM     | CDKN1A     |
| NPR2   | CRH    | VIP     | CDKN1B     |
| NPY    | CRHR2  | XCL1    | CDKN1C     |
| NPY2R  | CRIP1  | XPR1    | CDKN2A     |
| NR1H2  | CRK    | ZBTB12  | CDKN2A-DT  |
| NR1H3  | CRLS1  | ZC3H12A | CDKN2B     |
| NR1H4  | CRP    | ZC3HAV1 | CDKN2B-AS1 |
| NR3C2  | CRX    |         | CDS1       |
| NTHL1  | CRY2   |         | CEACAM5    |
| NTN1   | CRYAB  |         | CEACAM6    |
| NTRK1  | CSAD   |         | CEBPA      |
| NTRK2  | CSF1   |         | CEBPB      |
| NTS    | CSF1R  |         | CEBPD      |
| NUCB2  | CSF2   |         | CEBPZ      |
| NUDT1  | CSF3   |         | CEL        |
| NUP43  | CSF3R  |         | CELA1      |
| OGA    | CSRP3  |         | CELSR1     |
| OGG1   | CST3   |         | CELSR2     |
| OLR1   | CTF1   |         | CENPC      |
| OPA1   | CTLA4  |         | CENPJ      |
| OPHN1  | CTNNB1 |         | CEP112     |
| OPN1LW | CTSA   |         | CEP152     |
| OPRM1  | CTSB   |         | CEP85L     |
| OSM    | CTSC   |         | CERK       |
| P2RX2  | CTSD   |         | CERS5      |
| P2RX3  | CTSK   |         | CES1       |
| P2RX4  | CTSL   |         | CETP       |
| P2RX7  | CTSS   |         | CFD        |
| P2RY11 | CUEDC2 |         | CFH        |
| P2RY12 | CUL7   |         | CFLAR      |
| PADI4  | CX3CL1 |         | CFP        |
| PAPPA  | CX3CR1 |         | CFTR       |
| PARK7  | CXADR  |         | CGNL1      |
| PARP1  | CXCL1  |         | CHAC1      |
| PBK    | CXCL10 |         | CHAF1A     |
| PBRM1  | CXCL16 |         | CHEK2      |
| PCBD1  | CXCL3  |         | CHGA       |
| PCSK5  | CXCL9  |         | CHI3L1     |
| PCSK7  | CXCR1  |         | CHI3L2     |
| PCYT1A | CXCR2  |         | CHIC1      |
| PDC    | CXCR3  |         | CHIC2      |
| PDE10A | CXCR4  |         | CHIT1      |
| PDE1A  | CXCR5  |         | CHKA       |
| PDE1B  | CYBA   |         | CHL1       |
| PDE1C  | CYBB   |         | CHM        |
| PDE2A  | CYCS   |         | CHP1       |



|         |         |  |          |
|---------|---------|--|----------|
| PDE3A   | CYP11B2 |  | CHRFAM7A |
| PDE3B   | CYP17A1 |  | CHRNA3   |
| PDE4A   | CYP19A1 |  | CHRNA5   |
| PDE4B   | CYP1A1  |  | CHRNB4   |
| PDE4C   | CYP1A2  |  | CHST11   |
| PDE4D   | CYP2C19 |  | CHST3    |
| PDE5A   | CYP2C8  |  | CHUK     |
| PDE6A   | CYP2C9  |  | CIART    |
| PDE6B   | CYP2D6  |  | CIC      |
| PDE6C   | CYP2J2  |  | CIDEC    |
| PDE6D   | CYP2R1  |  | CIITA    |
| PDE6G   | CYP3A4  |  | CISD1    |
| PDE6H   | CYP3A5  |  | CISH     |
| PDE7A   | CYP4A11 |  | CKLF     |
| PDE7B   | CYP4F2  |  | CLCF1    |
| PDE8A   | CYP7A1  |  | CLCN3    |
| PDE8B   | DAB2IP  |  | CLDN1    |
| PDE9A   | DAO     |  | CLEC16A  |
| PER2    | DAOA    |  | CLEC1B   |
| PF4     | DAP     |  | CLEC3B   |
| PGAM2   | DBH     |  | CLEC4C   |
| PGAM5   | DBI     |  | CLEC5A   |
| PGF     | DBT     |  | CLEC6A   |
| PGRMC1  | DCC     |  | CLEC7A   |
| PHLPP1  | DCD     |  | CLIC1    |
| PI3     | DCLK2   |  | CLIP1    |
| PIAS1   | DCN     |  | CLSTN2   |
| PICALM  | DCTD    |  | CLU      |
| PIK3CB  | DCTN3   |  | CMA1     |
| PIK3CD  | DDAH1   |  | CMIP     |
| PIK3CG  | DDAH2   |  | CMKLR1   |
| PKN1    | DDC     |  | CMTM8    |
| PLA2G10 | DDI1    |  | CNMD     |
| PLA2G1B | DDIT3   |  | CNN2     |
| PLA2G4A | DDR2    |  | CNNM1    |
| PLA2G7  | DDRKG1  |  | CNNM2    |
| PLD1    | DDX4    |  | CNOT4    |
| PLD6    | DDX41   |  | CNP      |
| PLEK    | DEFA1   |  | CNR1     |
| PLIN5   | DEGS1   |  | CNR2     |
| PNOC    | DENR    |  | CNTN3    |
| PNPLA2  | DES     |  | COG2     |
| PON1    | DFFA    |  | COG6     |
| POR     | DGCR2   |  | COL14A1  |
| POSTN   | DGKA    |  | COL15A1  |
| PPARA   | DGKB    |  | COL5A1   |
| PPARD   | DGKQ    |  | COLEC12  |

|          |        |  |            |
|----------|--------|--|------------|
| PPARG    | DGKZ   |  | COMMD1     |
| PPARGC1A | DGUOK  |  | COPS5      |
| PPIA     | DHFR   |  | CORIN      |
| PIIF     | DIAPH1 |  | CORT       |
| PRDX1    | DIPK2A |  | CPA1       |
| PRDX2    | DIS3L  |  | CPB1       |
| PRDX5    | DISC1  |  | CPD        |
| PRH1     | DKK1   |  | CPE        |
| PRKAA2   | DKK2   |  | CPEB2      |
| PRKCB    | DKK3   |  | CPN1       |
| PSEN1    | DLAT   |  | CPSF4      |
| PSMA2    | DLG1   |  | CPT1A      |
| PTAFR    | DMD    |  | CPT2       |
| PTEN     | DMRTA1 |  | CPVL       |
| PTGS1    | DNAH11 |  | CR1        |
| PTGS2    | DNAJC5 |  | CR2        |
| PTH      | DNASE1 |  | CRACR2A    |
| PTHLH    | DNM1L  |  | CREB3      |
| PTK2     | DNMT1  |  | CREB3L3    |
| PTN      | DNMT3A |  | CREG1      |
| PTPN1    | DNTT   |  | CRH        |
| PTPRC    | DOCK11 |  | CRHR1      |
| PVR      | DOT1L  |  | CRISP2     |
| PXDN     | DPEP1  |  | CRLF2      |
| RACK1    | DPP4   |  | CRP        |
| RAF1     | DPP6   |  | CRTC1      |
| RALA     | DPPA3  |  | CRY1       |
| RAMP2    | DPT    |  | CSAD       |
| RAPGEF3  | DPYS   |  | CSF1       |
| RARRES2  | DPYSL2 |  | CSF1R      |
| REN      | DRAM1  |  | CSF2       |
| RETN     | DRAM2  |  | CSF2RA     |
| RHEB     | DRD1   |  | CSF3       |
| RIPK1    | DRD2   |  | CSF3R      |
| RIPK3    | DSE    |  | CSGALNACT2 |
| RIPOR2   | DSG2   |  | CSHL1      |
| RIT1     | DSG3   |  | CSMD1      |
| RNF146   | DSP    |  | CSMD3      |
| RNH1     | DST    |  | CSN2       |
| RNLS     | DTNA   |  | CST3       |
| RRM1     | DTNB   |  | CSTB       |
| RTCA     | DUSP4  |  | CTCF       |
| RUNX1    | DVL1   |  | CTF1       |
| RYR2     | DYRK1A |  | CTH        |
| S100A1   | E2F1   |  | CTLA4      |
| S100A12  | E2F2   |  | CTNNB1     |
| S100A4   | E2F3   |  | CTNND2     |

|           |         |  |         |
|-----------|---------|--|---------|
| S100A6    | ECD     |  | CTSA    |
| S100A8    | ECHDC3  |  | CTSB    |
| S100B     | ECM1    |  | CTSC    |
| S1PR1     | EDA     |  | CTSD    |
| S1PR2     | EDC4    |  | CTSF    |
| S1PR3     | EDN1    |  | CTSH    |
| SAT1      | EDN2    |  | CTSK    |
| SCD       | EDN3    |  | CTSL    |
| SCG2      | EDNRA   |  | CTSS    |
| SCN4A     | EDNRB   |  | CTSV    |
| SELE      | EEF1A2  |  | CUBN    |
| SELENOP   | EEF2    |  | CUL3    |
| SELL      | EFNA1   |  | CUL5    |
| SELP      | EFNB2   |  | CWC22   |
| SELPLG    | EGF     |  | CX3CL1  |
| SENP3     | EGFR    |  | CX3CR1  |
| SERPINA1  | EGLN1   |  | CXCL1   |
| SERPINA12 | EGLN2   |  | CXCL10  |
| SERPINA4  | EGLN3   |  | CXCL11  |
| SERPINA5  | EGR1    |  | CXCL13  |
| SERPINC1  | EIF2S1  |  | CXCL14  |
| SERPINE1  | EIF4A3  |  | CXCL16  |
| SERPINF1  | ELANE   |  | CXCL2   |
| SERPINF2  | ELAVL1  |  | CXCL5   |
| SERPING1  | ELOVL5  |  | CXCL9   |
| SESN2     | EMC10   |  | CXCR1   |
| SETD2     | EMD     |  | CXCR2   |
| SETD7     | EMILIN1 |  | CXCR3   |
| SGK1      | EMP1    |  | CXCR4   |
| SH3BP4    | ENG     |  | CXCR5   |
| SHD       | ENHO    |  | CXCR6   |
| SIRT1     | ENO2    |  | CYBA    |
| SIRT2     | ENO3    |  | CYBB    |
| SIRT3     | ENPEP   |  | CYCS    |
| SIRT5     | ENPP1   |  | CYGB    |
| SIRT6     | ENTPD1  |  | CYLD    |
| SKIL      | EPCAM   |  | CYP11B2 |
| SLC17A5   | EPHA1   |  | CYP17A1 |
| SLC22A12  | EPHA2   |  | CYP19A1 |
| SLC22A4   | EPHA4   |  | CYP1A1  |
| SLC25A1   | EPHB2   |  | CYP1A2  |
| SLC25A3   | EPHB4   |  | CYP1B1  |
| SLC29A1   | EPHX1   |  | CYP21A2 |
| SLC2A1    | EPHX2   |  | CYP26A1 |
| SLC2A4    | EPO     |  | CYP26B1 |
| SLC33A1   | EPOR    |  | CYP27A1 |
| SLC5A5    | EPRS    |  | CYP27B1 |

|         |         |  |          |
|---------|---------|--|----------|
| SLC6A2  | EPX     |  | CYP2C19  |
| SLC6A4  | ERAL1   |  | CYP2C8   |
| SLC9A1  | ERAS    |  | CYP2C9   |
| SLCO6A1 | ERBB2   |  | CYP2J2   |
| SLN     | ERBB3   |  | CYP3A4   |
| SLPI    | ERBB4   |  | CYP3A5   |
| SMAD2   | ERCC8   |  | CYP7A1   |
| SMAD3   | ERFE    |  | DAB2IP   |
| SMAD4   | ESD     |  | DAPK3    |
| SMAD7   | ESM1    |  | DBI      |
| SMC2    | ESR1    |  | DBN1     |
| SMPD1   | ESR2    |  | DBT      |
| SOAT1   | ETV2    |  | DCC      |
| SOCS3   | ETV3    |  | DCD      |
| SOX7    | ETV6    |  | DCLRE1C  |
| SP4     | EVC     |  | DCN      |
| SPARC   | EVPL    |  | DCP1B    |
| SPHK1   | EXOSC10 |  | DCSTAMP  |
| SPP1    | EXOSC4  |  | DCTN3    |
| SPRR3   | EZH1    |  | DDAH1    |
| SRC     | EZH2    |  | DDAH2    |
| SRY     | F11R    |  | DDC      |
| SSB     | F13A1   |  | DDIT3    |
| SST     | F2R     |  | DDR1     |
| ST13    | F2RL1   |  | DDR2     |
| ST3GAL4 | F3      |  | DDX41    |
| ST8SIA4 | F5      |  | DDX58    |
| STAT1   | F7      |  | DEFA1    |
| STAT3   | F8      |  | DEFB103B |
| STAT5A  | FAAH    |  | DEFB4B   |
| STAT6   | FABP1   |  | DENR     |
| STC1    | FABP2   |  | DES      |
| STEAP4  | FABP3   |  | DFFA     |
| STH     | FABP4   |  | DFFB     |
| STIL    | FADD    |  | DGAT1    |
| STIM1   | FADS1   |  | DGKD     |
| STK11   | FADS2   |  | DHCR24   |
| STOM    | FAIM    |  | DHCR7    |
| STOML2  | FAIM2   |  | DHFR     |
| STS     | FAM111B |  | DHRS2    |
| SUCNR1  | FANCC   |  | DHX58    |
| SULT1A3 | FAP     |  | DIRAS3   |
| SULT1E1 | FARP2   |  | DISC1    |
| SULT2A1 | FARS2   |  | DKK1     |
| SULT4A1 | FASLG   |  | DKK3     |
| SYNE1   | FBLN1   |  | DLAT     |
| SYT1    | FBLN2   |  | DLEU7    |

|           |        |  |        |
|-----------|--------|--|--------|
| TAB1      | FBLN5  |  | DLGAP2 |
| TACR1     | FBN1   |  | DLK1   |
| TAGLN     | FBXL4  |  | DLL4   |
| TBCD      | FBXO32 |  | DMD    |
| TBXA2R    | FCAR   |  | DMTN   |
| TCF21     | FCGR1A |  | DNAJC5 |
| TCHP      | FCGR2A |  | DNASE1 |
| TCP1      | FCGR2B |  | DNM1   |
| TET1      | FCGR3A |  | DNM2   |
| TF        | FCGR3B |  | DNMT1  |
| TFAM      | FCN1   |  | DOCK3  |
| TFEB      | FCN2   |  | DOCK4  |
| TFF3      | FDFT1  |  | DOCK7  |
| TFPI      | FES    |  | DOCK9  |
| TGFB1     | FEV    |  | DPEP1  |
| TGFB3     | FGF1   |  | DPP4   |
| THRA      | FGF18  |  | DPP6   |
| THRB      | FGF2   |  | DPP8   |
| TICAM1    | FGF21  |  | DPP9   |
| TIMP1     | FGF23  |  | DRD2   |
| TIMP2     | FGFR1  |  | DSC1   |
| TJP1      | FGFR2  |  | DSE    |
| TLR2      | FGG    |  | DSG1   |
| TLR3      | FHL2   |  | DST    |
| TLR4      | FKBP1A |  | DSTN   |
| TLR9      | FKBP1B |  | DUSP1  |
| TLX1NB    | FKBP5  |  | DUSP10 |
| TLX2      | FLII   |  | DUSP14 |
| TMEFF2    | FLNA   |  | DUSP16 |
| TMSB4X    | FLNC   |  | DUSP5  |
| TNC       | FLOT2  |  | DYRK1A |
| TNF       | FLRT2  |  | E2F1   |
| TNFAIP8L2 | FLT1   |  | EBF1   |
| TNFRSF11B | FLT3   |  | EBI3   |
| TNFRSF1A  | FLT4   |  | ECD    |
| TNFRSF1B  | FMN1   |  | ECE2   |
| TNNI3     | FN1    |  | ECSCR  |
| TNNI3K    | FNDC5  |  | EDA    |
| TNNT1     | FOS    |  | EDAR   |
| TNNT2     | FOXE1  |  | EDN1   |
| TNS1      | FOXG1  |  | EDN2   |
| TNS3      | FOXH1  |  | EDN3   |
| TP53      | FOXL1  |  | EDNRA  |
| TP53INP2  | FOXO1  |  | EDNRB  |
| TPO       | FOXP3  |  | EEF2K  |
| TPR       | FPR1   |  | EFHC1  |
| TPT1      | FRZB   |  | EFNA1  |

|         |        |  |          |
|---------|--------|--|----------|
| TRIM63  | FSTL1  |  | EFNA5    |
| TRPA1   | FTO    |  | EFNB1    |
| TRPC1   | FURIN  |  | EFNB2    |
| TRPM4   | FXYD1  |  | EGF      |
| TRPM6   | FZD1   |  | EGFR     |
| TRPM7   | FZD2   |  | EGLN1    |
| TRPV1   | G6PD   |  | EGLN2    |
| TRPV4   | GABRA1 |  | EGLN3    |
| TSPO    | GABRA2 |  | EGR1     |
| TTN     | GABRA3 |  | EHF      |
| TTR     | GABRA4 |  | EHHADH   |
| TWSG1   | GABRA5 |  | EIF2AK1  |
| TXN     | GABRA6 |  | EIF2AK2  |
| TXN2    | GABRB1 |  | EIF2S1   |
| TXNIP   | GABRB2 |  | EIF4E    |
| TXNL1   | GABRB3 |  | ELANE    |
| TYMP    | GABRD  |  | ELAVL1   |
| UBQLN1  | GABRE  |  | ELMO1    |
| UBR5    | GABRG1 |  | EMD      |
| UCN     | GABRG2 |  | EMP1     |
| UCN3    | GABRG3 |  | ENG      |
| UCP2    | GABRP  |  | ENHO     |
| UCP3    | GABRQ  |  | ENO2     |
| ULK1    | GAD1   |  | ENPEP    |
| UNC5B   | GAK    |  | ENPP1    |
| VASP    | GAP43  |  | ENPP2    |
| VCAM1   | GAPDH  |  | ENPP7    |
| VCL     | GAS6   |  | ENTPD1   |
| VCP     | GAST   |  | EPAS1    |
| VDAC1   | GATA3  |  | EPB41L4B |
| VDR     | GATA4  |  | EPC2     |
| VEGFA   | GBA    |  | EPDR1    |
| VEGFB   | GCFC2  |  | EPHA1    |
| VEGFC   | GCGR   |  | EPHA3    |
| VIM     | GCH1   |  | EPHB1    |
| VIP     | GCKR   |  | EPHB2    |
| VKORC1  | GCLC   |  | EPHX2    |
| VPS51   | GCLM   |  | EPN1     |
| VWF     | GDA    |  | EPO      |
| WDR26   | GDF1   |  | ERBB2    |
| WT1     | GDF10  |  | ERC2     |
| XBP1    | GDF11  |  | ERCC1    |
| XPR1    | GDF15  |  | ERCC2    |
| YES1    | GFAP   |  | ERCC8    |
| ZC3H12A | GFOD2  |  | EREG     |
| ZGLP1   | GFPT1  |  | ERICH1   |
|         | GFPT2  |  | ERN1     |

|  |        |  |         |
|--|--------|--|---------|
|  | GH1    |  | ERN2    |
|  | GHRH   |  | ESAM    |
|  | GHRHR  |  | ESM1    |
|  | GHRL   |  | ESR1    |
|  | GHSR   |  | ESR2    |
|  | GIP    |  | ESRRA   |
|  | GIPR   |  | ETV3    |
|  | GJA1   |  | EVPL    |
|  | GJA4   |  | EXTL2   |
|  | GJA5   |  | EZH2    |
|  | GJB1   |  | EZR     |
|  | GJC1   |  | F11R    |
|  | GJD2   |  | F13A1   |
|  | GLA    |  | F2R     |
|  | GLB1   |  | F2RL1   |
|  | GLI1   |  | F3      |
|  | GLP1R  |  | F5      |
|  | GLRA1  |  | F7      |
|  | GLRA2  |  | F8      |
|  | GLRX   |  | FA2H    |
|  | GLUL   |  | FABP1   |
|  | GNB3   |  | FABP2   |
|  | GPLY   |  | FABP3   |
|  | GNRH1  |  | FABP4   |
|  | GOPC   |  | FABP5   |
|  | GOSR2  |  | FADD    |
|  | GOT2   |  | FADS1   |
|  | GP1BA  |  | FADS2   |
|  | GP5    |  | FADS3   |
|  | GP6    |  | FAM168B |
|  | GPOR1  |  | FAM174A |
|  | GPI    |  | FAM49A  |
|  | GPKOW  |  | FANCC   |
|  | GPNMB  |  | FASLG   |
|  | GPR132 |  | FASN    |
|  | GPR17  |  | FBLN1   |
|  | GPR180 |  | FBLN2   |
|  | GPR35  |  | FBLN5   |
|  | GPR4   |  | FBN1    |
|  | GPR65  |  | FBP2    |
|  | GPX1   |  | FBXO3   |
|  | GPX3   |  | FCAR    |
|  | GRAP2  |  | FCGR1A  |
|  | GREM2  |  | FCGR2A  |
|  | GRIN2B |  | FCGR2B  |
|  | GRK2   |  | FCGR3A  |
|  | GRK4   |  | FCN2    |

|  |         |  |        |
|--|---------|--|--------|
|  | GRK5    |  | FDFT1  |
|  | GRK6    |  | FDPS   |
|  | GRN     |  | FDX1   |
|  | GSC     |  | FEV    |
|  | GSDMD   |  | FEZ1   |
|  | GSK3A   |  | FFAR4  |
|  | GSK3B   |  | FGF1   |
|  | GSR     |  | FGF12  |
|  | GSTA1   |  | FGF19  |
|  | GSTCD   |  | FGF2   |
|  | GSTM1   |  | FGF21  |
|  | GSTP1   |  | FGF23  |
|  | GUCY1A1 |  | FGFBP1 |
|  | GUCY1B1 |  | FGFR1  |
|  | GUCY1B2 |  | FGFR2  |
|  | GUSB    |  | FGFR4  |
|  | GYG1    |  | FGG    |
|  | GYS1    |  | FHIT   |
|  | GZMB    |  | FHL1   |
|  | H2AFX   |  | FHL2   |
|  | HABP2   |  | FLCN   |
|  | HAMP    |  | FLNA   |
|  | HARS    |  | FLOT2  |
|  | HAS3    |  | FLT1   |
|  | HAVCR1  |  | FLT4   |
|  | HBD     |  | FMO3   |
|  | HBEGF   |  | FMOD   |
|  | HCAR2   |  | FN1    |
|  | HCN2    |  | FOLR1  |
|  | HCN4    |  | FOLR2  |
|  | HCRT    |  | FOS    |
|  | HDAC4   |  | FOSL1  |
|  | HDAC5   |  | FOXO1  |
|  | HDAC6   |  | FOXO3  |
|  | HDAC9   |  | FOXO6  |
|  | HDGF    |  | FOXP1  |
|  | HEMGN   |  | FOXP3  |
|  | HFE     |  | FPR1   |
|  | HGF     |  | FPR2   |
|  | HGS     |  | FPR3   |
|  | HHIPL1  |  | FRMD4A |
|  | HIF1A   |  | FRMD6  |
|  | HIGD1A  |  | FTL    |
|  | HIP1    |  | FTO    |
|  | HK1     |  | FURIN  |
|  | HK2     |  | FUS    |
|  | HLA-DMA |  | FUT4   |



|  |          |  |         |
|--|----------|--|---------|
|  | HLA-DQB1 |  | FUT7    |
|  | HLA-DRA  |  | FXVD1   |
|  | HM13     |  | FYN     |
|  | HMBS     |  | G0S2    |
|  | HMCN1    |  | G3BP1   |
|  | HMGA1    |  | G6PC2   |
|  | HMGB2    |  | G6PD    |
|  | HMGCR    |  | GABRA1  |
|  | HMMR     |  | GABRA2  |
|  | HMOX1    |  | GABRA3  |
|  | HNF1A    |  | GABRA5  |
|  | HNF1B    |  | GABRG1  |
|  | HNRNP    |  | GABRG2  |
|  | HNRNPUL1 |  | GABRG3  |
|  | HPGDS    |  | GABRR3  |
|  | HPR      |  | GAD1    |
|  | HPS1     |  | GADD45A |
|  | HPSE     |  | GALNT3  |
|  | HPX      |  | GALNT4  |
|  | HRC      |  | GAPDH   |
|  | HRH3     |  | GAS6    |
|  | HSD11B1  |  | GATA1   |
|  | HSF1     |  | GATA2   |
|  | HSP90AB1 |  | GATA4   |
|  | HSP90B1  |  | GATA6   |
|  | HSPA12B  |  | GBP6    |
|  | HSPA1A   |  | GCGR    |
|  | HSPA5    |  | GCH1    |
|  | HSPA8    |  | GCK     |
|  | HSPB1    |  | GCKR    |
|  | HSPB3    |  | GCLC    |
|  | HSPB7    |  | GCLM    |
|  | HSPB8    |  | GDF10   |
|  | HSPD1    |  | GDF11   |
|  | HTR1B    |  | GDF15   |
|  | HTR1D    |  | GDF2    |
|  | HTR2A    |  | GDF6    |
|  | HTR3A    |  | GEM     |
|  | HTR4     |  | GET4    |
|  | HTRA2    |  | GH1     |
|  | HUNK     |  | GHR     |
|  | HYOU1    |  | GHRHR   |
|  | IARS     |  | GHRL    |
|  | ICAM1    |  | GHSR    |
|  | ICAM3    |  | GIP     |
|  | ICOS     |  | GIPR    |
|  | IDO1     |  | GJA1    |

|  |        |  |         |
|--|--------|--|---------|
|  | IFIT1  |  | GJA3    |
|  | IFNB1  |  | GJA4    |
|  | IFNGR1 |  | GJA5    |
|  | IFNGR2 |  | GJB1    |
|  | IFNL1  |  | GJB5    |
|  | IFNLR1 |  | GJC2    |
|  | IGF1   |  | GLA     |
|  | IGF1R  |  | GLB1    |
|  | IGF2   |  | GLG1    |
|  | IGF2R  |  | GLIS3   |
|  | IGFBP1 |  | GLO1    |
|  | IGFBP3 |  | GLP1R   |
|  | IGFBP4 |  | GLRX3   |
|  | IGFBP7 |  | GLYATL3 |
|  | IGHM   |  | GMNN    |
|  | IK     |  | GNA11   |
|  | IKBKB  |  | GNA12   |
|  | IL10RA |  | GNA13   |
|  | IL11   |  | GNB3    |
|  | IL12B  |  | GNMT    |
|  | IL13   |  | GNRHR   |
|  | IL15   |  | GOSR2   |
|  | IL17A  |  | GOT1    |
|  | IL17D  |  | GOT2    |
|  | IL17F  |  | GP1BA   |
|  | IL18   |  | GP5     |
|  | IL18BP |  | GP6     |
|  | IL19   |  | GPBAR1  |
|  | IL1A   |  | GPBP1   |
|  | IL1B   |  | GPC1    |
|  | IL1F10 |  | GPC5    |
|  | IL1R1  |  | GPD2    |
|  | IL1RAP |  | GPER1   |
|  | IL1RL1 |  | GPI     |
|  | IL1RN  |  | GPIHBP1 |
|  | IL22   |  | GPKOW   |
|  | IL23R  |  | GPLD1   |
|  | IL26   |  | GPR119  |
|  | IL27   |  | GPR132  |
|  | IL2RA  |  | GPR137C |
|  | IL2RB  |  | GPR35   |
|  | IL32   |  | GPR55   |
|  | IL33   |  | GPR6    |
|  | IL37   |  | GPR84   |
|  | IL4I1  |  | GPS2    |
|  | IL6    |  | GPX1    |
|  | IL6R   |  | GPX3    |

|  |          |  |         |
|--|----------|--|---------|
|  | IL6ST    |  | GPX4    |
|  | IL9      |  | GRAP2   |
|  | ILF3     |  | GREM1   |
|  | ILK      |  | GRIN1   |
|  | ILKAP    |  | GRIN2A  |
|  | IMMT     |  | GRIN2B  |
|  | INPP5D   |  | GRIN2C  |
|  | INPP5K   |  | GRIN2D  |
|  | INS      |  | GRIN3A  |
|  | INSIG2   |  | GRIN3B  |
|  | INSRR    |  | GRK2    |
|  | IRAK1    |  | GRK5    |
|  | IRAK3    |  | GRM3    |
|  | IRAK4    |  | GRN     |
|  | IRF3     |  | GSC     |
|  | IRF5     |  | GSK3A   |
|  | IRF6     |  | GSK3B   |
|  | IRF8     |  | GSR     |
|  | IRF9     |  | GSS     |
|  | IRS1     |  | GSTA4   |
|  | IRX1     |  | GSTM1   |
|  | ISL1     |  | GSTO1   |
|  | ITCH     |  | GTPBP1  |
|  | ITGA2    |  | GUCY1A1 |
|  | ITGA2B   |  | GUK1    |
|  | ITGA5    |  | GUSB    |
|  | ITGA6    |  | GYPA    |
|  | ITGB1    |  | GYPC    |
|  | ITGB1BP2 |  | GYPE    |
|  | ITGB2    |  | GZMB    |
|  | ITGB3    |  | H6PD    |
|  | ITIH4    |  | HABP2   |
|  | ITLN1    |  | HACD4   |
|  | ITPRID2  |  | HAL     |
|  | IVD      |  | HAMP    |
|  | IVL      |  | HAS2    |
|  | IVNS1ABP |  | HAS3    |
|  | JAG1     |  | HAVCR1  |
|  | JAK2     |  | HBEGF   |
|  | JCAD     |  | HCAR2   |
|  | JDP2     |  | HCRT    |
|  | JMJD1C   |  | HDAC1   |
|  | JPH2     |  | HDAC2   |
|  | JUN      |  | HDAC3   |
|  | JUP      |  | HDAC4   |
|  | KAT8     |  | HDAC5   |
|  | KBTBD7   |  | HDAC6   |

|  |          |  |           |
|--|----------|--|-----------|
|  | KCNE1    |  | HDAC9     |
|  | KCNE2    |  | HDC       |
|  | KCNE4    |  | HDLBP     |
|  | KCNH2    |  | HECA      |
|  | KCNJ11   |  | HFE       |
|  | KCNK10   |  | HGF       |
|  | KCNK18   |  | HGFAC     |
|  | KCNK2    |  | HGS       |
|  | KCNK3    |  | HHEX      |
|  | KCNK9    |  | HHIP      |
|  | KCNMA1   |  | HHIPL1    |
|  | KCNN4    |  | HIF1A     |
|  | KCNQ1    |  | HILPDA    |
|  | KCTD2    |  | HIST1H2BJ |
|  | KDM1A    |  | HIST1H4L  |
|  | KDM5D    |  | HIVEP2    |
|  | KDR      |  | HLA-A     |
|  | KIAA1217 |  | HLA-C     |
|  | KIF3A    |  | HLA-DMB   |
|  | KIF6     |  | HLA-DOA   |
|  | KIR3DL3  |  | HLA-DQA2  |
|  | KITLG    |  | HLA-DQB1  |
|  | KL       |  | HLA-DRA   |
|  | KLF10    |  | HLA-DRB1  |
|  | KLF2     |  | HM13      |
|  | KLF4     |  | HMBOX1    |
|  | KLK1     |  | HMBS      |
|  | KLK3     |  | HMG20A    |
|  | KLK6     |  | HMGA1     |
|  | KLKB1    |  | HMGA2     |
|  | KLRB1    |  | HMGCR     |
|  | KLRC1    |  | HMGXB3    |
|  | KLRD1    |  | HMOX1     |
|  | KLRG1    |  | HMOX2     |
|  | KLRK1    |  | HNF1A     |
|  | KMT2A    |  | HNF1B     |
|  | KNG1     |  | HNF4A     |
|  | KRT1     |  | HNRNPD    |
|  | KRT10    |  | HNRNPK    |
|  | KRT14    |  | HOXA10    |
|  | KRT18    |  | HOXA11    |
|  | KRT25    |  | HOXA6     |
|  | KRT28    |  | HOXA9     |
|  | KRT3     |  | HOXC11    |
|  | KRT74    |  | HOXC4     |
|  | KRT75    |  | HOXC5     |
|  | KRT76    |  | HOXD4     |

|  |          |  |          |
|--|----------|--|----------|
|  | KRT77    |  | HPCAL1   |
|  | KRT85    |  | HPD      |
|  | KRT86    |  | HPGD     |
|  | KRTAP1-1 |  | HPGDS    |
|  | LAG3     |  | HPN      |
|  | LAIR1    |  | HPR      |
|  | LAP3     |  | HPS1     |
|  | LARP6    |  | HPS3     |
|  | LAT      |  | HPSE     |
|  | LAX1     |  | HPX      |
|  | LBP      |  | HRAS     |
|  | LCAT     |  | HRH1     |
|  | LCK      |  | HRH2     |
|  | LCN2     |  | HS3ST1   |
|  | LCT      |  | HSD11B1  |
|  | LDHA     |  | HSD11B2  |
|  | LDHB     |  | HSD17B6  |
|  | LEP      |  | HSF1     |
|  | LEPR     |  | HSH2D    |
|  | LGALS1   |  | HSP90AB1 |
|  | LGALS2   |  | HSP90B1  |
|  | LGALS3   |  | HSPA12B  |
|  | LGALS3BP |  | HSPA1A   |
|  | LHFPL2   |  | HSPA1B   |
|  | LIF      |  | HSPA5    |
|  | LIMD1    |  | HSPA8    |
|  | LIMS1    |  | HSPB1    |
|  | LIMS2    |  | HSPB3    |
|  | LIPA     |  | HSPB8    |
|  | LIPC     |  | HSPD1    |
|  | LIPE     |  | HTR1B    |
|  | LIPG     |  | HTR2A    |
|  | LMCD1    |  | HTR4     |
|  | LMNA     |  | HTR5A    |
|  | LOX      |  | HTRA2    |
|  | LPA      |  | HYLS1    |
|  | LPAL2    |  | HYOU1    |
|  | LPAR3    |  | IAPP     |
|  | LPL      |  | IARS     |
|  | LPO      |  | IBSP     |
|  | LPP      |  | ICAM1    |
|  | LPXN     |  | ICOS     |
|  | LRG1     |  | ICOSLG   |
|  | LRP1     |  | ID3      |
|  | LRP2     |  | IDE      |
|  | LRP5     |  | IDH2     |
|  | LRP6     |  | IDO1     |

|  |          |  |         |
|--|----------|--|---------|
|  | LRP8     |  | IDS     |
|  | LRRC3B   |  | IFI16   |
|  | LRRFIP1  |  | IFI30   |
|  | LRRK2    |  | IFI44   |
|  | LTA      |  | IFIH1   |
|  | LTA4H    |  | IFNA2   |
|  | LTB      |  | IFNAR1  |
|  | LTC4S    |  | IFNB1   |
|  | LTF      |  | IFNGR2  |
|  | LXN      |  | IFT122  |
|  | LYST     |  | IGF1    |
|  | LYVE1    |  | IGF1R   |
|  | MAEA     |  | IGF2    |
|  | MAF      |  | IGF2BP2 |
|  | MAG      |  | IGF2R   |
|  | MALT1    |  | IGFBP1  |
|  | MAMLD1   |  | IGFBP2  |
|  | MANF     |  | IGFBP3  |
|  | MANSC1   |  | IGFBP4  |
|  | MAP2K1   |  | IGFBP5  |
|  | MAP2K3   |  | IGFBP7  |
|  | MAP2K5   |  | IGHD    |
|  | MAP2K6   |  | IGLL1   |
|  | MAP3K3   |  | IKBKB   |
|  | MAP3K5   |  | IKBKE   |
|  | MAP4     |  | IKBKG   |
|  | MAP4K5   |  | IKZF2   |
|  | MAP6     |  | IL10RB  |
|  | MAP9     |  | IL11    |
|  | MAPK3    |  | IL12A   |
|  | MAPK7    |  | IL13    |
|  | MAPK8    |  | IL15    |
|  | MAPKAPK2 |  | IL15RA  |
|  | MAPKAPK3 |  | IL16    |
|  | MAPKAPK5 |  | IL17A   |
|  | MARCKS   |  | IL17C   |
|  | MARS     |  | IL17D   |
|  | MASP1    |  | IL17F   |
|  | MASP2    |  | IL17RA  |
|  | MAT2A    |  | IL17RB  |
|  | MAT2B    |  | IL18    |
|  | MATK     |  | IL18BP  |
|  | MATN1    |  | IL19    |
|  | MAZ      |  | IL1A    |
|  | MB       |  | IL1B    |
|  | MBL2     |  | IL1F10  |
|  | MBNL1    |  | IL1R1   |

|  |         |  |         |
|--|---------|--|---------|
|  | MBTPS1  |  | IL1R2   |
|  | MC4R    |  | IL1RL1  |
|  | MCAT    |  | IL1RN   |
|  | MCF2L   |  | IL21    |
|  | MCHR2   |  | IL21R   |
|  | MCIDAS  |  | IL22    |
|  | MCU     |  | IL23A   |
|  | MDFIC   |  | IL23R   |
|  | MDK     |  | IL24    |
|  | MDM2    |  | IL25    |
|  | MED23   |  | IL26    |
|  | MEF2A   |  | IL2RB   |
|  | MEFV    |  | IL2RG   |
|  | MEN1    |  | IL31RA  |
|  | MERTK   |  | IL32    |
|  | MEX3B   |  | IL33    |
|  | MFAP4   |  | IL34    |
|  | MFF     |  | IL37    |
|  | MFGE8   |  | IL4R    |
|  | MGP     |  | IL6     |
|  | MIA     |  | IL6R    |
|  | MIA3    |  | IL6ST   |
|  | MICA    |  | IL7R    |
|  | MIF     |  | IL9     |
|  | MLANA   |  | ILK     |
|  | MLKL    |  | ILKAP   |
|  | MLN     |  | IMPA2   |
|  | MLXIPL  |  | INF2    |
|  | MLYCD   |  | INO80D  |
|  | MMD     |  | INPP5K  |
|  | MME     |  | INPPL1  |
|  | MMP1    |  | INS     |
|  | MMP10   |  | INSIG1  |
|  | MMP12   |  | INSIG2  |
|  | MMP13   |  | INTS6   |
|  | MMP19   |  | INVS    |
|  | MMP2    |  | IPO5    |
|  | MMP20   |  | IQSEC1  |
|  | MMP28   |  | IRAK1   |
|  | MMP3    |  | IRAK3   |
|  | MMP7    |  | IRAK4   |
|  | MMP8    |  | IRF1    |
|  | MMP9    |  | IRF2BP2 |
|  | MMRN1   |  | IRF3    |
|  | MMUT    |  | IRF5    |
|  | MORF4L1 |  | IRF7    |
|  | MPG     |  | IRF8    |

|  |         |  |        |
|--|---------|--|--------|
|  | MPI     |  | IRGM   |
|  | MRAP    |  | IRS1   |
|  | MRAS    |  | IRS2   |
|  | MRC1    |  | IRX4   |
|  | MRPS6   |  | ISOC1  |
|  | MRRF    |  | ITCH   |
|  | MRS2    |  | ITGA2  |
|  | MRTFA   |  | ITGA2B |
|  | MSC     |  | ITGA4  |
|  | MST1    |  | ITGA5  |
|  | MSTN    |  | ITGA6  |
|  | MTAP    |  | ITGA8  |
|  | MT-CO1  |  | ITGAD  |
|  | MT-CYB  |  | ITGAL  |
|  | MTHFD1  |  | ITGAM  |
|  | MTHFR   |  | ITGAX  |
|  | MT-ND2  |  | ITGB2  |
|  | MTNR1A  |  | ITGB3  |
|  | MTOR    |  | ITGB4  |
|  | MTR     |  | ITGB5  |
|  | MT-RNR2 |  | ITGB7  |
|  | MTRR    |  | ITIH4  |
|  | MTSS1   |  | ITLN1  |
|  | MTTP    |  | ITPR2  |
|  | MTX1    |  | IVD    |
|  | MUC1    |  | JAG1   |
|  | MUC16   |  | JAK1   |
|  | MUC5AC  |  | JAK2   |
|  | MVD     |  | JAK3   |
|  | MVP     |  | JAM3   |
|  | MXD1    |  | JAML   |
|  | MYBL2   |  | JAZF1  |
|  | MYBPC3  |  | JCAD   |
|  | MYBPHL  |  | JMJD1C |
|  | MYD88   |  | JUN    |
|  | MYDGF   |  | JUP    |
|  | MYEOV   |  | KALRN  |
|  | MYH10   |  | KAT8   |
|  | MYH7    |  | KCNC4  |
|  | MYL2    |  | KCNE2  |
|  | MYL3    |  | KCNJ11 |
|  | MYL7    |  | KCNJ3  |
|  | MYOCD   |  | KCNMA1 |
|  | MYOG    |  | KCNMB1 |
|  | MYOZ2   |  | KCNN3  |
|  | MYRF    |  | KCNN4  |
|  | NAAA    |  | KCNQ1  |



|  |         |  |          |
|--|---------|--|----------|
|  | NAB1    |  | KCTD15   |
|  | NAMPT   |  | KCTD2    |
|  | NANOS1  |  | KDM4A    |
|  | NANOS3  |  | KDM5B    |
|  | NAP1L4  |  | KDM5D    |
|  | NBEAL1  |  | KDR      |
|  | NBN     |  | KERA     |
|  | NCAM1   |  | KIF20B   |
|  | NCF1    |  | KIF6     |
|  | NCR3    |  | KIRREL3  |
|  | NDNF    |  | KISS1    |
|  | NDP     |  | KISS1R   |
|  | NDRG1   |  | KITLG    |
|  | NDUFS4  |  | KL       |
|  | NEB     |  | KLF10    |
|  | NECTIN3 |  | KLF15    |
|  | NEDD4L  |  | KLF2     |
|  | NEIL3   |  | KLF4     |
|  | NELFCD  |  | KLF5     |
|  | NES     |  | KLHDC3   |
|  | NEU1    |  | KLHDC8B  |
|  | NF1     |  | KLK1     |
|  | NF2     |  | KLK3     |
|  | NFATC3  |  | KLKB1    |
|  | NFE2L2  |  | KLRC2    |
|  | NFKB1   |  | KLRD1    |
|  | NFKBIA  |  | KLRG1    |
|  | NFKBIB  |  | KLRK1    |
|  | NFKBIL1 |  | KMT2E    |
|  | NGB     |  | KRT14    |
|  | NGF     |  | KRT18P32 |
|  | NIBAN2  |  | KRT27    |
|  | NINL    |  | KRT8     |
|  | NISCH   |  | LACTB    |
|  | NKX2-5  |  | LAG3     |
|  | NLRP2   |  | LAIR1    |
|  | NLRP3   |  | LBH      |
|  | NMI     |  | LBP      |
|  | NMS     |  | LCAT     |
|  | NNT     |  | LCN2     |
|  | NOC2L   |  | LCP1     |
|  | NOD1    |  | LDB2     |
|  | NOD2    |  | LDHA     |
|  | NOS1    |  | LECT2    |
|  | NOS1AP  |  | LEF1     |
|  | NOS2    |  | LEP      |
|  | NOS3    |  | LEPR     |

|  |        |  |           |
|--|--------|--|-----------|
|  | NOTCH1 |  | LGALS1    |
|  | NOTCH3 |  | LGALS3    |
|  | NOX4   |  | LGALS3BP  |
|  | NOX5   |  | LGI1      |
|  | NPAT   |  | LGMN      |
|  | NPC1L1 |  | LIAS      |
|  | NPFF   |  | LIF       |
|  | NPPA   |  | LILRB1    |
|  | NPPB   |  | LILRB4    |
|  | NPPC   |  | LIN9      |
|  | NPR1   |  | LINC00305 |
|  | NPR2   |  | LINGO1    |
|  | NPR3   |  | LIPA      |
|  | NPTX1  |  | LIPC      |
|  | NPY    |  | LIPE      |
|  | NPY2R  |  | LIPG      |
|  | NPY4R  |  | LIPI      |
|  | NPY6R  |  | LMCD1     |
|  | NR0B1  |  | LMNA      |
|  | NR1D2  |  | LMNB1     |
|  | NR1H2  |  | LMO4      |
|  | NR1H3  |  | LMOD1     |
|  | NR1H4  |  | LMX1B     |
|  | NR2E3  |  | LOX       |
|  | NR3C1  |  | LPA       |
|  | NR3C2  |  | LPAR1     |
|  | NR4A1  |  | LPAR3     |
|  | NR4A2  |  | LPAR4     |
|  | NRDC   |  | LPCAT3    |
|  | NRF1   |  | LPIN1     |
|  | NRG1   |  | LPIN2     |
|  | NRG3   |  | LPIN3     |
|  | NRG4   |  | LPL       |
|  | NRGN   |  | LPO       |
|  | NRP1   |  | LPP       |
|  | NTN1   |  | LPXN      |
|  | NTNG2  |  | LRBA      |
|  | NTRK1  |  | LRG1      |
|  | NTRK2  |  | LRIG1     |
|  | NTS    |  | LRIT1     |
|  | NUCB2  |  | LRP1      |
|  | OAZ1   |  | LRP1B     |
|  | OBSCN  |  | LRP2      |
|  | ODC1   |  | LRP2BP    |
|  | OGA    |  | LRP5      |
|  | OGG1   |  | LRP6      |
|  | OGN    |  | LRP8      |

|  |         |  |         |
|--|---------|--|---------|
|  | OGT     |  | LRRC32  |
|  | OLR1    |  | LRRTM4  |
|  | ONECUT2 |  | LSAMP   |
|  | ONECUT3 |  | LSM1    |
|  | OPA1    |  | LSR     |
|  | OPLAH   |  | LSS     |
|  | OPN1MW  |  | LTA     |
|  | OPN1SW  |  | LTA4H   |
|  | OPRL1   |  | LTB     |
|  | OPRM1   |  | LTB4R   |
|  | OR13G1  |  | LTBR    |
|  | ORM2    |  | LTF     |
|  | OSM     |  | LUM     |
|  | OSTN    |  | LUZP2   |
|  | OTOR    |  | LXN     |
|  | OXCT1   |  | LY75    |
|  | OXT     |  | LYN     |
|  | OXTR    |  | LYPLA1  |
|  | P2RX7   |  | LYST    |
|  | P2RY1   |  | LYVE1   |
|  | P2RY11  |  | LYZ     |
|  | P2RY12  |  | MACF1   |
|  | P2RY13  |  | MACROD2 |
|  | P2RY2   |  | MADCAM1 |
|  | P2RY4   |  | MAEA    |
|  | P2RY6   |  | MAF     |
|  | P3H3    |  | MAFB    |
|  | P4HA2   |  | MALT1   |
|  | P4HB    |  | MAMLD1  |
|  | PAEP    |  | MAOA    |
|  | PAF1    |  | MAP2K1  |
|  | PAK1    |  | MAP2K5  |
|  | PALLD   |  | MAP3K5  |
|  | PAPOLG  |  | MAP3K7  |
|  | PAPPA   |  | MAP4K4  |
|  | PAPPA2  |  | MAP4K5  |
|  | PARD6A  |  | MAP6    |
|  | PARK7   |  | MAP9    |
|  | PARP1   |  | MAPK1   |
|  | PAX6    |  | MAPK10  |
|  | PBRM1   |  | MAPK11  |
|  | PBX2P1  |  | MAPK14  |
|  | PCBD1   |  | MAPK3   |
|  | PCIF1   |  | MAPK6   |
|  | PCNA    |  | MAPK7   |
|  | PCSK2   |  | MAPK8   |
|  | PCSK5   |  | MAPK9   |

|  |         |  |          |
|--|---------|--|----------|
|  | PCSK6   |  | MAPKAPK2 |
|  | PCSK7   |  | MAPKAPK5 |
|  | PCSK9   |  | MAPT     |
|  | PCTP    |  | MARS     |
|  | PCYT1A  |  | MAS1     |
|  | PDC     |  | MASP1    |
|  | PDCD1   |  | MASP2    |
|  | PDCD4   |  | MATN1    |
|  | PDE3A   |  | MATN2    |
|  | PDE3B   |  | MAZ      |
|  | PDE4D   |  | MB       |
|  | PDE5A   |  | MBD2     |
|  | PDGFC   |  | MBL2     |
|  | PDGFD   |  | MBTPS1   |
|  | PDGFRA  |  | MBTPS2   |
|  | PDGFRB  |  | MC1R     |
|  | PDIA6   |  | MC4R     |
|  | PDLIM7  |  | MCAT     |
|  | PDPK1   |  | MCCC1    |
|  | PDX1    |  | MCF2L    |
|  | PDXK    |  | MCIDAS   |
|  | PDZD2   |  | MCPH1    |
|  | PDZK1   |  | MCTP1    |
|  | PEAR1   |  | MDK      |
|  | PELI1   |  | MDM2     |
|  | PENK    |  | MECP2    |
|  | PEPD    |  | MED17    |
|  | PER2    |  | MED28    |
|  | PEX6    |  | MEF2A    |
|  | PF4     |  | MEF2C    |
|  | PFN1    |  | MEFV     |
|  | PGAM5   |  | MERTK    |
|  | PGD     |  | METRN    |
|  | PGF     |  | MFAP4    |
|  | PGLYRP1 |  | MFGE8    |
|  | PGRMC1  |  | MFN2     |
|  | PHACTR1 |  | MGLL     |
|  | PHGDH   |  | MGMT     |
|  | PHLDA1  |  | MGP      |
|  | PHLPP2  |  | MIA      |
|  | PI3     |  | MIA3     |
|  | PIAS1   |  | MICA     |
|  | PICALM  |  | MICAL3   |
|  | PIGF    |  | MICU1    |
|  | PIK3C2A |  | MICU3    |
|  | PIK3C2G |  | MIF      |
|  | PIK3CA  |  | MIR137   |

|  |          |  |                    |
|--|----------|--|--------------------|
|  | PIK3CD   |  | MIR6792            |
|  | PIK3CG   |  | MLANA              |
|  | PIM1     |  | MLKL               |
|  | PINK1    |  | MLN                |
|  | PIP      |  | MLXIPL             |
|  | PIPOX    |  | MLYCD              |
|  | PIR      |  | MMD                |
|  | PITX1    |  | MME                |
|  | PITX2    |  | MMEL1              |
|  | PKM      |  | MMP1               |
|  | PKN1     |  | MMP10              |
|  | PLA2G1B  |  | MMP11              |
|  | PLA2G4A  |  | MMP12              |
|  | PLA2G7   |  | MMP13              |
|  | PLA2R1   |  | MMP16              |
|  | PLAUR    |  | MMP17              |
|  | PLCL2    |  | MMP19              |
|  | PLD1     |  | MMP2               |
|  | PLD2     |  | MMP3               |
|  | PLK2     |  | MMP7               |
|  | PLK3     |  | MMP8               |
|  | PLK4     |  | MMP9               |
|  | PLN      |  | MMRN1              |
|  | PLPP3    |  | MMRN2              |
|  | PLTP     |  | MMUT               |
|  | PMCH     |  | MNDA               |
|  | PML      |  | MORC3              |
|  | PNN      |  | MPC2               |
|  | PNOC     |  | MPI                |
|  | PNPLA3   |  | MPL                |
|  | PODXL    |  | MPP2               |
|  | POFUT1   |  | MPPED2             |
|  | POMC     |  | MPZL2              |
|  | PON1     |  | MRAS               |
|  | POR      |  | MRC1               |
|  | POSTN    |  | MROH2A             |
|  | POU2F1   |  | MRPS6              |
|  | POU2F3   |  | MS4A1              |
|  | POU3F4   |  | MSANTD3-<br>TMEFF1 |
|  | PPARA    |  | MSC                |
|  | PPARD    |  | MSH2               |
|  | PPARG    |  | MSH5               |
|  | PPARGC1A |  | MSN                |
|  | PPARGC1B |  | MSR1               |
|  | PPIA     |  | MST1               |
|  | PPIF     |  | MSTN               |

|  |         |  |          |
|--|---------|--|----------|
|  | PIIP5K1 |  | MSX1     |
|  | PPL     |  | MT1DP    |
|  | PPP1R10 |  | MT1F     |
|  | PPRC1   |  | MT2A     |
|  | PPY     |  | MTAP     |
|  | PRDM2   |  | MTCH2    |
|  | PRDX2   |  | MT-CO1   |
|  | PRDX3   |  | MT-CYB   |
|  | PRDX5   |  | MTFMT    |
|  | PRH1    |  | MTHFD1   |
|  | PRKAR2A |  | MTHFD1L  |
|  | PRKAR2B |  | MTHFD2   |
|  | PRKCA   |  | MTHFR    |
|  | PRKCB   |  | MTHFS    |
|  | PRKCD   |  | MTMR3    |
|  | PRKD1   |  | MT-ND1   |
|  | PRKG1   |  | MT-ND2   |
|  | PRKN    |  | MT-ND3   |
|  | PRMT3   |  | MT-ND4   |
|  | PRMT5   |  | MT-ND4L  |
|  | PRNP    |  | MT-ND5   |
|  | PROCR   |  | MT-ND6   |
|  | PROKR1  |  | MTOR     |
|  | PRORP   |  | MTR      |
|  | PRSS27  |  | MT-RNR1  |
|  | PRTN3   |  | MT-RNR2  |
|  | PSD     |  | MTRNR2L8 |
|  | PSD4    |  | MTRR     |
|  | PSMA6   |  | MTSS1    |
|  | PSMA7   |  | MTTP     |
|  | PSMG1   |  | MTX1     |
|  | PSRC1   |  | MUC1     |
|  | PTCRA   |  | MUC16    |
|  | PTEN    |  | MUC5AC   |
|  | PTGDR   |  | MUTYH    |
|  | PTGER1  |  | MVD      |
|  | PTGER2  |  | MVK      |
|  | PTGES   |  | MVP      |
|  | PTGIR   |  | MXD1     |
|  | PTGIS   |  | MYC      |
|  | PTGR1   |  | MYD88    |
|  | PTGS1   |  | MYH11    |
|  | PTGS2   |  | MYH15    |
|  | PTH     |  | MYH7B    |
|  | PTH1R   |  | MYH9     |
|  | PTHLH   |  | MYLIP    |
|  | PTK2    |  | MYLK     |

|  |         |  |          |
|--|---------|--|----------|
|  | PTK2B   |  | MYOC     |
|  | PTN     |  | MYOCD    |
|  | PTPN1   |  | MYOM2    |
|  | PTPN11  |  | MYRF     |
|  | PTPN22  |  | NAAA     |
|  | PTPRC   |  | NAMPT    |
|  | PTPRD   |  | NANOS1   |
|  | PTPRU   |  | NANOS2   |
|  | PTS     |  | NANOS3   |
|  | PXDN    |  | NAPIL4   |
|  | PYCARD  |  | NAPEPLD  |
|  | PZP     |  | NAT2     |
|  | QDPR    |  | NAT8     |
|  | QKI     |  | NAV2     |
|  | QPCT    |  | NAXE     |
|  | RACK1   |  | NBEA     |
|  | RAD50   |  | NBL1     |
|  | RAD51D  |  | NBN      |
|  | RAF1    |  | NBPF3    |
|  | RAG2    |  | NCAM1    |
|  | RAMP1   |  | NCAM2    |
|  | RAN     |  | NCEH1    |
|  | RAPGEF1 |  | NCF1     |
|  | RAPGEF3 |  | NCOA6    |
|  | RAPGEF5 |  | NCOR1    |
|  | RARRES2 |  | NDC80    |
|  | RASA1   |  | NDRG1    |
|  | RASA4   |  | NDRG2    |
|  | RASGRF2 |  | NDUFA1   |
|  | RASL12  |  | NDUFA10  |
|  | RBM10   |  | NDUFA11  |
|  | RBP1    |  | NDUFA12  |
|  | RBP4    |  | NDUFA13  |
|  | RBPJ    |  | NDUFA2   |
|  | RCAN1   |  | NDUFA3   |
|  | RCN1    |  | NDUFA4   |
|  | RECQL5  |  | NDUFA4L2 |
|  | REG1A   |  | NDUFA5   |
|  | REM1    |  | NDUFA6   |
|  | REN     |  | NDUFA7   |
|  | RET     |  | NDUFA8   |
|  | RETN    |  | NDUFA9   |
|  | RFLNA   |  | NDUFAB1  |
|  | RGN     |  | NDUFAF1  |
|  | RGS1    |  | NDUFAF2  |
|  | RGS5    |  | NDUFAF3  |
|  | RGS7    |  | NDUFAF4  |

|  |         |  |          |
|--|---------|--|----------|
|  | RHBDF2  |  | NDUFB1   |
|  | RHCE    |  | NDUFB10  |
|  | RHOJ    |  | NDUFB11  |
|  | RIPK1   |  | NDUFB2   |
|  | RIPK2   |  | NDUFB3   |
|  | RIPK3   |  | NDUFB4   |
|  | RIPOR2  |  | NDUFB5   |
|  | RNASE1  |  | NDUFB6   |
|  | RNASE2  |  | NDUFB7   |
|  | RNASE3  |  | NDUFB8   |
|  | RNF13   |  | NDUFB9   |
|  | RNF182  |  | NDUFC1   |
|  | RNH1    |  | NDUFC2   |
|  | RNLS    |  | NDUFS1   |
|  | ROCK1   |  | NDUFS2   |
|  | ROCK2   |  | NDUFS3   |
|  | ROS1    |  | NDUFS4   |
|  | RPIA    |  | NDUFS5   |
|  | RPL17   |  | NDUFS6   |
|  | RRM1    |  | NDUFS7   |
|  | RRS1    |  | NDUFS8   |
|  | RSAD2   |  | NDUFV1   |
|  | RUNX1   |  | NDUFV2   |
|  | RXRA    |  | NDUFV3   |
|  | RYR1    |  | NECTIN1  |
|  | RYR2    |  | NECTIN2  |
|  | RYR3    |  | NEDD4    |
|  | S100A1  |  | NEDD9    |
|  | S100A11 |  | NEFL     |
|  | S100A12 |  | NEGR1    |
|  | S100A4  |  | NEIL3    |
|  | S100A6  |  | NELFCD   |
|  | S100A8  |  | NES      |
|  | S100A9  |  | NEU1     |
|  | S100B   |  | NEUROD4  |
|  | S100P   |  | NEXN     |
|  | S1PR1   |  | NEXN-AS1 |
|  | S1PR2   |  | NF1      |
|  | S1PR3   |  | NF2      |
|  | SARS    |  | NFAT5    |
|  | SAT1    |  | NFATC1   |
|  | SAYS1   |  | NFE2L2   |
|  | SCAF1   |  | NFIA     |
|  | SCAI    |  | NFKB1    |
|  | SCARB1  |  | NFKB2    |
|  | SCD     |  | NFKBIA   |
|  | SCG2    |  | NGB      |



|  |           |  |        |
|--|-----------|--|--------|
|  | SCN4A     |  | NGF    |
|  | SCT       |  | NGFR   |
|  | SCUBE1    |  | NHEJ1  |
|  | SDC1      |  | NID1   |
|  | SDC2      |  | NIFK   |
|  | SDC4      |  | NINJ2  |
|  | SDK1      |  | NISCH  |
|  | SEC14L2   |  | NKAPL  |
|  | SEC24D    |  | NLRC4  |
|  | SELE      |  | NLRP1  |
|  | SELENOP   |  | NLRP11 |
|  | SELL      |  | NLRP3  |
|  | SELP      |  | NME1   |
|  | SELPLG    |  | NNMT   |
|  | SEMA3A    |  | NNT    |
|  | SEMA3F    |  | NOC2L  |
|  | SENP1     |  | NOD1   |
|  | SERHL     |  | NOD2   |
|  | SERPINA1  |  | NOP56  |
|  | SERPINA12 |  | NOS1   |
|  | SERPINA3  |  | NOS1AP |
|  | SERPINA4  |  | NOS2   |
|  | SERPINA5  |  | NOS3   |
|  | SERPINA6  |  | NOTCH1 |
|  | SERPINA7  |  | NOTCH3 |
|  | SERPINB2  |  | NOX1   |
|  | SERPINB6  |  | NOX4   |
|  | SERPINC1  |  | NOX5   |
|  | SERPIND1  |  | NOXA1  |
|  | SERPINE1  |  | NPC1   |
|  | SERPINF1  |  | NPC1L1 |
|  | SERPINF2  |  | NPHS1  |
|  | SERPING1  |  | NPHS2  |
|  | SERPINH1  |  | NPPA   |
|  | SESN2     |  | NPPB   |
|  | SETD2     |  | NPPC   |
|  | SF3A2     |  | NPR1   |
|  | SFRP1     |  | NPR2   |
|  | SFRP2     |  | NPR3   |
|  | SFRP4     |  | NPS    |
|  | SFRP5     |  | NPTX1  |
|  | SFTPA1    |  | NPVF   |
|  | SFTPBP    |  | NPY    |
|  | SFTPD     |  | NQO1   |
|  | SGCA      |  | NR0B1  |
|  | SGCD      |  | NR0B2  |
|  | SGK1      |  | NR1D2  |

|  |          |  |        |
|--|----------|--|--------|
|  | SGSM3    |  | NR1H2  |
|  | SH2B1    |  | NR1H3  |
|  | SH2B3    |  | NR1H4  |
|  | SH3BP4   |  | NR1I2  |
|  | SH3BP5   |  | NR1I3  |
|  | SHBG     |  | NR2C2  |
|  | SHC2     |  | NR2F2  |
|  | SHD      |  | NR3C1  |
|  | SHF      |  | NR3C2  |
|  | SIK3     |  | NR4A1  |
|  | SIRT1    |  | NR4A2  |
|  | SIRT2    |  | NR4A3  |
|  | SIRT3    |  | NR5A2  |
|  | SIRT5    |  | NR6A1  |
|  | SIRT6    |  | NRDE2  |
|  | SKAP1    |  | NRF1   |
|  | SKAP2    |  | NRG1   |
|  | SKIL     |  | NSF    |
|  | SKP1     |  | NSMCE1 |
|  | SLAMF6   |  | NT5C1A |
|  | SLAMF7   |  | NT5C2  |
|  | SLC11A1  |  | NTF3   |
|  | SLC12A1  |  | NTM    |
|  | SLC12A3  |  | NTN1   |
|  | SLC12A8  |  | NTRK1  |
|  | SLC17A5  |  | NTRK2  |
|  | SLC19A1  |  | NUBPL  |
|  | SLC1A7   |  | NUCB2  |
|  | SLC22A3  |  | NUP205 |
|  | SLC22A4  |  | NUP43  |
|  | SLC22A5  |  | NUS1   |
|  | SLC25A1  |  | NUTM2F |
|  | SLC25A10 |  | NXPH4  |
|  | SLC25A16 |  | OCM2   |
|  | SLC25A3  |  | ODC1   |
|  | SLC25A4  |  | OGA    |
|  | SLC28A1  |  | OGG1   |
|  | SLC29A1  |  | OGN    |
|  | SLC2A1   |  | OGT    |
|  | SLC2A4   |  | OIP5   |
|  | SLC2A4RG |  | OLR1   |
|  | SLC33A1  |  | OMD    |
|  | SLC4A4   |  | OMP    |
|  | SLC5A1   |  | OPN1LW |
|  | SLC5A2   |  | OPN1SW |
|  | SLC5A3   |  | OPN4   |
|  | SLC5A5   |  | OPRL1  |

|  |         |  |         |
|--|---------|--|---------|
|  | SLC5A6  |  | OPTN    |
|  | SLC6A18 |  | OR2D2   |
|  | SLC6A3  |  | OR2M7   |
|  | SLC6A4  |  | OR5H2   |
|  | SLC8A1  |  | ORMDL3  |
|  | SLC9A1  |  | OSBP    |
|  | SLCO1B1 |  | OSBP2   |
|  | SLCO1C1 |  | OSBPL10 |
|  | SLCO3A1 |  | OSBPL1A |
|  | SLCO6A1 |  | OSBPL8  |
|  | SLN     |  | OSCAR   |
|  | SLPI    |  | OSGIN1  |
|  | SLURP1  |  | OSM     |
|  | SMAD1   |  | OSMR    |
|  | SMAD2   |  | OVOL2   |
|  | SMAD3   |  | OXR1    |
|  | SMAD4   |  | P2RX1   |
|  | SMAD7   |  | P2RX7   |
|  | SMAD9   |  | P2RY1   |
|  | SMARCA4 |  | P2RY12  |
|  | SMC2    |  | P2RY13  |
|  | SMC3    |  | P2RY2   |
|  | SMG6    |  | P2RY4   |
|  | SMPD1   |  | P2RY6   |
|  | SMPD2   |  | P3H3    |
|  | SMPD4   |  | P4HB    |
|  | SMS     |  | PACS2   |
|  | SMTN    |  | PADI4   |
|  | SNX17   |  | PAEP    |
|  | SOAT1   |  | PAGR1   |
|  | SOCS3   |  | PAH     |
|  | SOD2    |  | PAK1    |
|  | SORBS2  |  | PALLD   |
|  | SORBS3  |  | PAM     |
|  | SORD    |  | PANX1   |
|  | SOX7    |  | PAPPA   |
|  | SP140   |  | PAQR8   |
|  | SP7     |  | PARG    |
|  | SPAG8   |  | PARK7   |
|  | SPARC   |  | PARP1   |
|  | SPATA7  |  | PARP14  |
|  | SPECC1L |  | PATE1   |
|  | SPEF2   |  | PATZ1   |
|  | SPESP1  |  | PAX2    |
|  | SPHK1   |  | PBRM1   |
|  | SPINT2  |  | PBX2P1  |
|  | SPN     |  | PCBD1   |

|  |            |  |         |
|--|------------|--|---------|
|  | SPON1      |  | PCDH8   |
|  | SPP1       |  | PCDH9   |
|  | SPRR3      |  | PCNA    |
|  | SQSTM1     |  | PCOLCE2 |
|  | SRA1       |  | PCSK1   |
|  | SRC        |  | PCSK5   |
|  | SREBF1     |  | PCSK6   |
|  | SREBF2     |  | PCSK7   |
|  | SRF        |  | PCSK9   |
|  | SRGN       |  | PCTP    |
|  | SRI        |  | PCYT1A  |
|  | SRY        |  | PCYT1B  |
|  | SS18L1     |  | PDC     |
|  | SSB        |  | PDCD4   |
|  | SST        |  | PDCD5   |
|  | SSTR2      |  | PDE1A   |
|  | ST13       |  | PDE1C   |
|  | ST3GAL4    |  | PDE2A   |
|  | ST6GALNAC1 |  | PDE3A   |
|  | ST8SIA4    |  | PDE3B   |
|  | STAB1      |  | PDE4D   |
|  | STAG2      |  | PDE5A   |
|  | STAT1      |  | PDE9A   |
|  | STAT3      |  | PDGFA   |
|  | STAT4      |  | PDGFB   |
|  | STC1       |  | PDGFC   |
|  | STC2       |  | PDGFD   |
|  | STH        |  | PDGFRA  |
|  | STIM1      |  | PDGFRB  |
|  | STK11      |  | PDIA2   |
|  | STS        |  | PDK4    |
|  | STXBP2     |  | PDLIM1  |
|  | SULT1E1    |  | PDLIM7  |
|  | SULT2A1    |  | PDPN    |
|  | SULT4A1    |  | PDX1    |
|  | SUMO1      |  | PDYN    |
|  | SUV39H1    |  | PDZD8   |
|  | SYNM       |  | PDZK1   |
|  | SYT1       |  | PEBP1   |
|  | TAB1       |  | PEG10   |
|  | TACR1      |  | PELI2   |
|  | TACR3      |  | PELI3   |
|  | TALDO1     |  | PEMT    |
|  | TAOK2      |  | PES1    |
|  | TAPBP      |  | PF4     |
|  | TAS2R50    |  | PF4V1   |
|  | TBC1D1     |  | PFN1    |

|  |          |  |         |
|--|----------|--|---------|
|  | TBC1D10C |  | PGF     |
|  | TBC1D2   |  | PGLYRP1 |
|  | TBC1D4   |  | PGP     |
|  | TBCA     |  | PGR     |
|  | TBCD     |  | PGRMC1  |
|  | TBP      |  | PHACTR1 |
|  | TBPL1    |  | PHEX    |
|  | TBX1     |  | PHF14   |
|  | TBX21    |  | PHF21A  |
|  | TBXA2R   |  | PHGDH   |
|  | TBXAS1   |  | PHLDA1  |
|  | TBXT     |  | PHPT1   |
|  | TCF21    |  | PI3     |
|  | TCF7L2   |  | PIAS1   |
|  | TCFL5    |  | PIAS3   |
|  | TCHP     |  | PIAS4   |
|  | TCN1     |  | PIK3CA  |
|  | TCP1     |  | PIK3CD  |
|  | TEF      |  | PIK3CG  |
|  | TENM1    |  | PIK3R1  |
|  | TENM3    |  | PIK3R3  |
|  | TERT     |  | PINX1   |
|  | TES      |  | PINX1   |
|  | TET1     |  | PITRM1  |
|  | TF       |  | PITX2   |
|  | TFAM     |  | PKM     |
|  | TFAP2A   |  | PKN2    |
|  | TFEB     |  | PKNOX2  |
|  | TFF3     |  | PLA1A   |
|  | TFG      |  | PLA2G10 |
|  | TFPI     |  | PLA2G15 |
|  | TGFB1    |  | PLA2G1B |
|  | TGFB3    |  | PLA2G2A |
|  | TGFBI    |  | PLA2G2D |
|  | TGFBR1   |  | PLA2G2E |
|  | THAP5    |  | PLA2G2F |
|  | THBD     |  | PLA2G3  |
|  | THBS1    |  | PLA2G4A |
|  | THBS2    |  | PLA2G7  |
|  | THBS4    |  | PLAC1   |
|  | THPO     |  | PLAUR   |
|  | THRA     |  | PLCB2   |
|  | THRB     |  | PLCB3   |
|  | TIGAR    |  | PLCG2   |
|  | TIMM8A   |  | PLD2    |
|  | TIMP1    |  | PLEKHO1 |
|  | TIMP2    |  | PLIN1   |

|  |           |  |          |
|--|-----------|--|----------|
|  | TIMP4     |  | PLIN2    |
|  | TKT       |  | PLIN3    |
|  | TKTL1     |  | PLK4     |
|  | TLE5      |  | PLN      |
|  | TLN1      |  | PLPP2    |
|  | TLR1      |  | PLPP3    |
|  | TLR2      |  | PLTP     |
|  | TLR3      |  | PLXNB1   |
|  | TLR4      |  | PLXNB2   |
|  | TLR7      |  | PLXND1   |
|  | TLR9      |  | PML      |
|  | TLX1NB    |  | PMPCA    |
|  | TLX2      |  | PNKD     |
|  | TM6SF2    |  | PNLIP    |
|  | TMEFF1    |  | PNN      |
|  | TMEFF2    |  | PNOC     |
|  | TMEM123   |  | PNPLA2   |
|  | TMEM38B   |  | PNPLA3   |
|  | TMSB4X    |  | PODN     |
|  | TNC       |  | PODXL    |
|  | TNF       |  | POLG     |
|  | TNFAIP6   |  | POLK     |
|  | TNFRSF10B |  | POLR1D   |
|  | TNFRSF10C |  | POLR2A   |
|  | TNFRSF11B |  | POLR2I   |
|  | TNFRSF13C |  | POMC     |
|  | TNFRSF1A  |  | PON1     |
|  | TNFRSF1B  |  | POP1     |
|  | TNFRSF4   |  | POR      |
|  | TNFRSF9   |  | POSTN    |
|  | TNFSF10   |  | POU2F1   |
|  | TNFSF11   |  | POU2F3   |
|  | TNFSF13B  |  | PPARA    |
|  | TNFSF18   |  | PPARD    |
|  | TNFSF4    |  | PPARG    |
|  | TNNC1     |  | PPARGC1A |
|  | TNNI3     |  | PPARGC1B |
|  | TNNI3K    |  | PPBP     |
|  | TNNT1     |  | PPCDC    |
|  | TNNT2     |  | PPIA     |
|  | TNRC6B    |  | PPL      |
|  | TNS1      |  | PPM1A    |
|  | TNS3      |  | PPM1B    |
|  | TNXB      |  | PPM1D    |
|  | TOLLIP    |  | PPP1R12A |
|  | TOPBP1    |  | PPP1R3B  |
|  | TP53      |  | PPP2R2A  |

|  |          |  |         |
|--|----------|--|---------|
|  | TP53INP1 |  | PPP2R2C |
|  | TP53INP2 |  | PPP4R2  |
|  | TPH1     |  | PQBP1   |
|  | TPI1     |  | PRB2    |
|  | TPM1     |  | PRC1    |
|  | TPO      |  | PRCP    |
|  | TPPP     |  | PRDX1   |
|  | TPSG1    |  | PRDX2   |
|  | TPT1     |  | PRDX5   |
|  | TRAF3IP2 |  | PRDX6   |
|  | TRAF6    |  | PRELP   |
|  | TRAP1    |  | PREX1   |
|  | TREM1    |  | PRG4    |
|  | TRH      |  | PRH1    |
|  | TRIB1    |  | PRIM1   |
|  | TRIB3    |  | PRKAA1  |
|  | TRIM39   |  | PRKCA   |
|  | TRIM54   |  | PRKCB   |
|  | TRIM63   |  | PRKCH   |
|  | TRIM72   |  | PRKD1   |
|  | TRIT1    |  | PRKG1   |
|  | TRPA1    |  | PRKG2   |
|  | TRPC3    |  | PRLR    |
|  | TRPC4    |  | PRMT1   |
|  | TRPC6    |  | PRMT2   |
|  | TRPM2    |  | PRMT3   |
|  | TRPM4    |  | PRNP    |
|  | TRPV1    |  | PROCR   |
|  | TRPV2    |  | PROS1   |
|  | TSC22D3  |  | PROX1   |
|  | TSN      |  | PRRC2A  |
|  | TSPAN10  |  | PRRX1   |
|  | TST      |  | PRSS27  |
|  | TTC32    |  | PRTN3   |
|  | TTL      |  | PSD     |
|  | TTN      |  | PSEN1   |
|  | TTPA     |  | PSMA6   |
|  | TTR      |  | PSMA7   |
|  | TUBB     |  | PSMB8   |
|  | TUBB1    |  | PSME3   |
|  | TUBB2A   |  | PSMG1   |
|  | TUBB2B   |  | PSRC1   |
|  | TUBB3    |  | PSTPIP2 |
|  | TUBB4A   |  | PTAFR   |
|  | TUBB4B   |  | PTEN    |
|  | TUBB6    |  | PTGDS   |
|  | TUBB8    |  | PTGES   |

|  |        |  |         |
|--|--------|--|---------|
|  | TUSC1  |  | PTGIR   |
|  | TXN    |  | PTGIS   |
|  | TXNDC9 |  | PTGS1   |
|  | TXNIP  |  | PTGS2   |
|  | TXNL1  |  | PTH     |
|  | TXNL4B |  | PTHLH   |
|  | TXNRD2 |  | PTK2    |
|  | TYMP   |  | PTK2B   |
|  | TYR    |  | PTMA    |
|  | TYRO3  |  | PTN     |
|  | UBD    |  | PTOV1   |
|  | UBE2K  |  | PTPN1   |
|  | UBE2Z  |  | PTPN11  |
|  | UCHL1  |  | PTPN2   |
|  | UCN    |  | PTPN22  |
|  | UCN2   |  | PTPN6   |
|  | UCN3   |  | PTPRC   |
|  | UCP2   |  | PTPRG   |
|  | UCP3   |  | PTPRN2  |
|  | UGCG   |  | PTPRU   |
|  | UGT1A1 |  | PTS     |
|  | UMOD   |  | PVR     |
|  | UNC5B  |  | PXDN    |
|  | URI1   |  | PYCARD  |
|  | UTP25  |  | PYGB    |
|  | UTS2   |  | PYY     |
|  | VAMP8  |  | PZP     |
|  | VASP   |  | QDPR    |
|  | VCAM1  |  | QKI     |
|  | VCAN   |  | QPCT    |
|  | VCL    |  | QPCTL   |
|  | VDR    |  | QSOX1   |
|  | VEGFA  |  | RAB37   |
|  | VEGFB  |  | RAC2    |
|  | VEGFC  |  | RAD21   |
|  | VEGFD  |  | RAF1    |
|  | VHL    |  | RAG1    |
|  | VIM    |  | RAG2    |
|  | VIP    |  | RALBP1  |
|  | VKORC1 |  | RAPGEF3 |
|  | VLDLR  |  | RAPGEF5 |
|  | VNN3   |  | RARA    |
|  | VPS51  |  | RARB    |
|  | VWF    |  | RARRES2 |
|  | WDR12  |  | RASD1   |
|  | WDR64  |  | RASEF   |
|  | WFDC1  |  | RASGRP2 |



|  |        |  |        |
|--|--------|--|--------|
|  | WIF1   |  | RB1    |
|  | WLS    |  | RBFOX1 |
|  | WNT4   |  | RBM10  |
|  | WT1    |  | RBM38  |
|  | WTAP   |  | RBM45  |
|  | XBP1   |  | RBP4   |
|  | XCL1   |  | RBPJ   |
|  | XIAP   |  | RBPMS  |
|  | XPR1   |  | RCAN1  |
|  | XRCC1  |  | RCN2   |
|  | XRCC3  |  | RDX    |
|  | YBX1   |  | REEP5  |
|  | YTHDF3 |  | REG1A  |
|  | ZBTB12 |  | RELA   |
|  | ZC3HC1 |  | RELB   |
|  | ZDHHC2 |  | RELN   |
|  | ZEB2   |  | REN    |
|  | ZFHX3  |  | REST   |
|  | ZFP90  |  | RETN   |
|  | ZGLP1  |  | RETNLB |
|  | ZGPAT  |  | RFC3   |
|  | ZMYM2  |  | RFTN1  |
|  | ZNF185 |  | RFX5   |
|  | ZNF202 |  | RGCC   |
|  | ZNF433 |  | RGL1   |
|  | ZNF536 |  | RGN    |
|  | ZNF627 |  | RGS1   |
|  |        |  | RGS2   |
|  |        |  | RGS3   |
|  |        |  | RGS4   |
|  |        |  | RGS5   |
|  |        |  | RGS6   |
|  |        |  | RGS7   |
|  |        |  | RHBDF2 |
|  |        |  | RHD    |
|  |        |  | RHOA   |
|  |        |  | RHOB   |
|  |        |  | RHOF   |
|  |        |  | RILPL2 |
|  |        |  | RIMS1  |
|  |        |  | RIPK2  |
|  |        |  | RIPK3  |
|  |        |  | RNASE1 |
|  |        |  | RNASE2 |
|  |        |  | RNASE3 |
|  |        |  | RNASE6 |
|  |        |  | RNF112 |

|  |  |  |          |
|--|--|--|----------|
|  |  |  | RNF2     |
|  |  |  | RNF213   |
|  |  |  | RNF5     |
|  |  |  | RNLS     |
|  |  |  | RNU7-62P |
|  |  |  | ROCK1    |
|  |  |  | ROCK2    |
|  |  |  | ROR2     |
|  |  |  | RORA     |
|  |  |  | RORC     |
|  |  |  | RP9      |
|  |  |  | RPA2     |
|  |  |  | RPE      |
|  |  |  | RPGRIP1L |
|  |  |  | RPIA     |
|  |  |  | RPL17    |
|  |  |  | RPL27A   |
|  |  |  | RPS3A    |
|  |  |  | RPS6KB1  |
|  |  |  | RPTOR    |
|  |  |  | RRS1     |
|  |  |  | RSAD2    |
|  |  |  | RSU1     |
|  |  |  | RTCA     |
|  |  |  | RTEL1    |
|  |  |  | RTL1     |
|  |  |  | RTN3     |
|  |  |  | RTN4     |
|  |  |  | RTRAF    |
|  |  |  | RUNX2    |
|  |  |  | RUNX3    |
|  |  |  | RXRA     |
|  |  |  | RXRG     |
|  |  |  | RYR2     |
|  |  |  | RYR3     |
|  |  |  | S100A1   |
|  |  |  | S100A10  |
|  |  |  | S100A11  |
|  |  |  | S100A12  |
|  |  |  | S100A4   |
|  |  |  | S100A6   |
|  |  |  | S100A7   |
|  |  |  | S100A8   |
|  |  |  | S100A9   |
|  |  |  | S100B    |
|  |  |  | S1PR1    |
|  |  |  | S1PR2    |

|  |  |  |           |
|--|--|--|-----------|
|  |  |  | S1PR3     |
|  |  |  | SAA4      |
|  |  |  | SAG       |
|  |  |  | SALL1     |
|  |  |  | SAMD1     |
|  |  |  | SAMD9     |
|  |  |  | SAMHD1    |
|  |  |  | SAMSN1    |
|  |  |  | SARS      |
|  |  |  | SASH1     |
|  |  |  | SAT1      |
|  |  |  | SCAF1     |
|  |  |  | SCAI      |
|  |  |  | SCARA5    |
|  |  |  | SCARB1    |
|  |  |  | SCARB2    |
|  |  |  | SCARF1    |
|  |  |  | SCD       |
|  |  |  | SCG3      |
|  |  |  | SCML4     |
|  |  |  | SCN5A     |
|  |  |  | SCP2      |
|  |  |  | SCT       |
|  |  |  | SCUBE1    |
|  |  |  | SCUBE2    |
|  |  |  | SDC1      |
|  |  |  | SDK2      |
|  |  |  | SEC14L2   |
|  |  |  | SECISBP2  |
|  |  |  | SELE      |
|  |  |  | SELENOK   |
|  |  |  | SELENOP   |
|  |  |  | SELENOS   |
|  |  |  | SELL      |
|  |  |  | SELP      |
|  |  |  | SELPLG    |
|  |  |  | SEMA3C    |
|  |  |  | SEMA3E    |
|  |  |  | SEMA4D    |
|  |  |  | SEMA7A    |
|  |  |  | SENP2     |
|  |  |  | SEPHS1    |
|  |  |  | SERGEF    |
|  |  |  | SERHL     |
|  |  |  | SERP2     |
|  |  |  | SERPINA1  |
|  |  |  | SERPINA10 |

|  |  |           |
|--|--|-----------|
|  |  | SERPINA12 |
|  |  | SERPINA3  |
|  |  | SERPINA4  |
|  |  | SERPINA5  |
|  |  | SERPINA6  |
|  |  | SERPINA7  |
|  |  | SERPINA9  |
|  |  | SERPINB2  |
|  |  | SERPINB9  |
|  |  | SERPINC1  |
|  |  | SERPIND1  |
|  |  | SERPINE1  |
|  |  | SERPINE2  |
|  |  | SERPINF1  |
|  |  | SERPINF2  |
|  |  | SERPING1  |
|  |  | SESN2     |
|  |  | SETBP1    |
|  |  | SETD2     |
|  |  | SETD7     |
|  |  | SF3B4     |
|  |  | SFRP4     |
|  |  | SFRP5     |
|  |  | SFTA3     |
|  |  | SFTPB     |
|  |  | SFTPD     |
|  |  | SGCA      |
|  |  | SGK1      |
|  |  | SGMS1     |
|  |  | SGMS2     |
|  |  | SGPL1     |
|  |  | SH2B3     |
|  |  | SH2D3C    |
|  |  | SH3BP4    |
|  |  | SHBG      |
|  |  | SHC1      |
|  |  | SHISA9    |
|  |  | SIGLEC1   |
|  |  | SIGLEC5   |
|  |  | SIGLEC9   |
|  |  | SIRPA     |
|  |  | SIRT1     |
|  |  | SIRT3     |
|  |  | SIRT5     |
|  |  | SIRT6     |
|  |  | SIRT7     |
|  |  | SKAP2     |

|  |  |  |          |
|--|--|--|----------|
|  |  |  | SKIL     |
|  |  |  | SLAMF7   |
|  |  |  | SLC10A2  |
|  |  |  | SLC11A2  |
|  |  |  | SLC12A3  |
|  |  |  | SLC14A1  |
|  |  |  | SLC14A2  |
|  |  |  | SLC16A3  |
|  |  |  | SLC16A8  |
|  |  |  | SLC17A2  |
|  |  |  | SLC17A3  |
|  |  |  | SLC17A4  |
|  |  |  | SLC17A5  |
|  |  |  | SLC18A3  |
|  |  |  | SLC22A1  |
|  |  |  | SLC22A11 |
|  |  |  | SLC22A12 |
|  |  |  | SLC22A4  |
|  |  |  | SLC25A1  |
|  |  |  | SLC25A10 |
|  |  |  | SLC25A14 |
|  |  |  | SLC25A19 |
|  |  |  | SLC25A22 |
|  |  |  | SLC25A25 |
|  |  |  | SLC25A3  |
|  |  |  | SLC25A32 |
|  |  |  | SLC25A43 |
|  |  |  | SLC27A2  |
|  |  |  | SLC28A1  |
|  |  |  | SLC2A1   |
|  |  |  | SLC2A10  |
|  |  |  | SLC2A2   |
|  |  |  | SLC2A4   |
|  |  |  | SLC2A4RG |
|  |  |  | SLC2A9   |
|  |  |  | SLC30A8  |
|  |  |  | SLC33A1  |
|  |  |  | SLC35A2  |
|  |  |  | SLC39A12 |
|  |  |  | SLC39A8  |
|  |  |  | SLC45A2  |
|  |  |  | SLC46A3  |
|  |  |  | SLC5A1   |
|  |  |  | SLC5A10  |
|  |  |  | SLC5A7   |
|  |  |  | SLC6A1   |
|  |  |  | SLC9A1   |

|  |  |  |         |
|--|--|--|---------|
|  |  |  | SLCO2B1 |
|  |  |  | SLCO6A1 |
|  |  |  | SLPI    |
|  |  |  | SLTM    |
|  |  |  | SMAD1   |
|  |  |  | SMAD2   |
|  |  |  | SMAD3   |
|  |  |  | SMAD7   |
|  |  |  | SMC2    |
|  |  |  | SMG6    |
|  |  |  | SMOC2   |
|  |  |  | SMPD1   |
|  |  |  | SMPD2   |
|  |  |  | SMPD3   |
|  |  |  | SMPDL3A |
|  |  |  | SMS     |
|  |  |  | SMTN    |
|  |  |  | SNCA    |
|  |  |  | SNF8    |
|  |  |  | SNRPG   |
|  |  |  | SNTB2   |
|  |  |  | SNX19   |
|  |  |  | SOAT1   |
|  |  |  | SOAT2   |
|  |  |  | SOCS1   |
|  |  |  | SOCS3   |
|  |  |  | SOCS6   |
|  |  |  | SOD1    |
|  |  |  | SOD2    |
|  |  |  | SORBS3  |
|  |  |  | SORCS1  |
|  |  |  | SORD    |
|  |  |  | SORL1   |
|  |  |  | SOS1    |
|  |  |  | SOST    |
|  |  |  | SOX18   |
|  |  |  | SOX6    |
|  |  |  | SP1     |
|  |  |  | SP2     |
|  |  |  | SPARC   |
|  |  |  | SPARCL1 |
|  |  |  | SPATA13 |
|  |  |  | SPDEF   |
|  |  |  | SPESP1  |
|  |  |  | SPHK1   |
|  |  |  | SPI1    |
|  |  |  | SPIN1   |

|  |  |  |          |
|--|--|--|----------|
|  |  |  | SPN      |
|  |  |  | SPON1    |
|  |  |  | SPON2    |
|  |  |  | SPOPL    |
|  |  |  | SPP1     |
|  |  |  | SPRR3    |
|  |  |  | SPRTN    |
|  |  |  | SPRY1    |
|  |  |  | SPTLC1   |
|  |  |  | SPTLC3   |
|  |  |  | SPX      |
|  |  |  | SQLE     |
|  |  |  | SQSTM1   |
|  |  |  | SRD5A1   |
|  |  |  | SREBF1   |
|  |  |  | SREBF2   |
|  |  |  | SRF      |
|  |  |  | SRGN     |
|  |  |  | SRI      |
|  |  |  | SRM      |
|  |  |  | SRR      |
|  |  |  | SRSF1    |
|  |  |  | SRSF10   |
|  |  |  | SRSF2    |
|  |  |  | SRY      |
|  |  |  | SSB      |
|  |  |  | SSBP1    |
|  |  |  | SST      |
|  |  |  | SSTR2    |
|  |  |  | SSTR4    |
|  |  |  | SSTR5    |
|  |  |  | ST13     |
|  |  |  | ST14     |
|  |  |  | ST3GAL4  |
|  |  |  | ST6GAL1  |
|  |  |  | STAB1    |
|  |  |  | STAB2    |
|  |  |  | STAP2    |
|  |  |  | STARD3NL |
|  |  |  | STAT1    |
|  |  |  | STAT2    |
|  |  |  | STAT3    |
|  |  |  | STAT4    |
|  |  |  | STAT6    |
|  |  |  | STC1     |
|  |  |  | STC2     |
|  |  |  | STEAP4   |

|  |  |  |         |
|--|--|--|---------|
|  |  |  | STH     |
|  |  |  | STIM1   |
|  |  |  | STIM2   |
|  |  |  | STK11   |
|  |  |  | STK25   |
|  |  |  | STRIP2  |
|  |  |  | STS     |
|  |  |  | STXBP5L |
|  |  |  | SUCNR1  |
|  |  |  | SULF2   |
|  |  |  | SULT1E1 |
|  |  |  | SUMO1   |
|  |  |  | SUMO4   |
|  |  |  | SYK     |
|  |  |  | SYNM    |
|  |  |  | SYNPO2  |
|  |  |  | SYT17   |
|  |  |  | TAB1    |
|  |  |  | TAB2    |
|  |  |  | TAC1    |
|  |  |  | TACR3   |
|  |  |  | TAF3    |
|  |  |  | TAGAP   |
|  |  |  | TAGLN   |
|  |  |  | TANC2   |
|  |  |  | TANK    |
|  |  |  | TAP1    |
|  |  |  | TARDBP  |
|  |  |  | TAS1R3  |
|  |  |  | TBC1D30 |
|  |  |  | TBCA    |
|  |  |  | TBP     |
|  |  |  | TBX18   |
|  |  |  | TBX20   |
|  |  |  | TBXA2R  |
|  |  |  | TBXAS1  |
|  |  |  | TCF21   |
|  |  |  | TCF3    |
|  |  |  | TCF7L2  |
|  |  |  | TCFL5   |
|  |  |  | TCHHL1  |
|  |  |  | TCHP    |
|  |  |  | TCIRG1  |
|  |  |  | TCP1    |
|  |  |  | TCTN1   |
|  |  |  | TEK     |
|  |  |  | TERF1   |



|  |  |  |         |
|--|--|--|---------|
|  |  |  | TERT    |
|  |  |  | TES     |
|  |  |  | TET1    |
|  |  |  | TET2    |
|  |  |  | TF      |
|  |  |  | TFAM    |
|  |  |  | TFAP2A  |
|  |  |  | TFEB    |
|  |  |  | TFF1    |
|  |  |  | TFF3    |
|  |  |  | TFG     |
|  |  |  | TFPI    |
|  |  |  | TFPI2   |
|  |  |  | TGFB1   |
|  |  |  | TGFB1I1 |
|  |  |  | TGFB3   |
|  |  |  | TGFBI   |
|  |  |  | TGFBR1  |
|  |  |  | TGFBR2  |
|  |  |  | TGM5    |
|  |  |  | TGM7    |
|  |  |  | TH      |
|  |  |  | THADA   |
|  |  |  | THBD    |
|  |  |  | THBS1   |
|  |  |  | THBS2   |
|  |  |  | THBS4   |
|  |  |  | THEMIS  |
|  |  |  | THRA    |
|  |  |  | THSD7A  |
|  |  |  | TICAM1  |
|  |  |  | TIGIT   |
|  |  |  | TIMD4   |
|  |  |  | TIMM23  |
|  |  |  | TIMP1   |
|  |  |  | TIMP2   |
|  |  |  | TIMP4   |
|  |  |  | TJP1    |
|  |  |  | TLR1    |
|  |  |  | TLR10   |
|  |  |  | TLR2    |
|  |  |  | TLR3    |
|  |  |  | TLR4    |
|  |  |  | TLR5    |
|  |  |  | TLR6    |
|  |  |  | TLR7    |
|  |  |  | TLR8    |

|  |  |  |           |
|--|--|--|-----------|
|  |  |  | TLR9      |
|  |  |  | TLX1NB    |
|  |  |  | TLX2      |
|  |  |  | TMEFF1    |
|  |  |  | TMEFF2    |
|  |  |  | TMEM11    |
|  |  |  | TMEM134   |
|  |  |  | TMEM18    |
|  |  |  | TMEM50B   |
|  |  |  | TMEM98    |
|  |  |  | TMF1      |
|  |  |  | TMPRSS6   |
|  |  |  | TMSB10    |
|  |  |  | TMSB4X    |
|  |  |  | TMX1      |
|  |  |  | TNC       |
|  |  |  | TNF       |
|  |  |  | TNFAIP3   |
|  |  |  | TNFAIP6   |
|  |  |  | TNFAIP8L2 |
|  |  |  | TNFRSF10A |
|  |  |  | TNFRSF10B |
|  |  |  | TNFRSF11A |
|  |  |  | TNFRSF11B |
|  |  |  | TNFRSF12A |
|  |  |  | TNFRSF13B |
|  |  |  | TNFRSF13C |
|  |  |  | TNFRSF14  |
|  |  |  | TNFRSF18  |
|  |  |  | TNFRSF1A  |
|  |  |  | TNFRSF1B  |
|  |  |  | TNFRSF25  |
|  |  |  | TNFRSF4   |
|  |  |  | TNFRSF6B  |
|  |  |  | TNFRSF8   |
|  |  |  | TNFRSF9   |
|  |  |  | TNFSF10   |
|  |  |  | TNFSF11   |
|  |  |  | TNFSF12   |
|  |  |  | TNFSF13   |
|  |  |  | TNFSF13B  |
|  |  |  | TNFSF14   |
|  |  |  | TNFSF15   |
|  |  |  | TNFSF18   |
|  |  |  | TNFSF4    |
|  |  |  | TNFSF8    |
|  |  |  | TNFSF9    |

|  |  |  |          |
|--|--|--|----------|
|  |  |  | TNIK     |
|  |  |  | TNNI3    |
|  |  |  | TNNT1    |
|  |  |  | TNNT2    |
|  |  |  | TNNT3    |
|  |  |  | TNPO3    |
|  |  |  | TNRC6B   |
|  |  |  | TOLLIP   |
|  |  |  | TOR1A    |
|  |  |  | TP53     |
|  |  |  | TP53INP1 |
|  |  |  | TP53INP2 |
|  |  |  | TPM1     |
|  |  |  | TPM4     |
|  |  |  | TPO      |
|  |  |  | TPP2     |
|  |  |  | TPT1     |
|  |  |  | TRAF1    |
|  |  |  | TRAF5    |
|  |  |  | TRAF6    |
|  |  |  | TRAM2    |
|  |  |  | TREM1    |
|  |  |  | TRERF1   |
|  |  |  | TRIB3    |
|  |  |  | TRIM14   |
|  |  |  | TRIM21   |
|  |  |  | TRIM31   |
|  |  |  | TRIM38   |
|  |  |  | TRIM39   |
|  |  |  | TRIM5    |
|  |  |  | TRIM63   |
|  |  |  | TRIP12   |
|  |  |  | TRO      |
|  |  |  | TRPA1    |
|  |  |  | TRPC1    |
|  |  |  | TRPC3    |
|  |  |  | TRPC5    |
|  |  |  | TRPC6    |
|  |  |  | TRPM6    |
|  |  |  | TRPM7    |
|  |  |  | TRPM8    |
|  |  |  | TRPS1    |
|  |  |  | TRPV1    |
|  |  |  | TRPV2    |
|  |  |  | TRPV4    |
|  |  |  | TSBP1    |
|  |  |  | TSEN15   |

|  |  |  |         |
|--|--|--|---------|
|  |  |  | TSHZ3   |
|  |  |  | TSLP    |
|  |  |  | TSPAN2  |
|  |  |  | TSPO    |
|  |  |  | TSPYL2  |
|  |  |  | TTC3    |
|  |  |  | TTC39B  |
|  |  |  | TLL5    |
|  |  |  | TLL7    |
|  |  |  | TTN     |
|  |  |  | TTPA    |
|  |  |  | TTR     |
|  |  |  | TUBA4A  |
|  |  |  | TUBA4B  |
|  |  |  | TUBB    |
|  |  |  | TUBB1   |
|  |  |  | TUBB2A  |
|  |  |  | TUBB2B  |
|  |  |  | TUBB3   |
|  |  |  | TUBB4A  |
|  |  |  | TUBB4B  |
|  |  |  | TUBB6   |
|  |  |  | TUBB8   |
|  |  |  | TWIST1  |
|  |  |  | TWSG1   |
|  |  |  | TXN     |
|  |  |  | TXNDC16 |
|  |  |  | TXNIP   |
|  |  |  | TXNL1   |
|  |  |  | TXNL4B  |
|  |  |  | TXNRD2  |
|  |  |  | TYMP    |
|  |  |  | TYR     |
|  |  |  | TYRO3   |
|  |  |  | TYROBP  |
|  |  |  | UBAC1   |
|  |  |  | UBAC2   |
|  |  |  | UBC     |
|  |  |  | UBE2D1  |
|  |  |  | UBE2K   |
|  |  |  | UBE2Z   |
|  |  |  | UBR5    |
|  |  |  | UCN     |
|  |  |  | UCN2    |
|  |  |  | UCN3    |
|  |  |  | UCP1    |
|  |  |  | UCP2    |

|  |  |  |        |
|--|--|--|--------|
|  |  |  | UCP3   |
|  |  |  | UFM1   |
|  |  |  | UGCG   |
|  |  |  | UGT1A1 |
|  |  |  | UMOD   |
|  |  |  | UNC13C |
|  |  |  | UNC5B  |
|  |  |  | UNK    |
|  |  |  | USF1   |
|  |  |  | USF2   |
|  |  |  | USP20  |
|  |  |  | USP48  |
|  |  |  | UTRN   |
|  |  |  | UTS2   |
|  |  |  | UTS2R  |
|  |  |  | VAMP3  |
|  |  |  | VAMP8  |
|  |  |  | VASP   |
|  |  |  | VAV1   |
|  |  |  | VCAM1  |
|  |  |  | VCL    |
|  |  |  | VCP    |
|  |  |  | VDAC1  |
|  |  |  | VDR    |
|  |  |  | VEGFA  |
|  |  |  | VEGFB  |
|  |  |  | VEGFC  |
|  |  |  | VEGFD  |
|  |  |  | VHL    |
|  |  |  | VIM    |
|  |  |  | VIP    |
|  |  |  | VIPR1  |
|  |  |  | VIT    |
|  |  |  | VKORC1 |
|  |  |  | VLDLR  |
|  |  |  | VNN1   |
|  |  |  | VPS51  |
|  |  |  | VSTM2B |
|  |  |  | VWA8   |
|  |  |  | VWF    |
|  |  |  | WDR12  |
|  |  |  | WIPF1  |
|  |  |  | WNT5A  |
|  |  |  | WNT8B  |
|  |  |  | WRN    |
|  |  |  | WWOX   |
|  |  |  | XAB2   |

|  |  |  |          |
|--|--|--|----------|
|  |  |  | XBP1     |
|  |  |  | XCL1     |
|  |  |  | XDH      |
|  |  |  | XPO7     |
|  |  |  | XPR1     |
|  |  |  | XRCC1    |
|  |  |  | XRCC4    |
|  |  |  | XRN2     |
|  |  |  | YAP1     |
|  |  |  | YBX1     |
|  |  |  | YBX3     |
|  |  |  | YME1L1   |
|  |  |  | YWHAQ    |
|  |  |  | YY1      |
|  |  |  | ZAP70    |
|  |  |  | ZBTB7A   |
|  |  |  | ZC3H12A  |
|  |  |  | ZC3HC1   |
|  |  |  | ZDHHC2   |
|  |  |  | ZEB1     |
|  |  |  | ZFHX3    |
|  |  |  | ZFHX4    |
|  |  |  | ZFP36    |
|  |  |  | ZFP64    |
|  |  |  | ZFYVE9   |
|  |  |  | ZG16B    |
|  |  |  | ZGLP1    |
|  |  |  | ZGPAT    |
|  |  |  | ZHX2     |
|  |  |  | ZMPSTE24 |
|  |  |  | ZMYM2    |
|  |  |  | ZNF202   |
|  |  |  | ZNF263   |
|  |  |  | ZNF330   |
|  |  |  | ZNF385D  |
|  |  |  | ZNF433   |
|  |  |  | ZNF462   |
|  |  |  | ZNF536   |
|  |  |  | ZNF609   |
|  |  |  | ZYG11B   |

---

**Supplementary Table 4:**Lists of clustering coefficients of Ec\_hepint, Ec\_not hepint and Ec\_hepint\_random

---

|                  | <b>Atherosclerosis</b> | <b>Myocarditis</b> | <b>Myocardial<br/>infarction</b> | <b>Myocardial<br/>Ischemia</b> |
|------------------|------------------------|--------------------|----------------------------------|--------------------------------|
| Ec_hepint        | 0.496                  | 0.631              | 0.532                            | 0.551                          |
| Ec_not hepint    | 0.330                  | 0.524              | 0.349                            | 0.431                          |
| Ec_hepint_random | 0.348                  | 0.662              | 0.310                            | 0.514                          |

---
